# Supplementary material for: Synthesis and Bioactivity of Thiosemicarbazones Containing Adamantane Skeletons
Source: PubMed Central journal article supplement (PMC7024387; doi:10.3390/molecules25020324), 2020-01-13

## Supporting information

*Article*

# Synthesis and Bioactivity of Thiosemicarbazones containing Adamantane Skeleton

**Van Hien Pham <sup>1</sup>, Thi Phuong Dung Phan <sup>2</sup>, Dinh Chau Phan <sup>3,\*</sup> and Binh Duong Vu <sup>1,\*</sup>**

<sup>1</sup> Drug R&D center, Vietnam Military Medical University. No.160, Phung Hung str., Phuc La ward, Ha Dong district, Hanoi 100000, Vietnam; phamvanhien181288@gmail.com

<sup>2</sup> Department of Pharmaceutical Chemistry, Hanoi University of Pharmacy. No. 15, Le Thanh Tong Str., Hoan Kiem district, Hanoi 100000, Vietnam; pdungdhd@gmail.com

<sup>3</sup> Hanoi University of Science and Technology. No.1, Dai Co Viet str., Bach Khoa ward, Hai Ba Trung district, Hanoi 100000, Vietnam.

\*Correspondence: chau.phandinh@hust.edu.vn (D.C.P); vbduong2978@gmail.com (B.D.V.); Tel.: +84 983 425 460 (B.D.V); Fax: +84 243 688 4077 (B.D.V.).

## Table of content

|                                                                                                                                                                                     |    |
|-------------------------------------------------------------------------------------------------------------------------------------------------------------------------------------|----|
| <b>Scheme 1.</b> Synthesis of thiosemicarbazones <b>2a-k</b> and <b>3a-j</b> .....                                                                                                  | 1  |
| <b>Table 1.</b> Melting point (m.p), yield (%), molecular formulae (Mol.For.), molecular weight (Mol. Wt.) and Rf of thiosemicarbazones <b>2a-k</b> and <b>3a-j</b> .....           | 2  |
| <b>Table 2.</b> Minimum inhibitory concentration (MIC) of synthesized thiosemicarbazones <b>2a-k</b> and <b>3a-j</b> ..                                                             | 3  |
| <b>Table 3.</b> IC <sub>50</sub> of synthesized thiosemicarbazones <b>2a-k</b> and <b>3a-j</b> .....                                                                                | 4  |
| <b>Table 4.</b> The effect of newly synthesized thiosemicarbazones <b>2a-k</b> and <b>3a-j</b> on the viability of HeP3B, Hela, A549, and MCF-7 cells after 48 h of incubation..... | 5  |
| <sup>1</sup> H-NMR spectrum of compound <b>2a</b> .....                                                                                                                             | 6  |
| <sup>13</sup> C-NMR spectrum of compound <b>2a</b> .....                                                                                                                            | 6  |
| HMBC spectrum of compound <b>2a</b> .....                                                                                                                                           | 7  |
| HSQC spectrum of compound <b>2a</b> .....                                                                                                                                           | 7  |
| DEPT spectrum of compound <b>2a</b> .....                                                                                                                                           | 8  |
| HR-ESI-MS spectrum of compound <b>2a</b> .....                                                                                                                                      | 8  |
| <sup>1</sup> H-NMR spectrum of compound <b>2b</b> .....                                                                                                                             | 9  |
| <sup>13</sup> C-NMR spectrum of compound <b>2b</b> .....                                                                                                                            | 9  |
| ESI-MS spectrum of compound <b>2b</b> (negative).....                                                                                                                               | 10 |
| ESI-MS spectrum of compound <b>2b</b> (positive).....                                                                                                                               | 10 |
| <sup>1</sup> H-NMR spectrum of compound <b>2c</b> .....                                                                                                                             | 11 |
| <sup>13</sup> C-NMR spectrum of compound <b>2c</b> .....                                                                                                                            | 11 |
| ESI-MS spectrum of compound <b>2c</b> (negative).....                                                                                                                               | 12 |
| ESI-MS spectrum of compound <b>2c</b> (positive).....                                                                                                                               | 12 |
| <sup>1</sup> H-NMR spectrum of compound <b>2d</b> .....                                                                                                                             | 13 |
| <sup>13</sup> C-NMR spectrum of compound <b>2d</b> .....                                                                                                                            | 13 |
| ESI-MS spectrum of compound <b>2d</b> (negative).....                                                                                                                               | 14 |
| ESI-MS spectrum of compound <b>2d</b> (positive).....                                                                                                                               | 14 |
| <sup>1</sup> H-NMR spectrum of compound <b>2e</b> .....                                                                                                                             | 15 |
| <sup>13</sup> C-NMR spectrum of compound <b>2e</b> .....                                                                                                                            | 15 |
| ESI-MS spectrum of compound <b>2e</b> (negative) .....                                                                                                                              | 16 |
| ESI-MS spectrum of compound <b>2e</b> (positive) .....                                                                                                                              | 16 |
| <sup>1</sup> H-NMR spectrum of compound <b>2f</b> .....                                                                                                                             | 17 |
| <sup>13</sup> C-NMR spectrum of compound <b>2f</b> .....                                                                                                                            | 17 |
| ESI-MS spectrum of compound <b>2f</b> (negative).....                                                                                                                               | 18 |
| ESI-MS spectrum of compound <b>2f</b> (positive).....                                                                                                                               | 18 |
| <sup>1</sup> H-NMR spectrum of compound <b>2g</b> .....                                                                                                                             | 19 |
| <sup>13</sup> C-NMR spectrum of compound <b>2g</b> .....                                                                                                                            | 19 |
| ESI-MS spectrum of compound <b>2g</b> (negative) .....                                                                                                                              | 20 |
| ESI-MS spectrum of compound <b>2g</b> (positive) .....                                                                                                                              | 20 |
| <sup>1</sup> H-NMR spectrum of compound <b>2h</b> .....                                                                                                                             | 21 |
| <sup>13</sup> C-NMR spectrum of compound <b>2h</b> .....                                                                                                                            | 21 |
| ESI-MS spectrum of compound <b>2h</b> (negative).....                                                                                                                               | 22 |
| ESI-MS spectrum of compound <b>2h</b> (positive).....                                                                                                                               | 22 |
| <sup>1</sup> H-NMR spectrum of compound <b>2i</b> .....                                                                                                                             | 23 |
| <sup>13</sup> C-NMR spectrum of compound <b>2i</b> .....                                                                                                                            | 23 |
| ESI-MS spectrum of compound <b>2i</b> (negative) .....                                                                                                                              | 24 |
| ESI-MS spectrum of compound <b>2i</b> (positive).....                                                                                                                               | 24 |
| <sup>1</sup> H-NMR spectrum of compound <b>2j</b> .....                                                                                                                             | 25 |
| <sup>13</sup> C-NMR spectrum of compound <b>2j</b> .....                                                                                                                            | 25 |
| ESI-MS spectrum of compound <b>2j</b> (negative).....                                                                                                                               | 26 |

|                                                          |    |
|----------------------------------------------------------|----|
| ESI-MS spectrum of compound <b>2j</b> (positive).....    | 26 |
| <sup>1</sup> H-NMR spectrum of compound <b>2k</b> .....  | 27 |
| <sup>13</sup> C-NMR spectrum of compound <b>2k</b> ..... | 27 |
| ESI-MS spectrum of compound <b>2k</b> (negative).....    | 28 |
| ESI-MS spectrum of compound <b>2k</b> (positive).....    | 28 |
| <sup>1</sup> H-NMR spectrum of compound <b>3a</b> .....  | 29 |
| <sup>13</sup> C-NMR spectrum of compound <b>3a</b> ..... | 29 |
| ESI-MS spectrum of compound <b>3a</b> (negative).....    | 30 |
| ESI-MS spectrum of compound <b>3a</b> (positive).....    | 30 |
| <sup>1</sup> H-NMR spectrum of compound <b>3b</b> .....  | 31 |
| <sup>13</sup> C-NMR spectrum of compound <b>3b</b> ..... | 31 |
| ESI-MS spectrum of compound <b>3b</b> (negative).....    | 32 |
| ESI-MS spectrum of compound <b>3b</b> (positive).....    | 32 |
| <sup>1</sup> H-NMR spectrum of compound <b>3c</b> .....  | 33 |
| <sup>13</sup> C-NMR spectrum of compound <b>3c</b> ..... | 33 |
| ESI-MS spectrum of compound <b>3c</b> (negative).....    | 34 |
| ESI-MS spectrum of compound <b>3c</b> (positive).....    | 34 |
| <sup>1</sup> H-NMR spectrum of compound <b>3d</b> .....  | 35 |
| <sup>13</sup> C-NMR spectrum of compound <b>3d</b> ..... | 35 |
| ESI-MS spectrum of compound <b>3d</b> (negative).....    | 36 |
| ESI-MS spectrum of compound <b>3d</b> (positive).....    | 36 |
| <sup>1</sup> H-NMR spectrum of compound <b>3e</b> .....  | 37 |
| <sup>13</sup> C-NMR spectrum of compound <b>3e</b> ..... | 37 |
| ESI-MS spectrum of compound <b>3e</b> (negative).....    | 38 |
| ESI-MS spectrum of compound <b>3e</b> (positive).....    | 38 |
| <sup>1</sup> H-NMR spectrum of compound <b>3f</b> .....  | 39 |
| <sup>13</sup> C-NMR spectrum of compound <b>3f</b> ..... | 39 |
| ESI-MS spectrum of compound <b>3f</b> (negative).....    | 40 |
| ESI-MS spectrum of compound <b>3f</b> (positive).....    | 40 |
| <sup>1</sup> H-NMR spectrum of compound <b>3g</b> .....  | 41 |
| <sup>13</sup> C-NMR spectrum of compound <b>3g</b> ..... | 41 |
| ESI-MS spectrum of compound <b>3g</b> (negative).....    | 42 |
| ESI-MS spectrum of compound <b>3g</b> (positive).....    | 42 |
| <sup>1</sup> H-NMR spectrum of compound <b>3h</b> .....  | 43 |
| <sup>13</sup> C-NMR spectrum of compound <b>3h</b> ..... | 43 |
| ESI-MS spectrum of compound <b>3h</b> (positive).....    | 44 |
| <sup>1</sup> H-NMR spectrum of compound <b>3i</b> .....  | 45 |
| <sup>13</sup> C-NMR spectrum of compound <b>3i</b> ..... | 45 |
| ESI-MS spectrum of compound <b>3i</b> (negative).....    | 46 |
| ESI-MS spectrum of compound <b>3i</b> (positive).....    | 46 |
| <sup>1</sup> H-NMR spectrum of compound <b>3j</b> .....  | 47 |
| <sup>13</sup> C-NMR spectrum of compound <b>3j</b> ..... | 47 |
| ESI-MS spectrum of compound <b>3j</b> (negative).....    | 48 |
| ESI-MS spectrum of compound <b>3j</b> (positive).....    | 48 |

**Scheme 1.** Synthesis of thiosemicarbazones **2a-k** and **3a-j**.

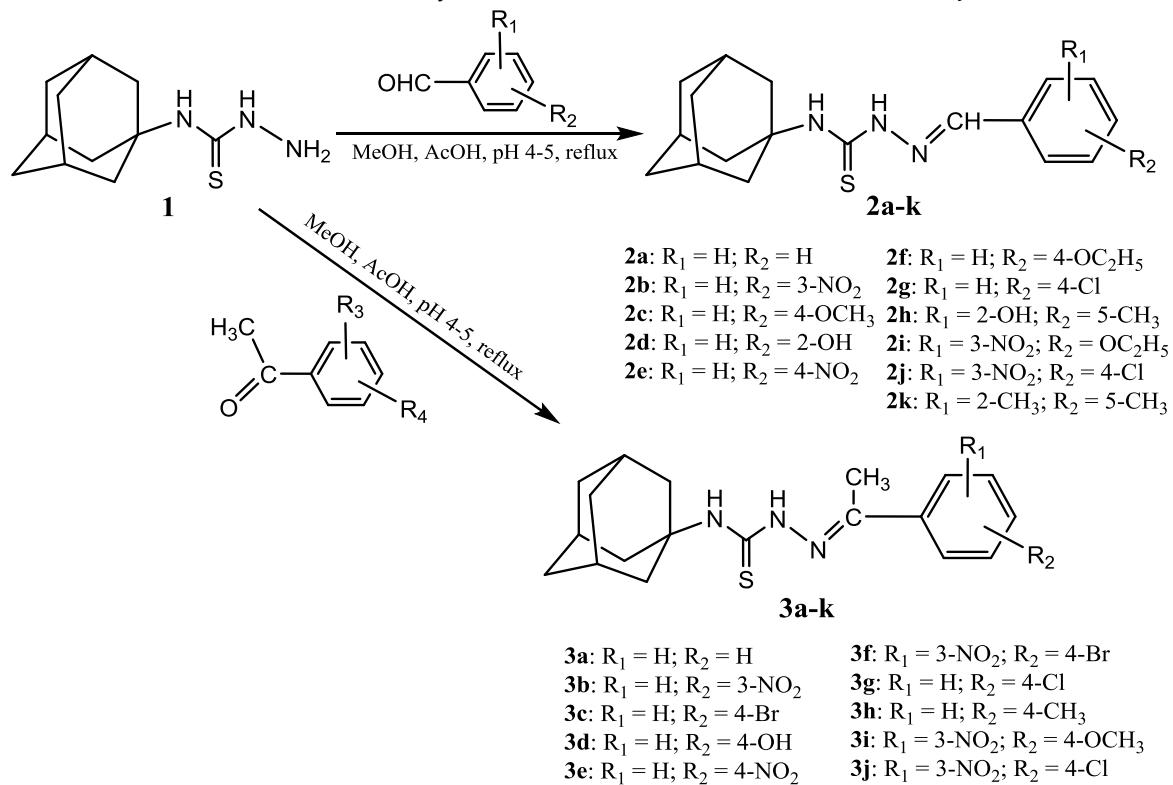

**Table 1.** Melting point (m.p), yield (%), molecular formulae (Mol.For.), molecular weight (Mol. Wt.) and Rf of thiosemicarbazones **2a–k** and **3a–j**.

| Comp.     | R1                | R2                               | Yield (%) | m.p (°C)    | Mol.For. (Mol. Wt.)                                                        | Rf   |
|-----------|-------------------|----------------------------------|-----------|-------------|----------------------------------------------------------------------------|------|
| <b>2a</b> | H                 | H                                | 97.0      | 210.1-212.2 | C <sub>18</sub> H <sub>23</sub> N <sub>3</sub> S (313.46)                  | 0.46 |
| <b>2b</b> | H                 | 3-NO <sub>2</sub>                | 92.7      | 244.2-246.1 | C <sub>18</sub> H <sub>22</sub> N <sub>4</sub> O <sub>2</sub> S (358.46)   | 0.38 |
| <b>2c</b> | H                 | 4-OCH <sub>3</sub>               | 95.7      | 224.5-227.7 | C <sub>19</sub> H <sub>25</sub> N <sub>3</sub> OS (343.49)                 | 0.50 |
| <b>2d</b> | H                 | 2-OH                             | 95.7      | 203.8-205.6 | C <sub>18</sub> H <sub>23</sub> N <sub>3</sub> OS (329.46)                 | 0.46 |
| <b>2e</b> | H                 | 4-NO <sub>2</sub>                | 91.3      | 258.1-260.1 | C <sub>18</sub> H <sub>22</sub> N <sub>4</sub> O <sub>2</sub> S (358.46)   | 0.43 |
| <b>2f</b> | H                 | 4-OC <sub>2</sub> H <sub>5</sub> | 95.6      | 232.2-233.6 | C <sub>20</sub> H <sub>27</sub> N <sub>3</sub> OS (357.52)                 | 0.54 |
| <b>2g</b> | H                 | 4-Cl                             | 89.6      | 238.9-239.7 | C <sub>18</sub> H <sub>22</sub> ClN <sub>3</sub> S (347.91)                | 0.68 |
| <b>2h</b> | 2-OH              | 5-CH <sub>3</sub>                | 91.0      | 241.6-242.5 | C <sub>19</sub> H <sub>25</sub> N <sub>3</sub> OS (343.49)                 | 0.54 |
| <b>2i</b> | 3-NO <sub>2</sub> | 4-OC <sub>2</sub> H <sub>5</sub> | 61.2      | 218.7-220.7 | C <sub>20</sub> H <sub>26</sub> N <sub>4</sub> O <sub>3</sub> S (402.51)   | 0.64 |
| <b>2j</b> | 3-NO <sub>2</sub> | 4-Cl                             | 78.5      | 252.8-254.0 | C <sub>18</sub> H <sub>21</sub> ClN <sub>4</sub> O <sub>2</sub> S (392.90) | 0.53 |
| <b>2k</b> | 2-CH <sub>3</sub> | 5-CH <sub>3</sub>                | 92.5      | 212.4-213.8 | C <sub>20</sub> H <sub>27</sub> N <sub>3</sub> S (341.52)                  | 0.68 |
| <b>3a</b> | H                 | H                                | 91.8      | 231.2-232.7 | C <sub>19</sub> H <sub>25</sub> N <sub>3</sub> S (327.49)                  | 0.46 |
| <b>3b</b> | H                 | 3-NO <sub>2</sub>                | 67.0      | 251.7-253.5 | C <sub>19</sub> H <sub>24</sub> N <sub>3</sub> O <sub>2</sub> S (372.49)   | 0.47 |
| <b>3c</b> | H                 | 4-Br                             | 65.5      | 240.9-242.9 | C <sub>19</sub> H <sub>24</sub> BrN <sub>3</sub> S (406.39)                | 0.46 |
| <b>3d</b> | H                 | 4-OH                             | 44.3      | 272.8-273.5 | C <sub>19</sub> H <sub>25</sub> N <sub>3</sub> OS (343.49)                 | 0.53 |
| <b>3e</b> | H                 | 4-NO <sub>2</sub>                | 90.4      | 266.5-268.9 | C <sub>19</sub> H <sub>24</sub> N <sub>4</sub> O <sub>2</sub> S (372.49)   | 0.50 |
| <b>3f</b> | 3-NO <sub>2</sub> | 4-Br                             | 17.5      | 224.5-225.3 | C <sub>19</sub> H <sub>23</sub> BrN <sub>4</sub> O <sub>2</sub> S (451.38) | 0.53 |
| <b>3g</b> | H                 | 4-Cl                             | 94.0      | 235.0-236.3 | C <sub>19</sub> H <sub>24</sub> ClN <sub>3</sub> S (361.93)                | 0.58 |
| <b>3h</b> | H                 | 4-CH <sub>3</sub>                | 73.5      | 230.3-232.2 | C <sub>20</sub> H <sub>27</sub> N <sub>3</sub> S (341.52)                  | 0.36 |
| <b>3i</b> | 3-NO <sub>2</sub> | 4-OCH <sub>3</sub>               | 69.3      | 224.6-226.3 | C <sub>20</sub> H <sub>26</sub> N <sub>4</sub> O <sub>3</sub> S (402.51)   | 0.45 |
| <b>3j</b> | 3-NO <sub>2</sub> | 4-Cl                             | 49.8      | 250.9-252.4 | C <sub>19</sub> H <sub>23</sub> ClN <sub>4</sub> O <sub>2</sub> S (406.93) | 0.54 |

\*Solvent: chloroform/acetone (95/5, *v/v*), visualization at UV 254 nm.

**Table 2.** Minimum inhibitory concentration (MIC) of synthesized thiosemicarbazones **2a-k** and **3a-j**.

| Comp. No. | MIC of Synthesized Compounds ( $\mu\text{M}$ ) |     |     |          |     |     | Fungus |
|-----------|------------------------------------------------|-----|-----|----------|-----|-----|--------|
|           | Gram (+)                                       |     |     | Gram (-) |     |     |        |
|           | EF                                             | SA  | BC  | EC       | PA  | SE  |        |
| <b>2a</b> | 100                                            | 25  | 25  | -        | -   | -   | 25     |
| <b>2b</b> | 25                                             | 50  | 25  | -        | -   | -   | 6.25   |
| <b>2c</b> | 12,5                                           | 50  | 100 | -        | -   | -   | 6.25   |
| <b>2d</b> | 25                                             | -   | 100 | -        | 100 | -   | 25     |
| <b>2e</b> | 100                                            | 50  | 50  | -        | -   | -   | 12.5   |
| <b>2f</b> | 50                                             | 50  | 50  | -        | -   | -   | 25     |
| <b>2g</b> | 25                                             | 25  | 25  | -        | -   | -   | 6.25   |
| <b>2h</b> | 50                                             | 25  | 50  | -        | 100 | -   | 12.5   |
| <b>2i</b> | 50                                             | 50  | 25  | -        | -   | -   | 12.5   |
| <b>2j</b> | 50                                             | 50  | 50  | -        | -   | -   | 25     |
| <b>2k</b> | 100                                            | 25  | 50  | -        | -   | -   | 12.5   |
| <b>3a</b> | 25                                             | 25  | 50  | -        | -   | -   | 12.5   |
| <b>3b</b> | 100                                            | 25  | 25  | -        | -   | -   | 25     |
| <b>3c</b> | 100                                            | 100 | 100 | -        | -   | -   | 25     |
| <b>3d</b> | 50                                             | 50  | 50  | -        | -   | -   | 25     |
| <b>3e</b> | 25                                             | 25  | 25  | -        | -   | -   | 6.25   |
| <b>3f</b> | 25                                             | 50  | 50  | -        | -   | -   | 25     |
| <b>3g</b> | 25                                             | 100 | 100 | -        | -   | -   | 25     |
| <b>3h</b> | 50                                             | 25  | 50  | -        | -   | -   | 12.5   |
| <b>3i</b> | 50                                             | 50  | 50  | -        | -   | -   | 25     |
| <b>3j</b> | 100                                            | 25  | 50  | -        | -   | -   | 12.5   |
| STM       | 350                                            | 350 | 175 | 44       | 350 | 175 | NT     |
| CHM       | NT                                             | NT  | NT  | NT       | NT  | NT  | 114    |

EF: *Enterococcus faecalis* (ATCC13124); SA: *Staphylococcus aureus* (ATCC25923); BC: *Bacillus cereus* (ATCC 13245); EC: *Escherichia coli* (ATCC25922); PA: *Pseudomonas aeruginosa* (ATCC27853); SE: *Salmonella enterica* (ATCC12228); CA: *Candida albicans* (ATCC10231); STM: streptomycine; CHM: Cycloheximide; NT: not tested; - : inactive.

**Table 3.** IC<sub>50</sub> of synthesized thiosemicarbazones **2a-k** and **3a-j**.

| Comp. No. | IC <sub>50</sub> of Synthesized Compounds (μM) |       |       |          |       |    |        |
|-----------|------------------------------------------------|-------|-------|----------|-------|----|--------|
|           | Gram (+)                                       |       |       | Gram (-) |       |    | Fungus |
|           | EF                                             | SA    | BC    | EC       | PA    | SE | CA     |
| 2a        | 24.78                                          | 4.78  | 4.12  | -        | -     | -  | 6.78   |
| 2b        | 10.78                                          | 8.99  | 12.45 | -        | -     | -  | 3.57   |
| 2c        | 5.68                                           | 9.66  | 8.24  | -        | -     | -  | 3.45   |
| 2d        | 4.89                                           | -     | 25.22 | -        | 24.67 | -  | 5.35   |
| 2e        | 25.89                                          | 6.78  | 6.09  | -        | -     | -  | 5.56   |
| 2f        | 12.78                                          | 7.88  | 7.82  | -        | -     | -  | 6.35   |
| 2g        | 6.78                                           | 7.89  | 6.88  | -        | -     | -  | 3.24   |
| 2h        | 11.67                                          | 6.24  | 7.56  | -        | 27.45 | -  | 4.57   |
| 2i        | 12.78                                          | 12.56 | 12.11 | -        | -     | -  | 3.57   |
| 2j        | 6.88                                           | 22.67 | 22.12 | -        | -     | -  | 4.34   |
| 2k        | 47.89                                          | 6.45  | 8.49  | -        | -     | -  | 5.68   |
| 3a        | 6.34                                           | 6.99  | 12.33 | -        | -     | -  | 3.67   |
| 3b        | 25.89                                          | 8.99  | 9.91  | -        | -     | -  | 7.89   |
| 3c        | 28.99                                          | 50.22 | 40.45 | -        | -     | -  | 5.67   |
| 3d        | 17.89                                          | 21.45 | 25.89 | -        | -     | -  | 6.78   |
| 3e        | 4.67                                           | 9.23  | 10.11 | -        | -     | -  | 3.22   |
| 3f        | 13.57                                          | 21.44 | 11.88 | -        | -     | -  | 3.67   |
| 3g        | 4.78                                           | 35.67 | 32.11 | -        | -     | -  | 5.34   |
| 3h        | 12.56                                          | 7.88  | 9.85  | -        | -     | -  | 6.79   |
| 3i        | 12.57                                          | 15.67 | 25.62 | -        | -     | -  | 7.89   |
| 3j        | 35.46                                          | 6.46  | 7.49  | -        | -     | -  | 4.67   |

EF: *Enterococcus faecalis* ATCC13124; SA: *Staphylococcus aureus* ATCC25923; BC: *Bacillus cereus* ATCC 13245; EC: *Escherichia coli* ATCC25922; PA: *Pseudomonas aeruginosa* ATCC27853; SE: *Salmonella enterica* ATCC12228; CA: *Candida albicans* ATCC10231; - : inactive

**Table 4.** The effect of newly synthesized thiosemicarbazones **2a-k** and **3a-j** on the viability of HeP3B, Hela, A549, and MCF-7 cells after 48 h of incubation.

| Comp. No.   | Conc.   | Hep3B        | Hela         | A549         | MCF-7        |
|-------------|---------|--------------|--------------|--------------|--------------|
| <b>2a</b>   | 30µM    | 69.07 ± 1.37 | 71.58 ± 1.49 | 75.40 ± 1.50 | 58.80 ± 1.23 |
|             | 100 µM  | 64.47 ± 0.86 | 60.07 ± 0.97 | 70.38 ± 0.94 | 49.35 ± 0.79 |
| <b>2b</b>   | 30µM    | 76.33 ± 1.79 | 55.29 ± 1.10 | 83.32 ± 1.96 | 45.42 ± 0.91 |
|             | 100 µM  | 70.72 ± 0.46 | 53.80 ± 1.41 | 77.20 ± 0.50 | 43.31 ± 2.63 |
| <b>2c</b>   | 30µM    | 68.60 ± 2.74 | 72.09 ± 2.30 | 76.36 ± 1.82 | 59.22 ± 1.89 |
|             | 100 µM  | 59.84 ± 2.20 | 59.67 ± 1.43 | 65.32 ± 2.40 | 49.02 ± 1.18 |
| <b>2d</b>   | 30µM    | 19.34 ± 2.54 | 61.12 ± 1.91 | 21.11 ± 2.78 | 50.21 ± 1.57 |
|             | 100 µM  | 16.82 ± 1.60 | 24.55 ± 1.85 | 18.37 ± 1.75 | 20.17 ± 1.52 |
| <b>2e</b>   | 30µM    | 67.73 ± 1.34 | 72.77 ± 2.42 | 73.94 ± 1.46 | 59.79 ± 1.99 |
|             | 100 µM  | 68.2 ± 0.63  | 61.01 ± 1.16 | 74.45 ± 0.69 | 50.12 ± 0.95 |
| <b>2f</b>   | 30µM    | 63.5 ± 1.47  | 69.84 ± 1.85 | 69.32 ± 1.61 | 57.38 ± 1.52 |
|             | 100 µM  | 54.53 ± 1.19 | 57.2 ± 2.90  | 59.53 ± 1.30 | 47.00 ± 2.38 |
| <b>2g</b>   | 30µM    | 76.83 ± 2.31 | 71.65 ± 2.01 | 83.87 ± 2.52 | 42.50 ± 2.35 |
|             | 100 µM  | 70.25 ± 0.41 | 47.90 ± 2.03 | 76.69 ± 0.44 | 39.35 ± 1.67 |
| <b>2h</b>   | 30µM    | 23.71 ± 0.88 | 44.42 ± 2.35 | 25.88 ± 0.96 | 36.50 ± 1.93 |
|             | 100 µM  | 21.86 ± 0.20 | 34.76 ± 1.36 | 23.86 ± 0.22 | 28.55 ± 1.12 |
| <b>2i</b>   | 30µM    | 78.88 ± 2.63 | 64.37 ± 1.47 | 86.11 ± 2.88 | 52.89 ± 1.21 |
|             | 100 µM  | 76.06 ± 0.27 | 61.40 ± 0.17 | 83.03 ± 0.29 | 50.45 ± 0.14 |
| <b>2j</b>   | 30µM    | 65.01 ± 2.17 | 46.16 ± 0.38 | 70.97 ± 2.37 | 37.92 ± 0.31 |
|             | 100 µM  | 62.83 ± 2.23 | 40.66 ± 1.04 | 68.59 ± 2.43 | 33.40 ± 0.86 |
| <b>2k</b>   | 30µM    | 67.46 ± 1.69 | 69.88 ± 2.12 | 73.64 ± 1.84 | 57.41 ± 1.74 |
|             | 100 µM  | 46.78 ± 0.21 | 55.18 ± 2.92 | 51.06 ± 0.23 | 45.33 ± 2.40 |
| <b>3a</b>   | 30µM    | 72.06 ± 1.92 | 74.40 ± 1.07 | 78.67 ± 2.09 | 61.12 ± 0.88 |
|             | 100 µM  | 67.93 ± 1.11 | 69.77 ± 0.35 | 74.16 ± 1.22 | 57.32 ± 0.29 |
| <b>3b</b>   | 30µM    | 75.15 ± 0.36 | 70.17 ± 1.90 | 82.04 ± 0.40 | 57.64 ± 1.56 |
|             | 100 µM  | 71.76 ± 0.48 | 68.65 ± 2.51 | 78.34 ± 0.52 | 56.40 ± 2.06 |
| <b>3c</b>   | 30µM    | 85.76 ± 2.42 | 81.90 ± 2.11 | 93.62 ± 2.64 | 67.28 ± 1.74 |
|             | 100 µM  | 68.37 ± 1.58 | 64.27 ± 2.47 | 74.63 ± 1.73 | 52.80 ± 2.03 |
| <b>3d</b>   | 30µM    | 80.15 ± 1.68 | 81.46 ± 1.60 | 87.5 ± 1.83  | 66.92 ± 1.31 |
|             | 100 µM  | 72.57 ± 1.83 | 73.28 ± 2.50 | 79.22 ± 2.00 | 60.20 ± 2.05 |
| <b>3e</b>   | 30µM    | 67.02 ± 1.37 | 80.59 ± 1.39 | 73.17 ± 1.49 | 66.21 ± 1.14 |
|             | 100 µM  | 53.79 ± 0.71 | 77.66 ± 0.29 | 58.72 ± 0.77 | 63.80 ± 0.24 |
| <b>3f</b>   | 30µM    | 72.26 ± 1.01 | 77.05 ± 2.19 | 78.89 ± 1.11 | 63.30 ± 1.80 |
|             | 100 µM  | 65.95 ± 0.25 | 67.78 ± 1.64 | 71.99 ± 0.28 | 55.68 ± 1.35 |
| <b>3g</b>   | 30µM    | 80.42 ± 1.16 | 62.38 ± 0.71 | 87.79 ± 1.27 | 51.25 ± 0.58 |
|             | 100 µM  | 70.65 ± 1.77 | 51.23 ± 0.49 | 77.13 ± 1.94 | 42.09 ± 0.40 |
| <b>3h</b>   | 30µM    | 75.08 ± 1.11 | 81.90 ± 1.04 | 81.96 ± 1.21 | 67.28 ± 0.85 |
|             | 100 µM  | 67.16 ± 2.57 | 75.92 ± 1.60 | 73.31 ± 2.81 | 62.37 ± 1.31 |
| <b>3i</b>   | 30µM    | 78.34 ± 0.71 | 77.12 ± 2.03 | 85.52 ± 0.77 | 63.36 ± 1.67 |
|             | 100 µM  | 74.04 ± 0.61 | 56.81 ± 1.81 | 80.83 ± 0.67 | 46.67 ± 1.49 |
| <b>3j</b>   | 30µM    | 69.54 ± 2.39 | 87.18 ± 1.91 | 75.92 ± 2.61 | 71.62 ± 1.57 |
|             | 100 µM  | 61.25 ± 2.24 | 74.51 ± 2.17 | 66.86 ± 2.45 | 61.21 ± 1.78 |
| <b>CPT*</b> | 0.3 µM  | 69.56 ± 1.27 | 57.06 ± 1.35 | 67.68 ± 1.88 | 56.68 ± 0.68 |
|             | 14.4 µM | 37.65 ± 1.21 | 18.61 ± 0.56 | 26.74 ± 2.16 | 28.89 ± 1.07 |

\*Camptothecine. Data is presented as percentage of the cell viability ± SD.



<sup>1</sup>H-NMR spectrum of compound **2a**

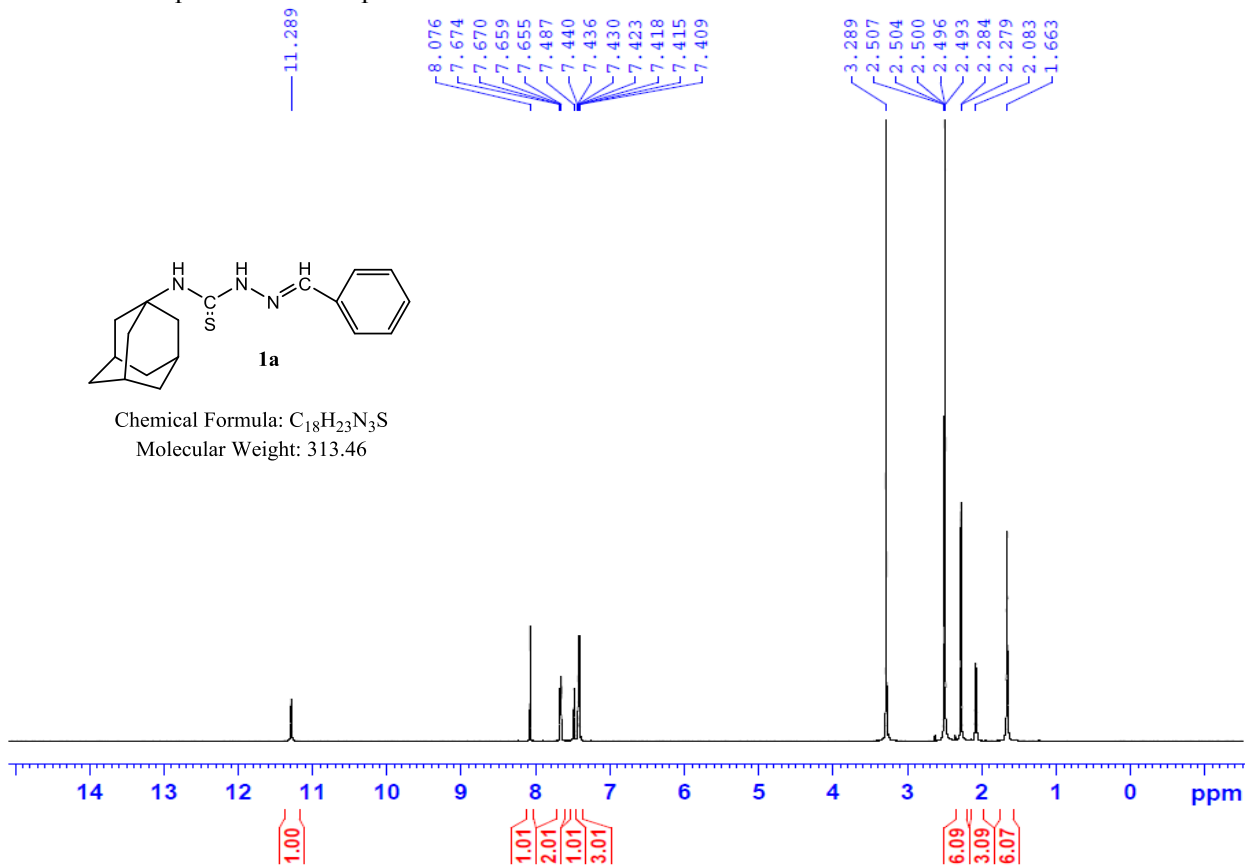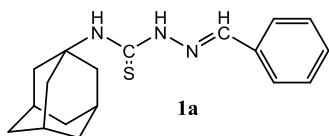

Chemical Formula: C<sub>18</sub>H<sub>23</sub>N<sub>3</sub>S  
Molecular Weight: 313.46

<sup>13</sup>C-NMR spectrum of compound **2a**

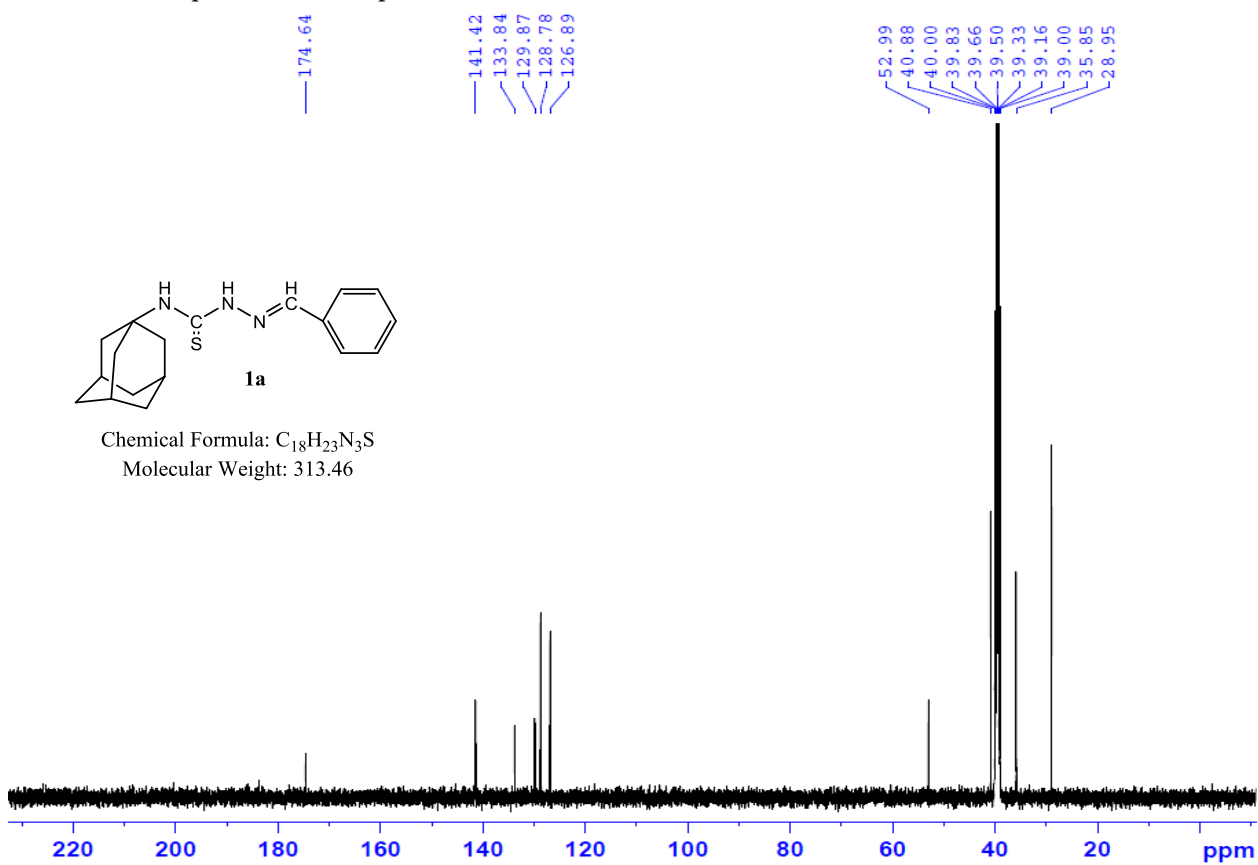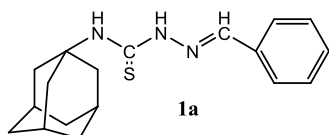

Chemical Formula: C<sub>18</sub>H<sub>23</sub>N<sub>3</sub>S  
Molecular Weight: 313.46

HMBC spectrum of compound 2a

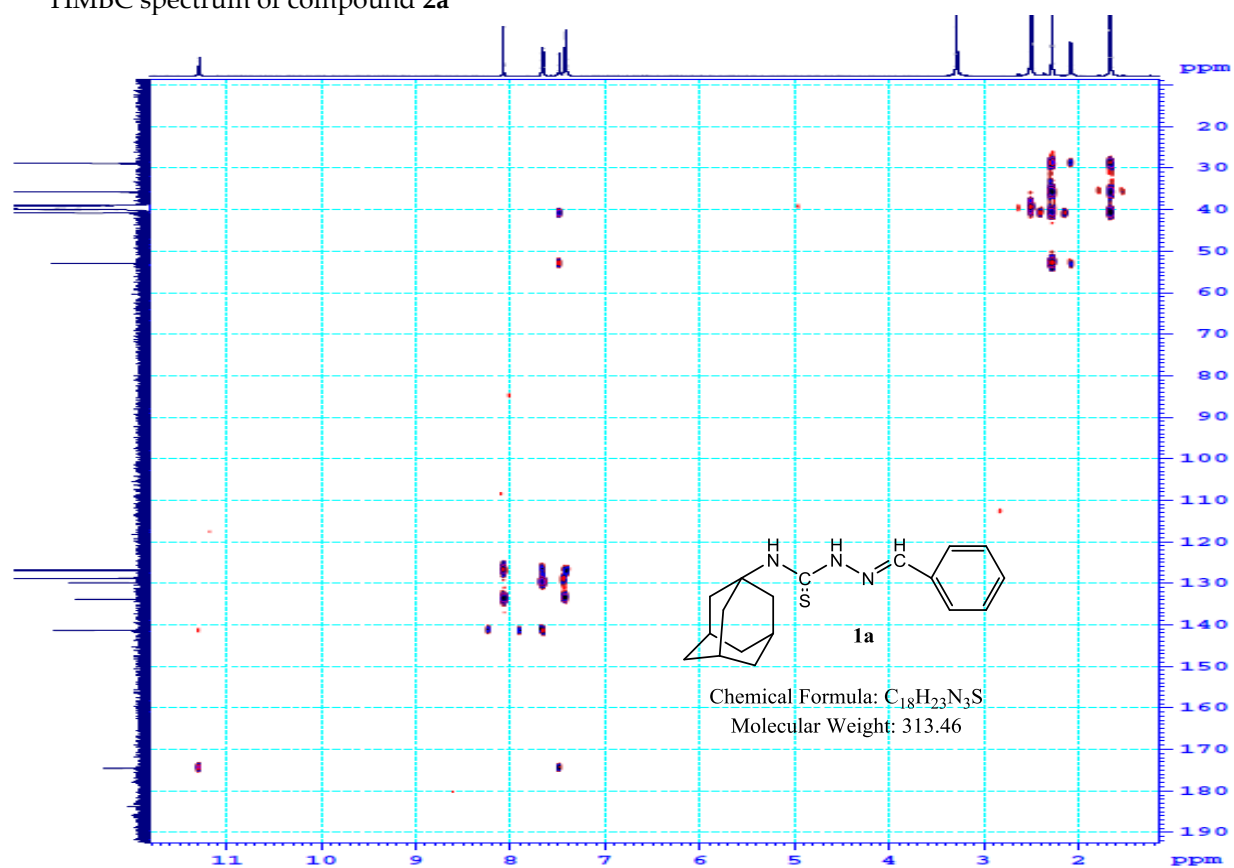

HSQC spectrum of compound 2a

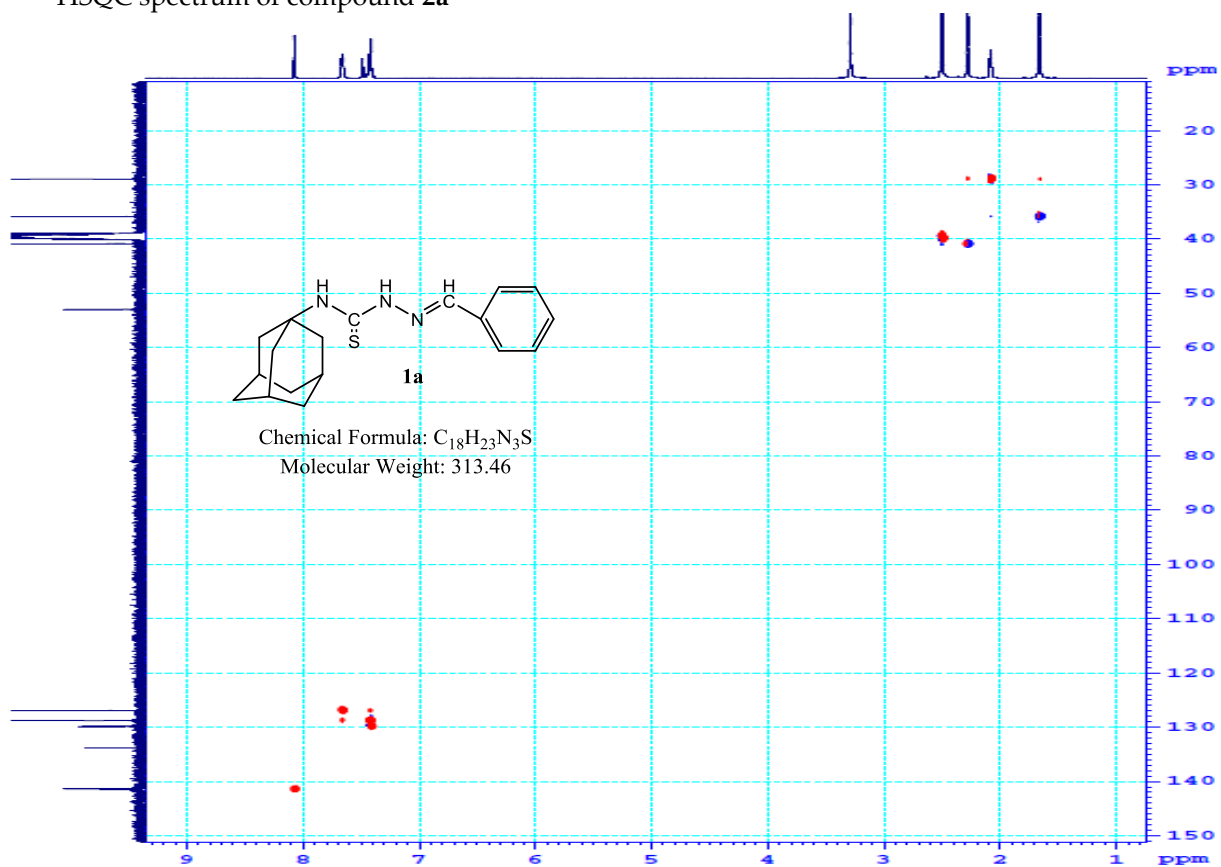

### DEPT spectrum of compound 2a

DEPT90

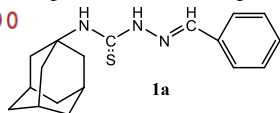

Chemical Formula:  $C_{18}H_{23}N_3S$   
Molecular Weight: 313.46

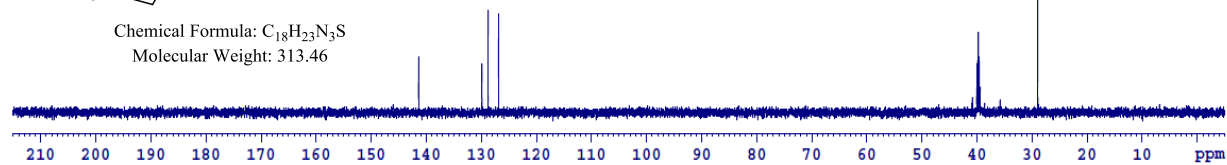

DEPT135

CH&CH3

CH2

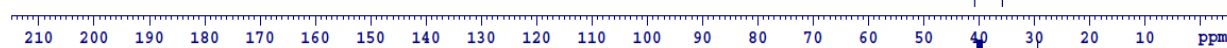

C13CPD

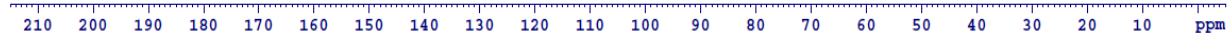

### HR-ESI-MS spectrum of compound 2a

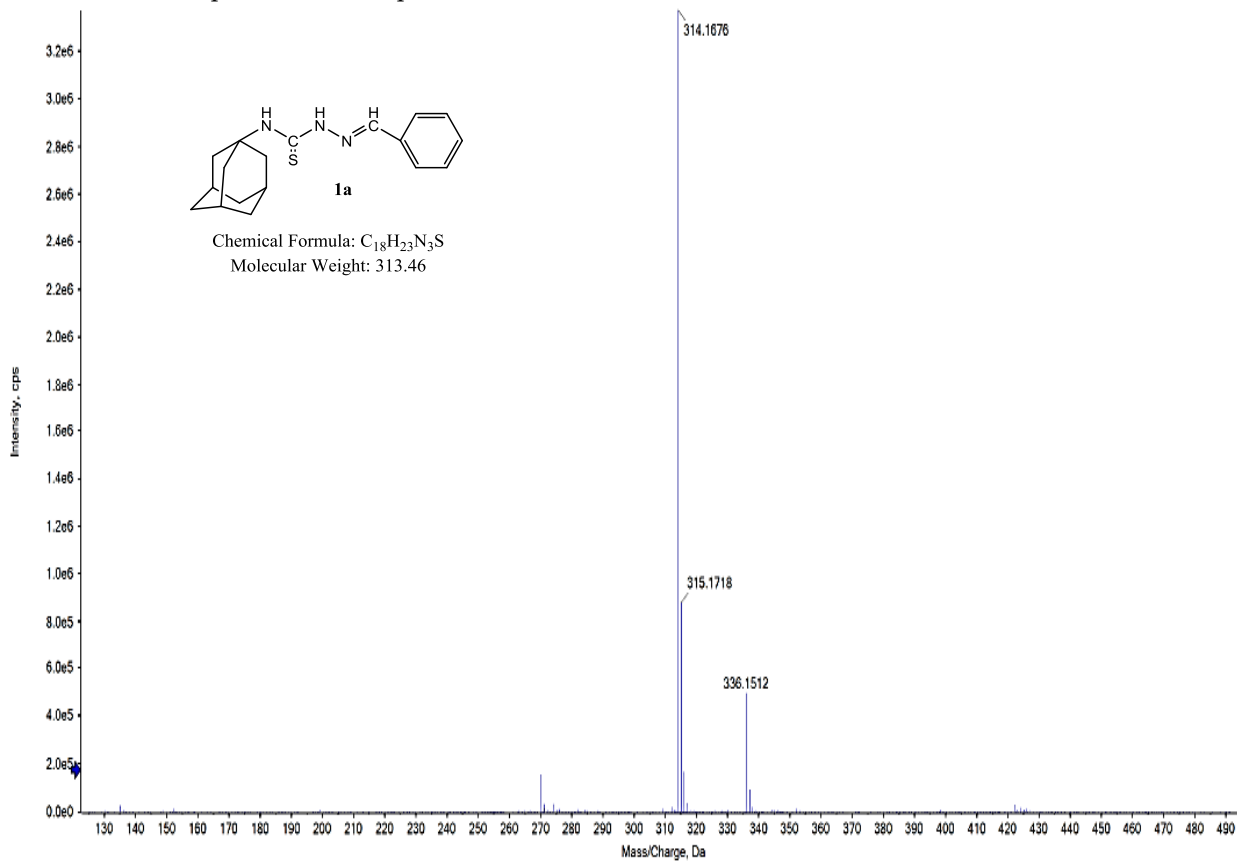

<sup>1</sup>H-NMR spectrum of compound **2b**

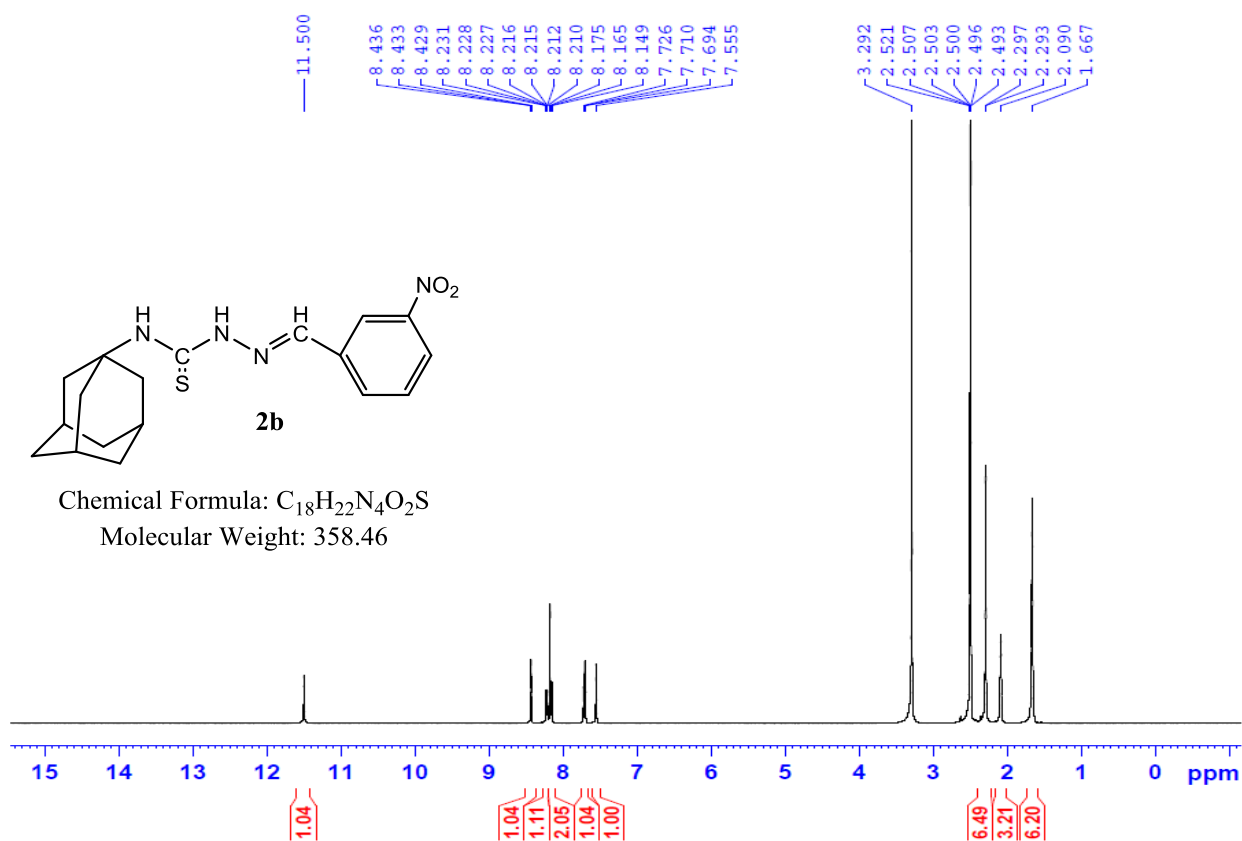

<sup>13</sup>C-NMR spectrum of compound **2b**

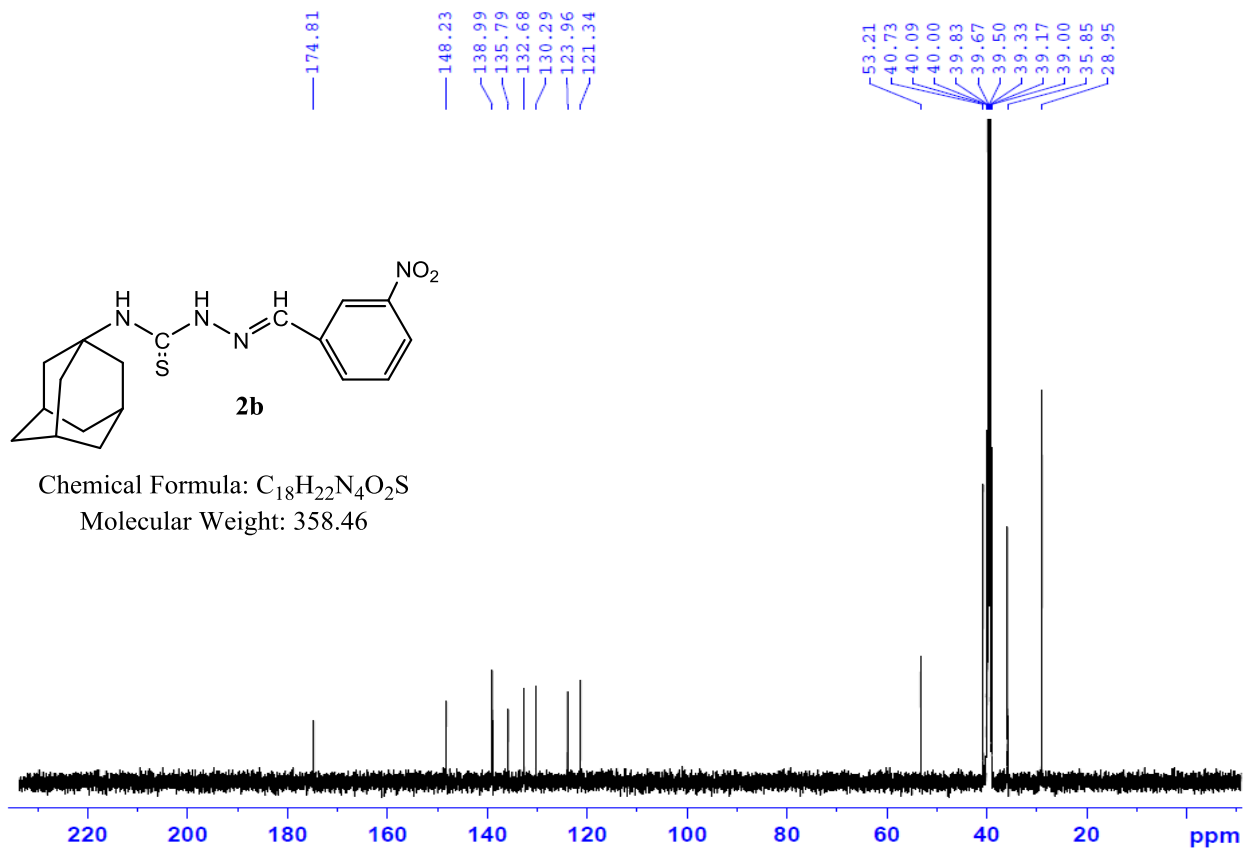

ESI-MS spectrum of compound **2b** (negative)

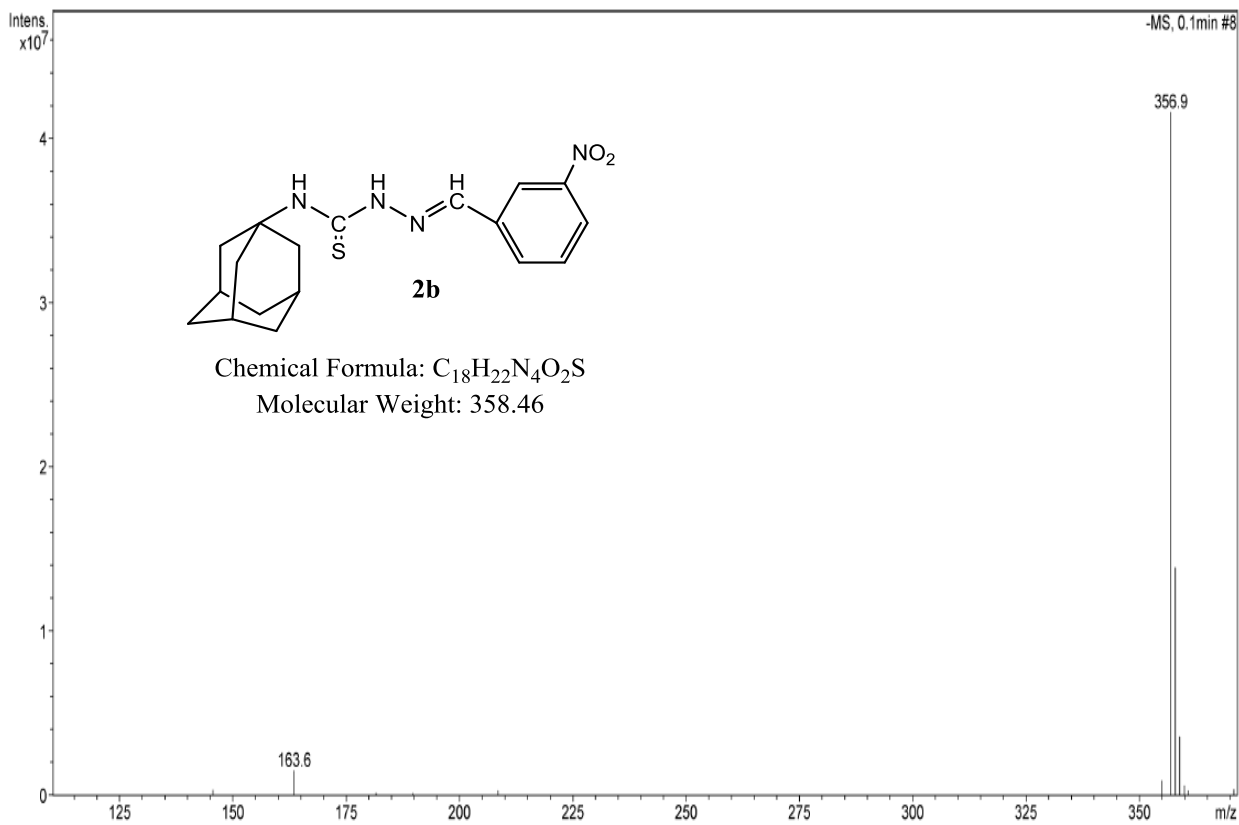

ESI-MS spectrum of compound **2b** (positive)

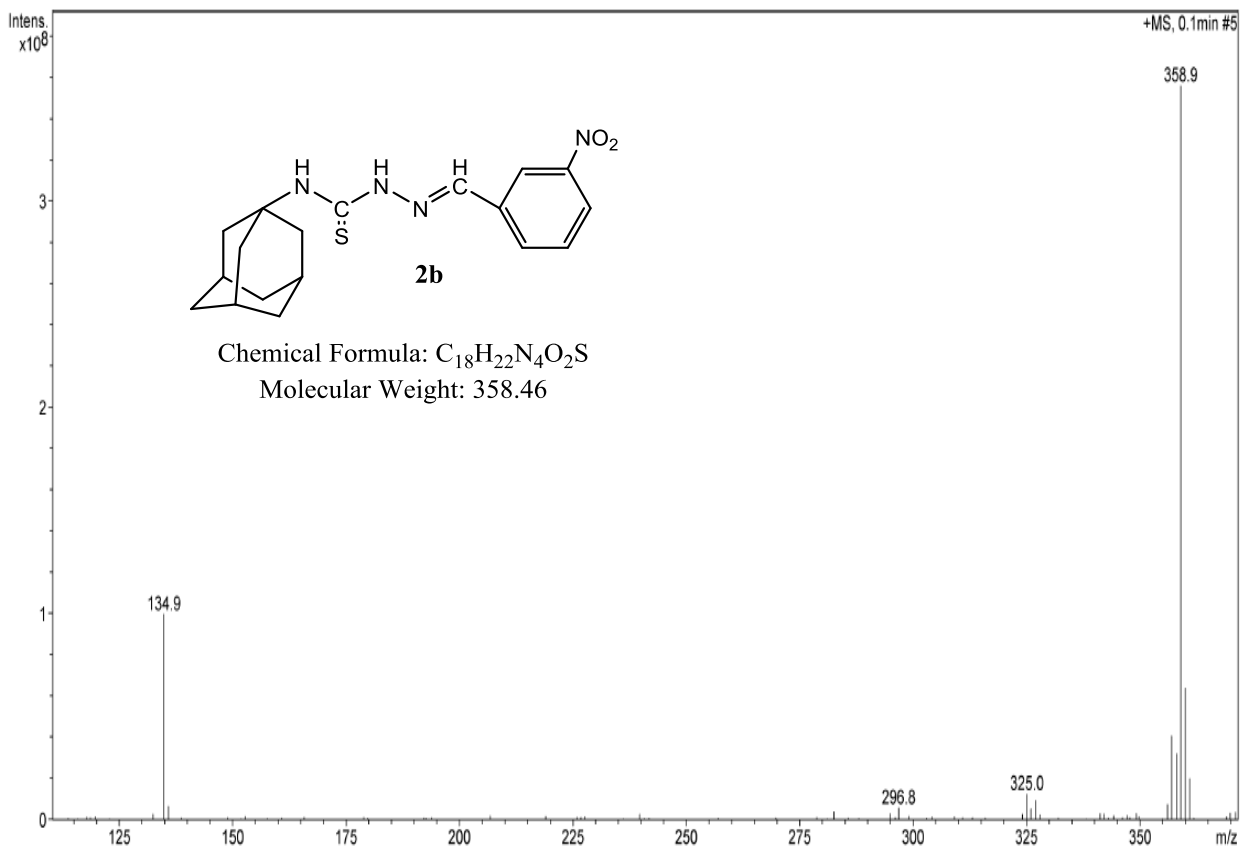

<sup>1</sup>H-NMR spectrum of compound 2c

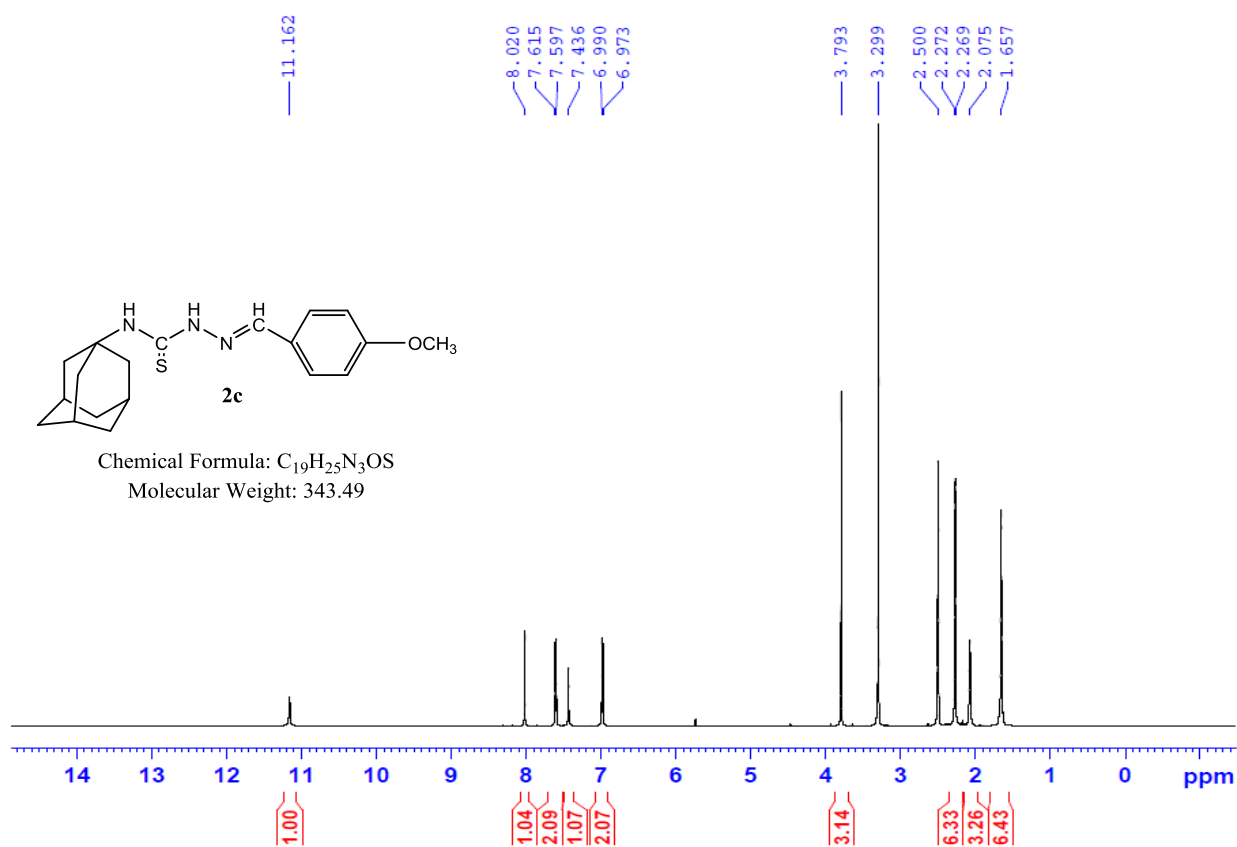

<sup>13</sup>C-NMR spectrum of compound 2c

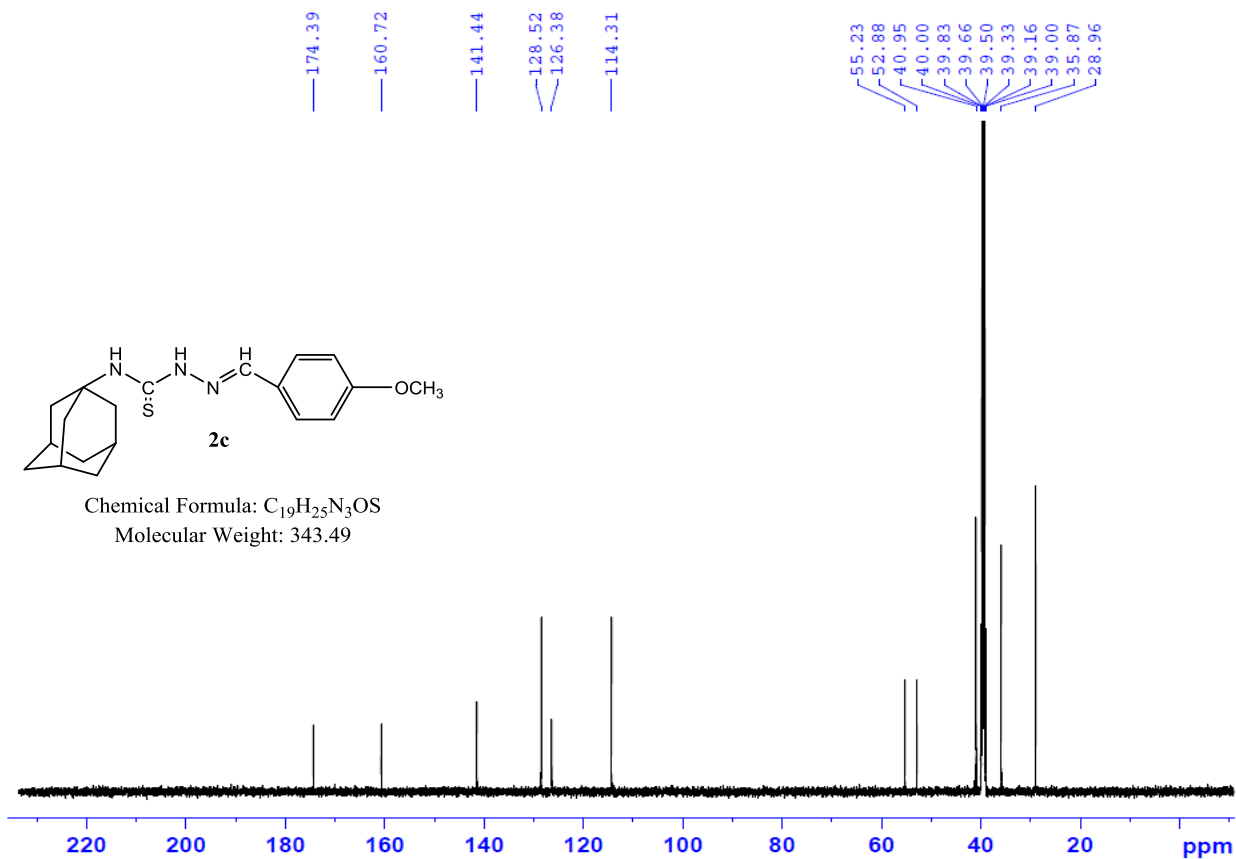

ESI-MS spectrum of compound **2c** (negative)

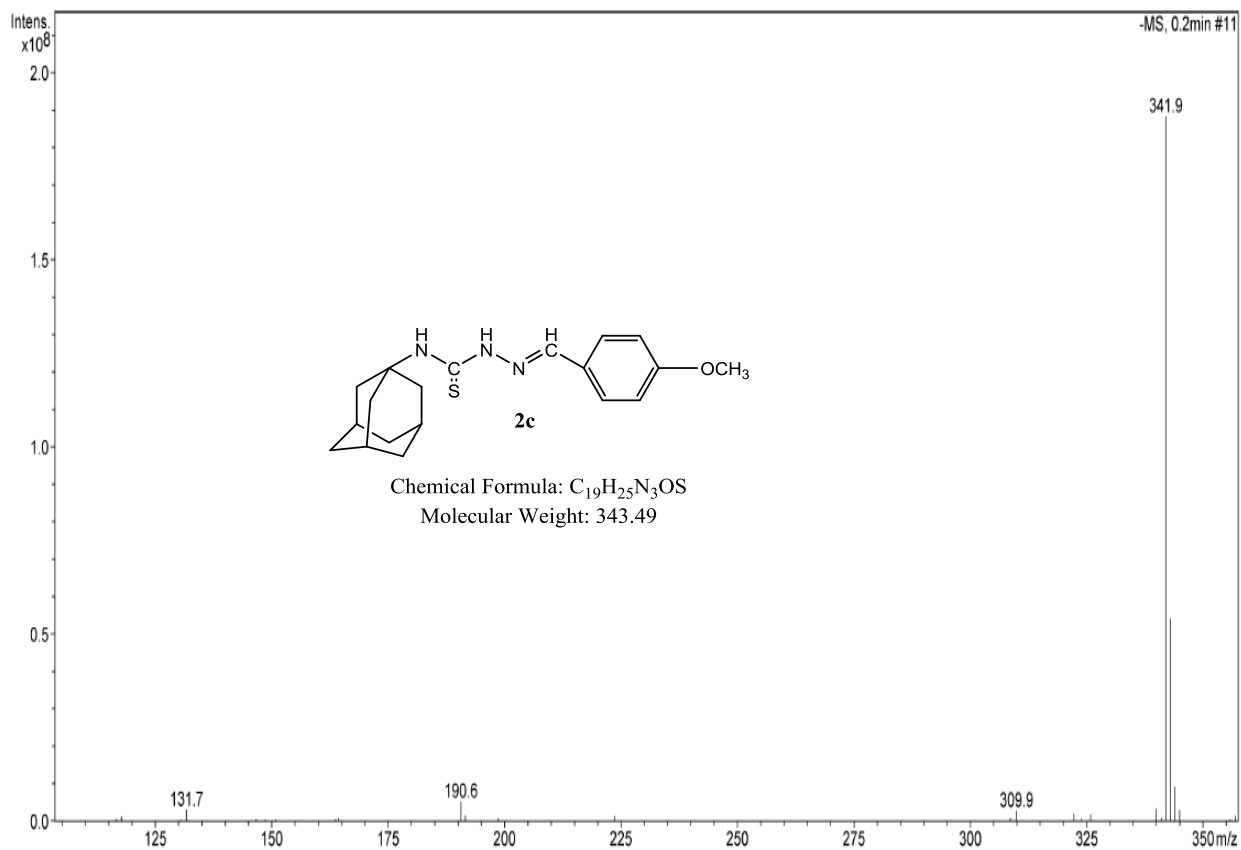

ESI-MS spectrum of compound **2c** (positive)

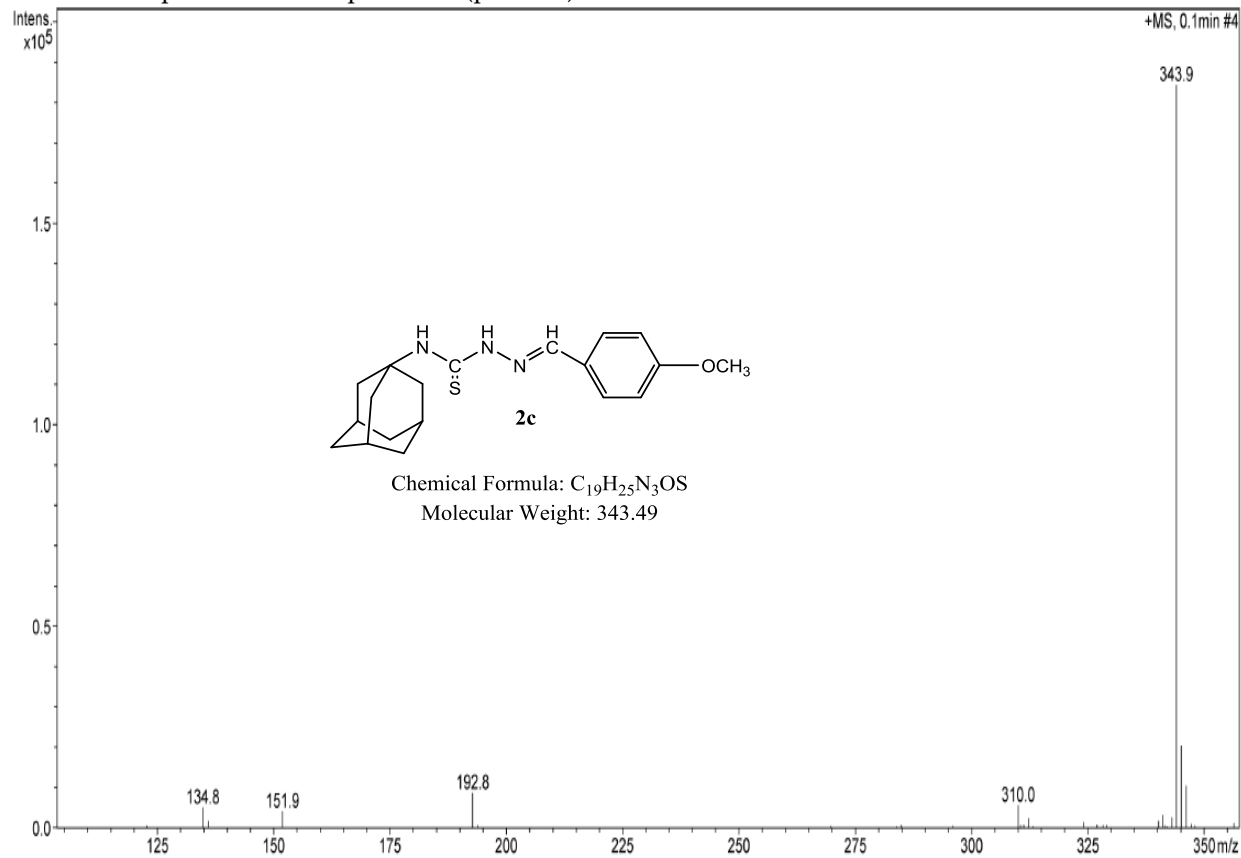

<sup>1</sup>H-NMR spectrum of compound **2d**

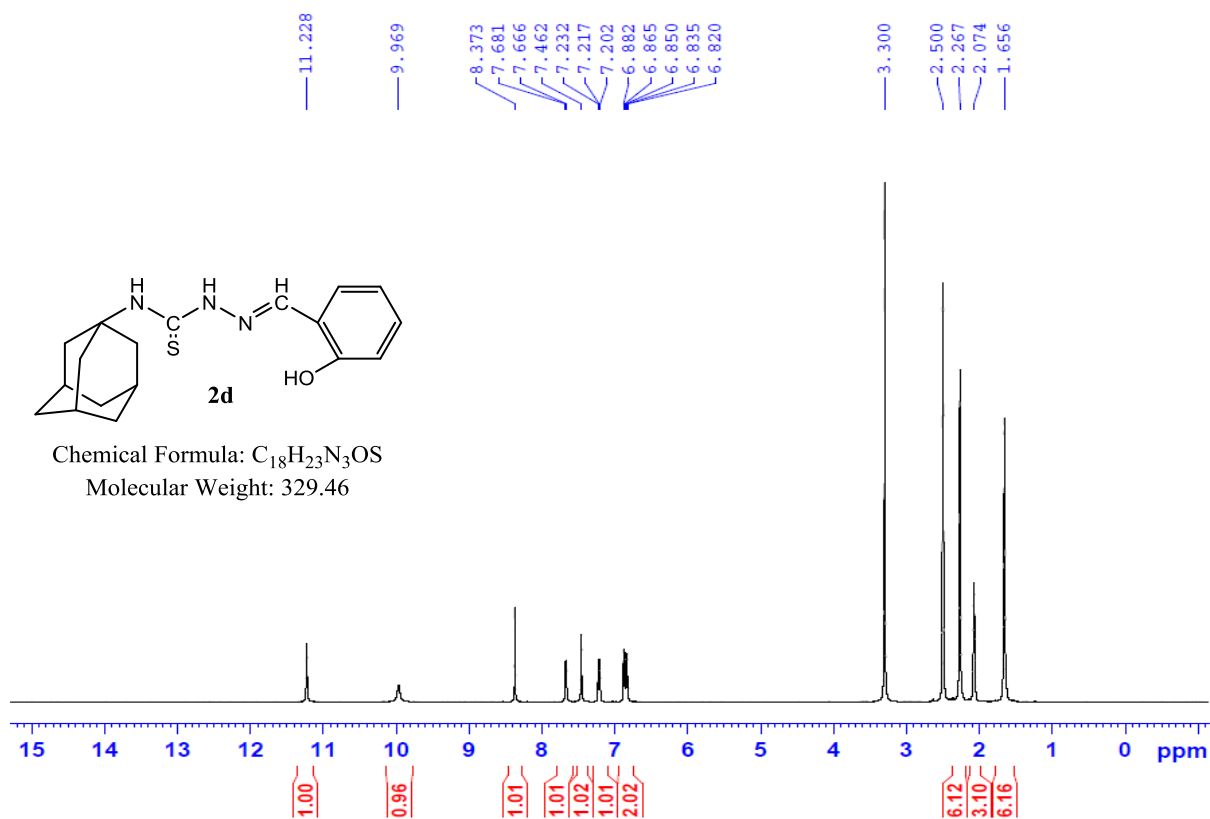

Chemical Formula: C<sub>18</sub>H<sub>23</sub>N<sub>3</sub>OS

Molecular Weight: 329.46

<sup>13</sup>C-NMR spectrum of compound **2d**

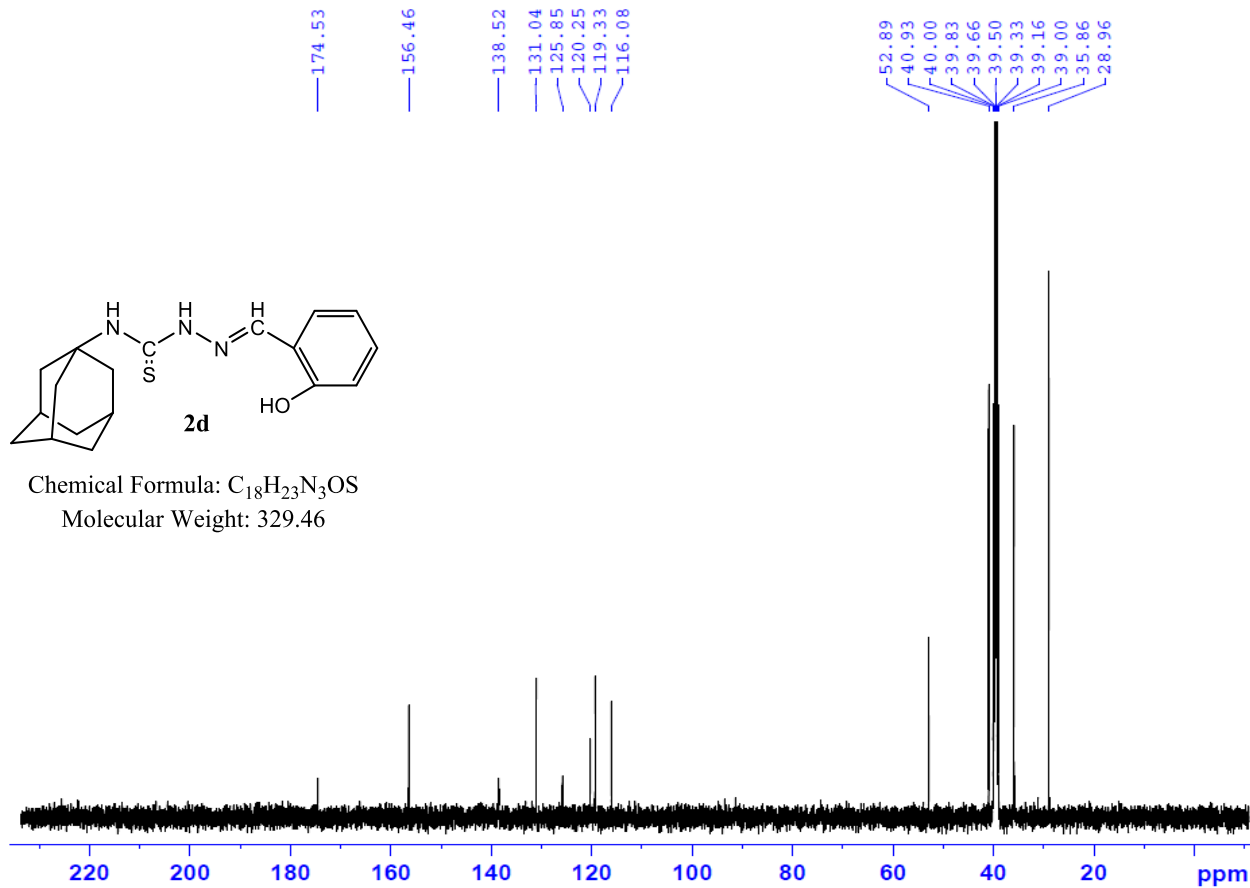

Chemical Formula: C<sub>18</sub>H<sub>23</sub>N<sub>3</sub>OS

Molecular Weight: 329.46



ESI-MS spectrum of compound **2d** (negative)

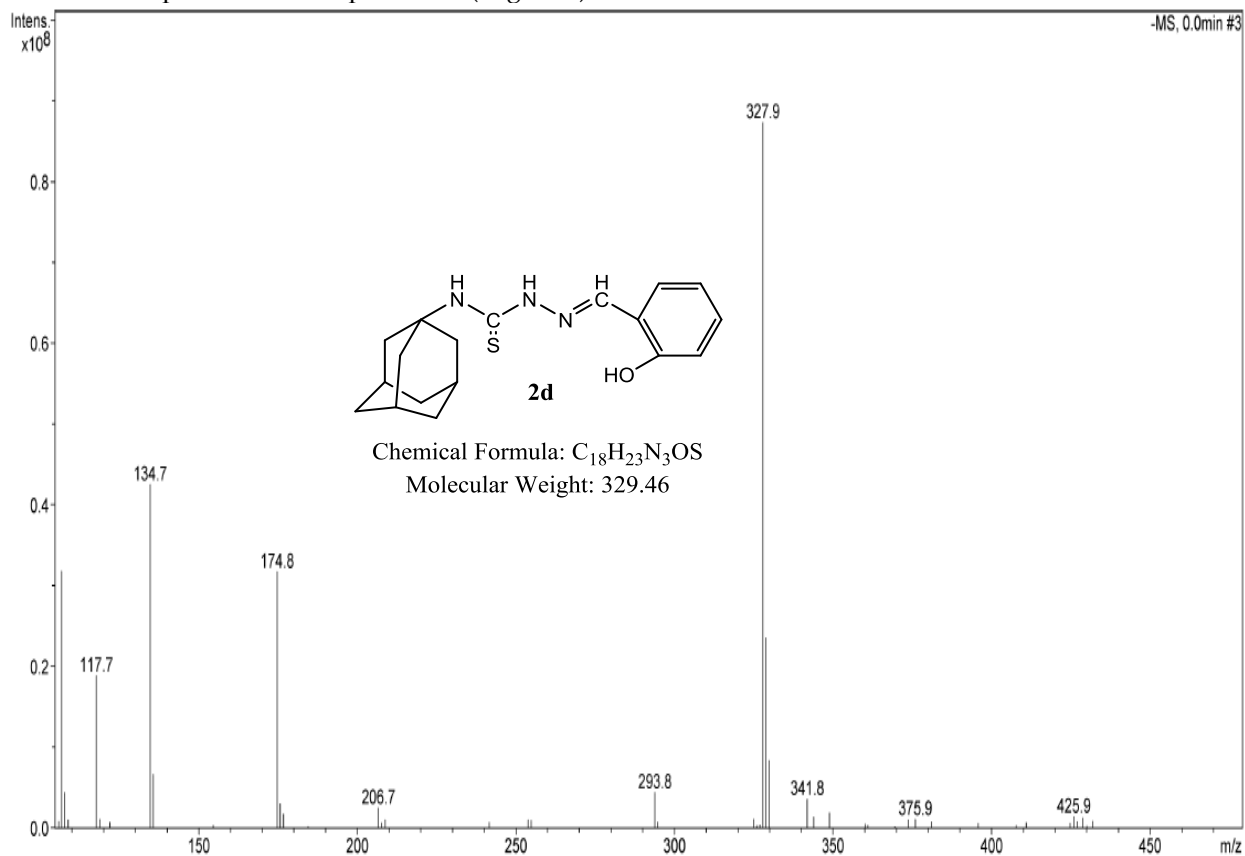

ESI-MS spectrum of compound **2d** (positive)

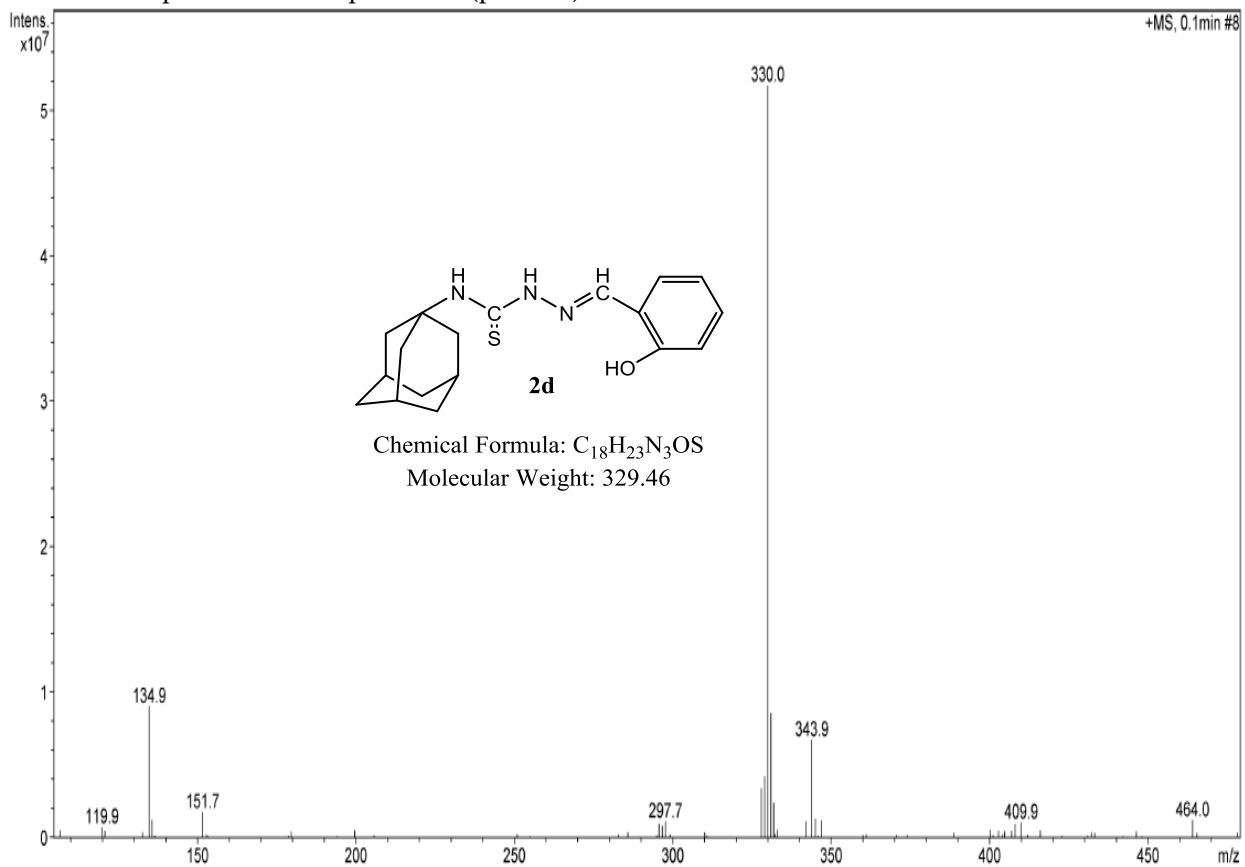

<sup>1</sup>H-NMR spectrum of compound **2e**

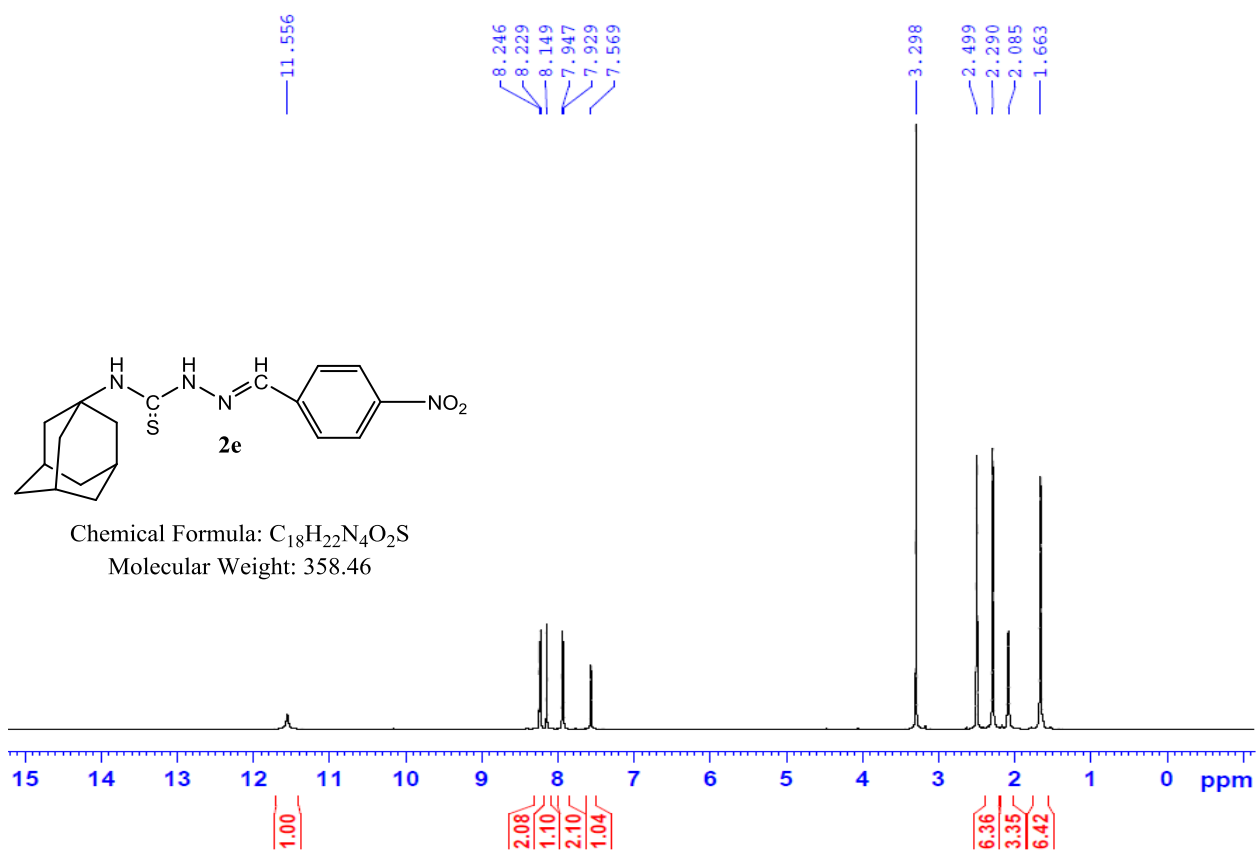

Chemical Formula: C<sub>18</sub>H<sub>22</sub>N<sub>4</sub>O<sub>2</sub>S  
Molecular Weight: 358.46

<sup>13</sup>C-NMR spectrum of compound **2e**

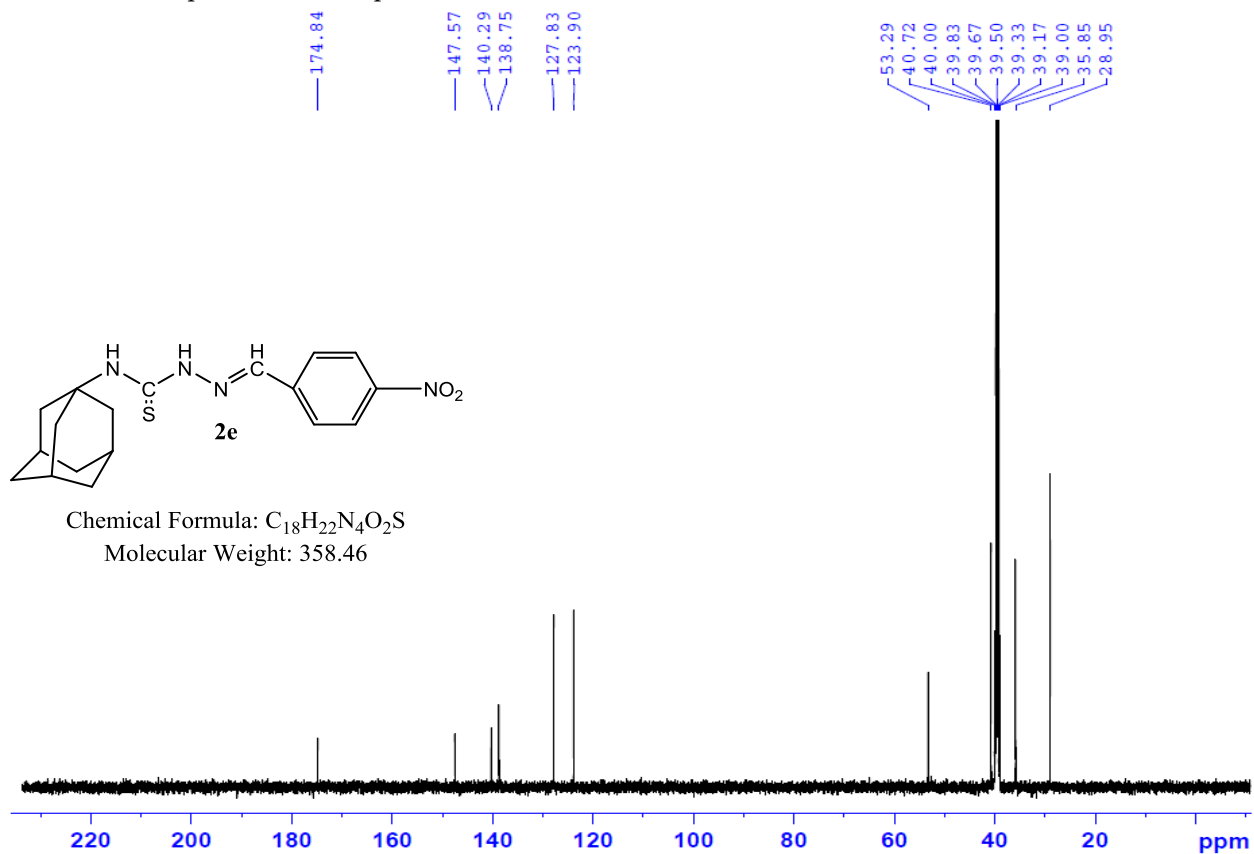

Chemical Formula: C<sub>18</sub>H<sub>22</sub>N<sub>4</sub>O<sub>2</sub>S  
Molecular Weight: 358.46

ESI-MS spectrum of compound **2e** (negative)

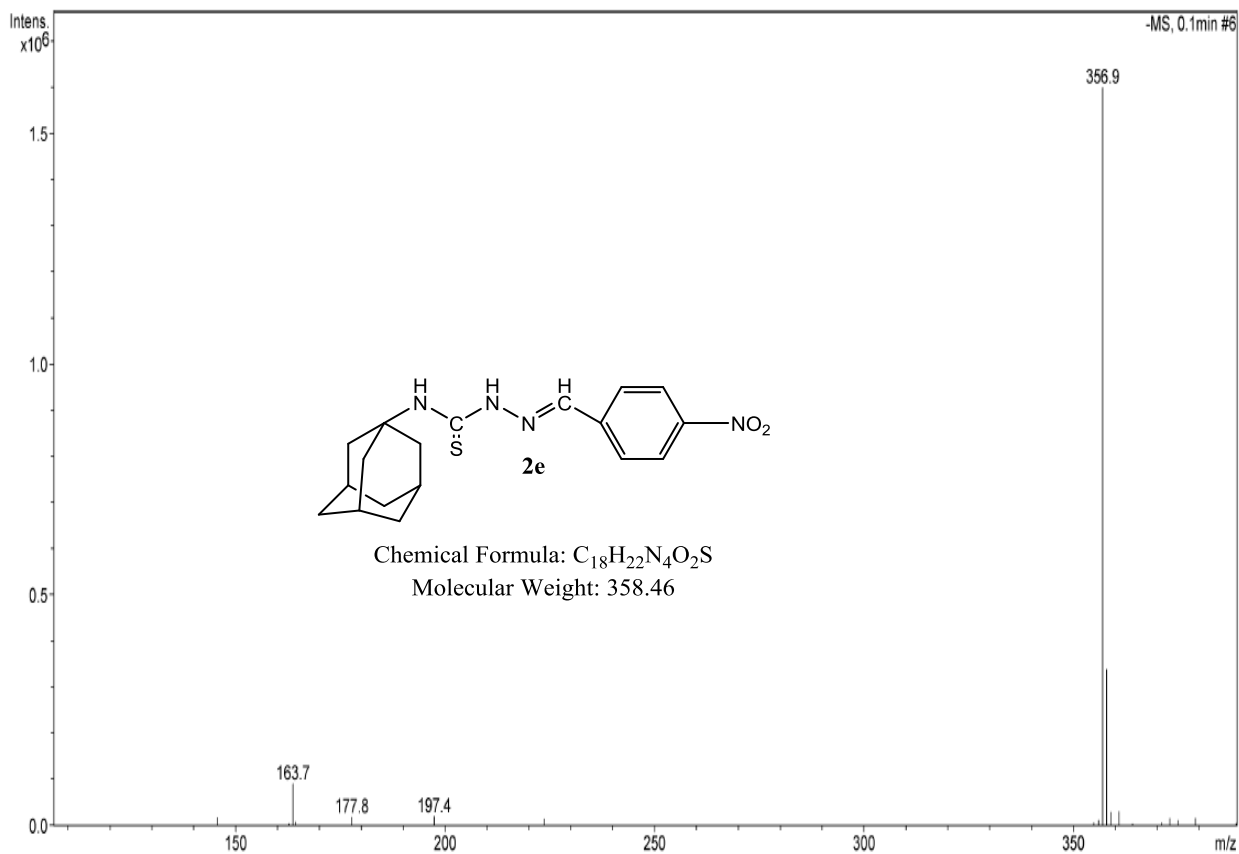

ESI-MS spectrum of compound **2e** (positive)

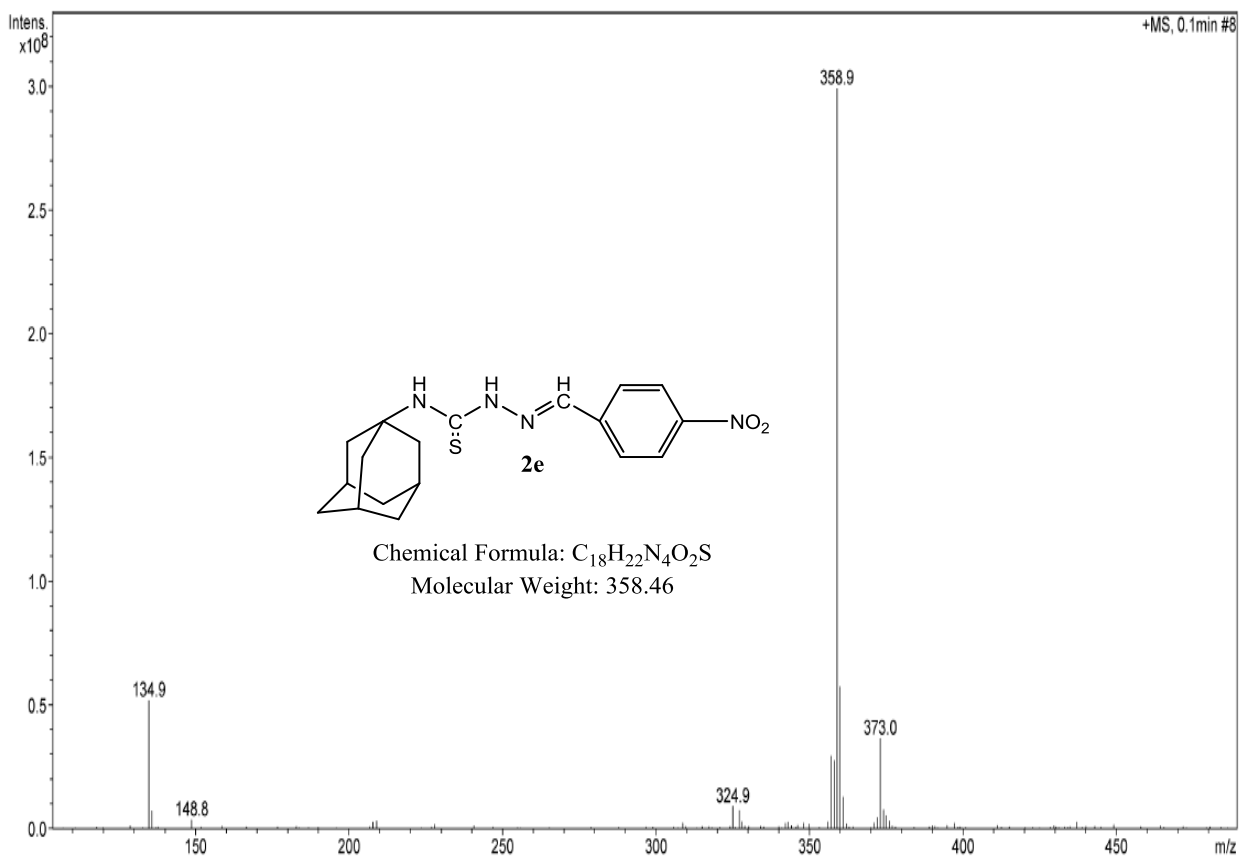

<sup>1</sup>H-NMR spectrum of compound **2f**

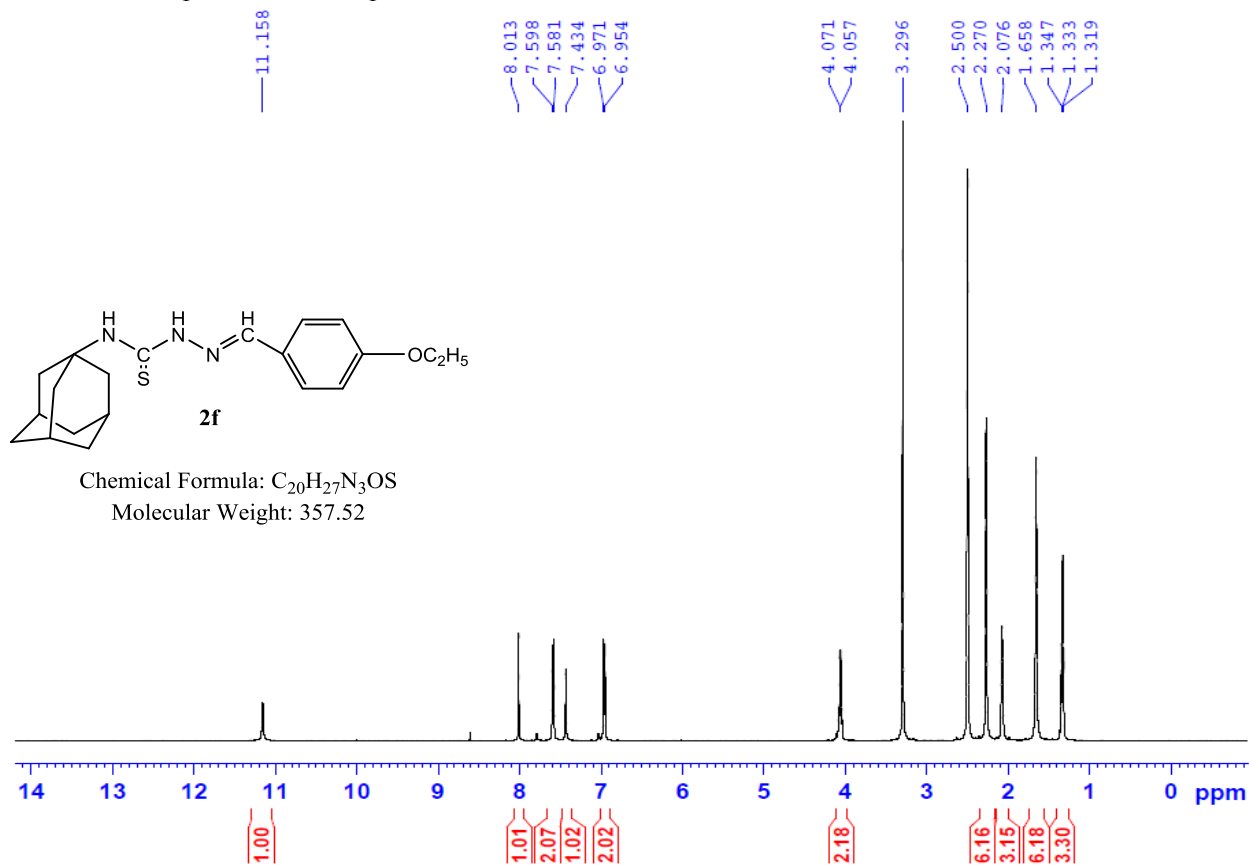

<sup>13</sup>C-NMR spectrum of compound **2f**

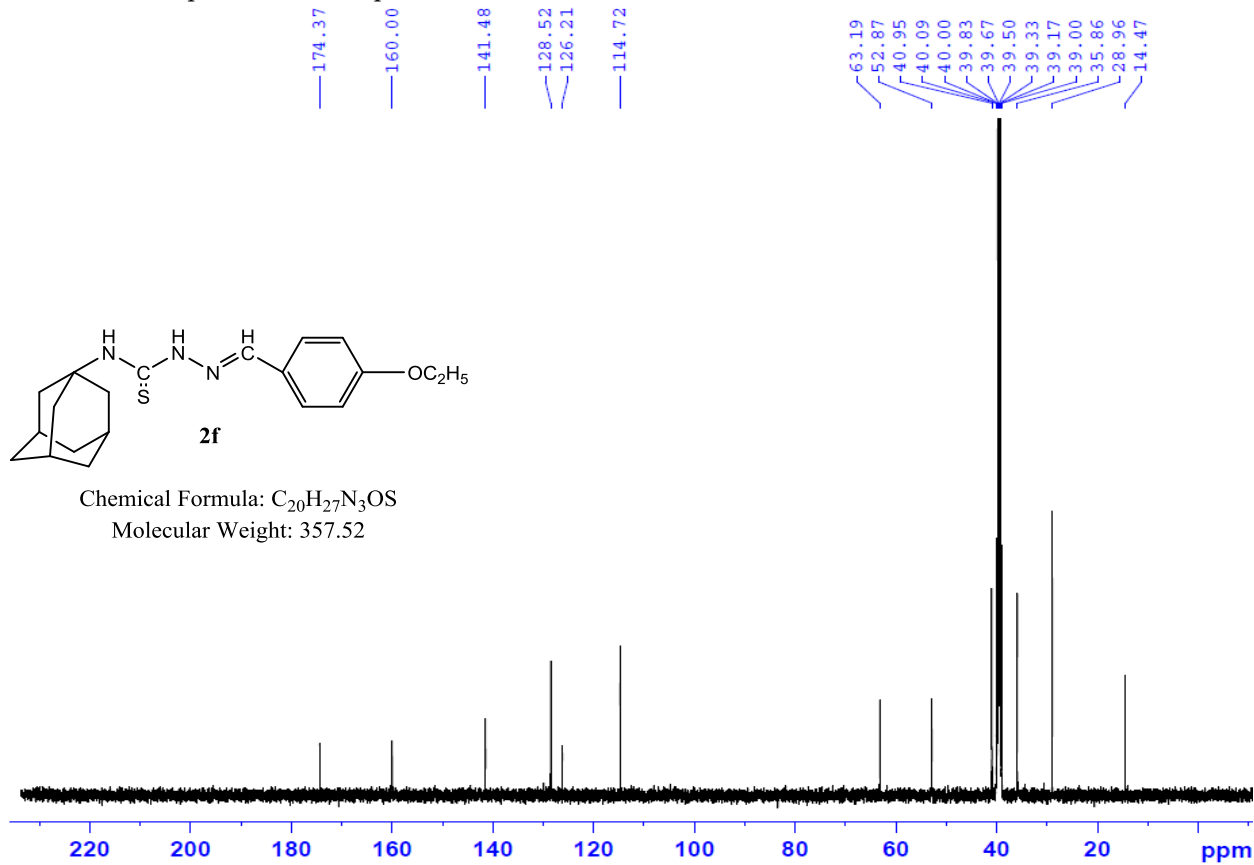

ESI-MS spectrum of compound **2f** (negative)

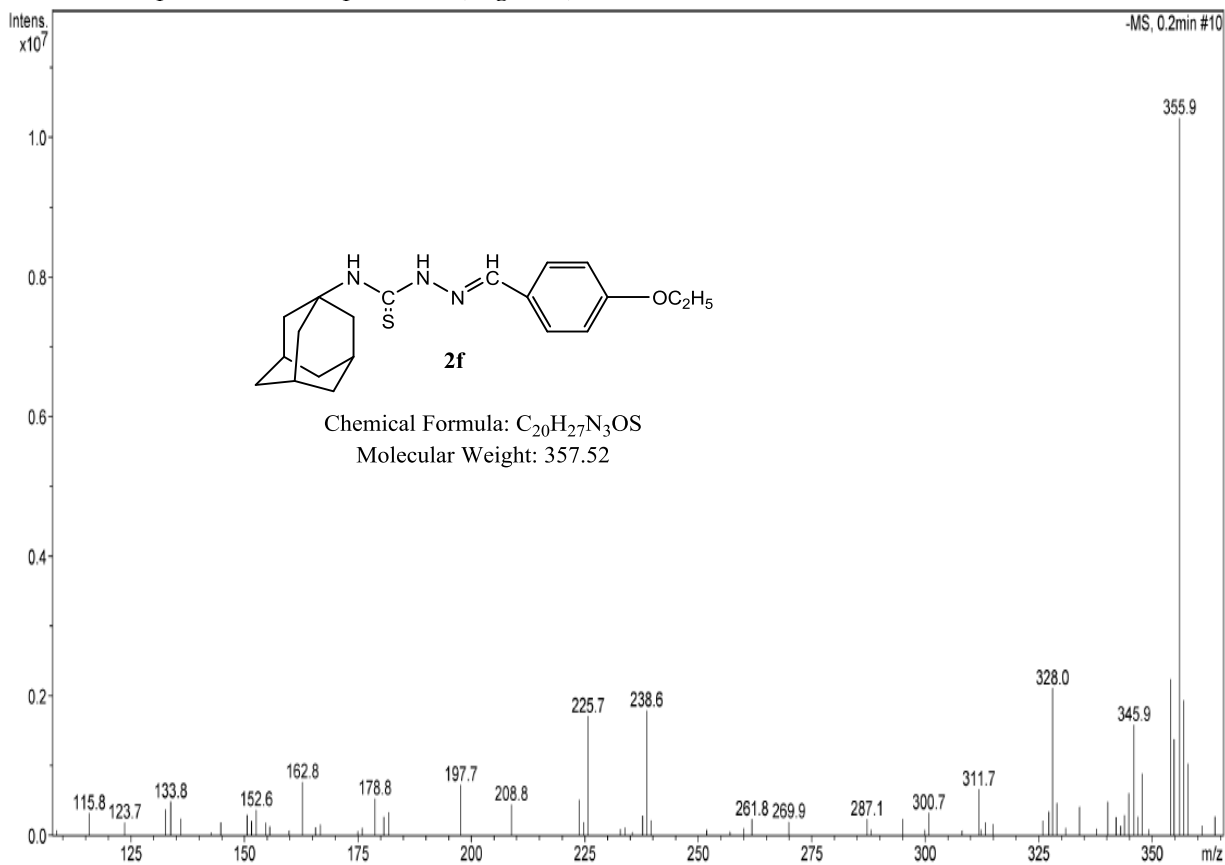

ESI-MS spectrum of compound **2f** (positive)

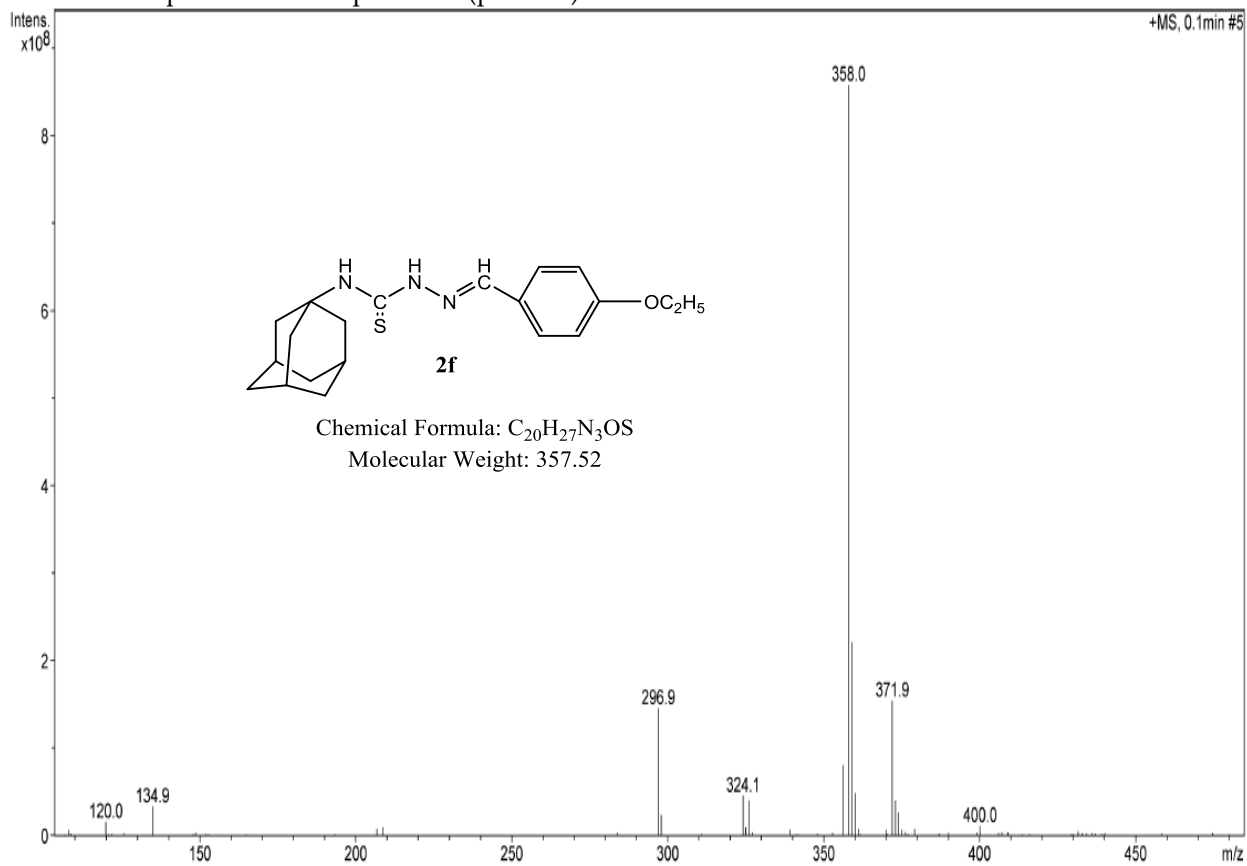

<sup>1</sup>H-NMR spectrum of compound **2g**

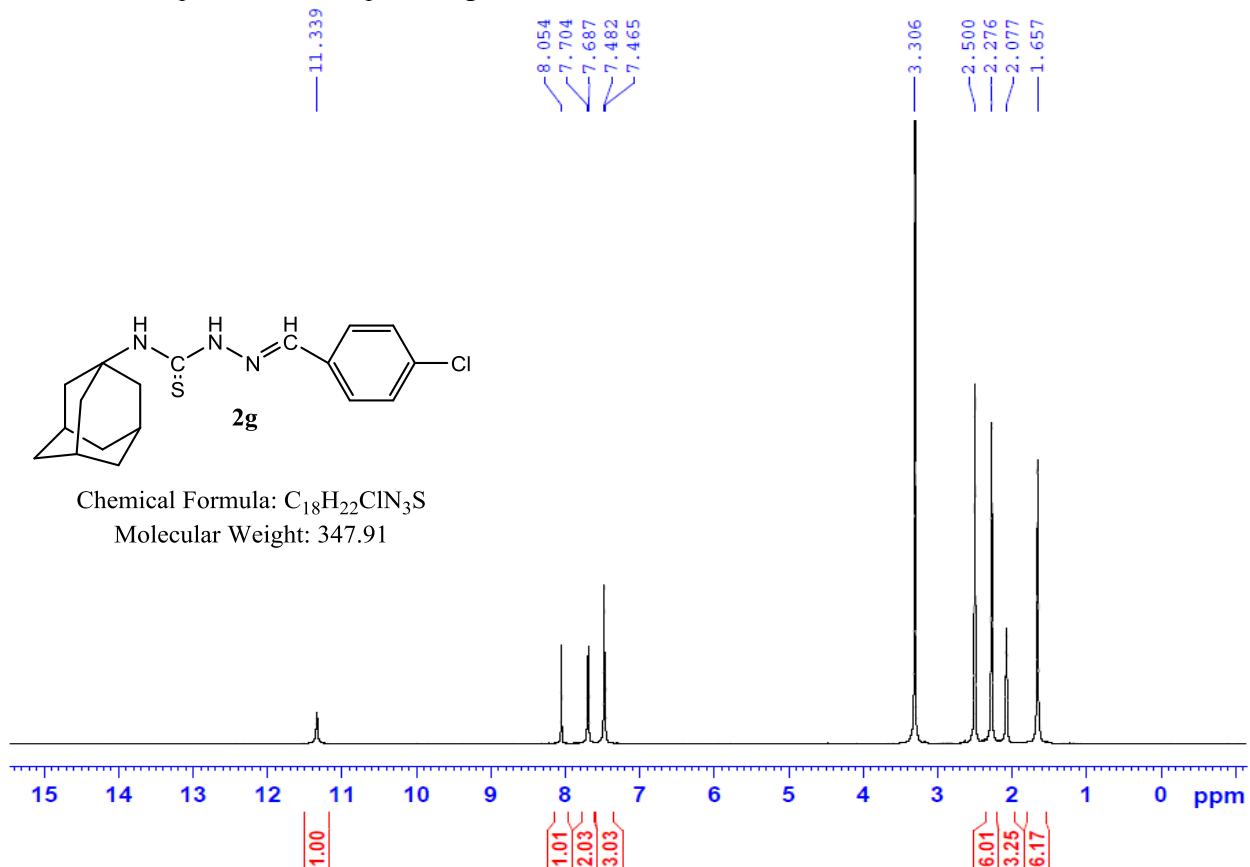

Chemical Formula: C<sub>18</sub>H<sub>22</sub>ClN<sub>3</sub>S  
Molecular Weight: 347.91

<sup>13</sup>C-NMR spectrum of compound **2g**

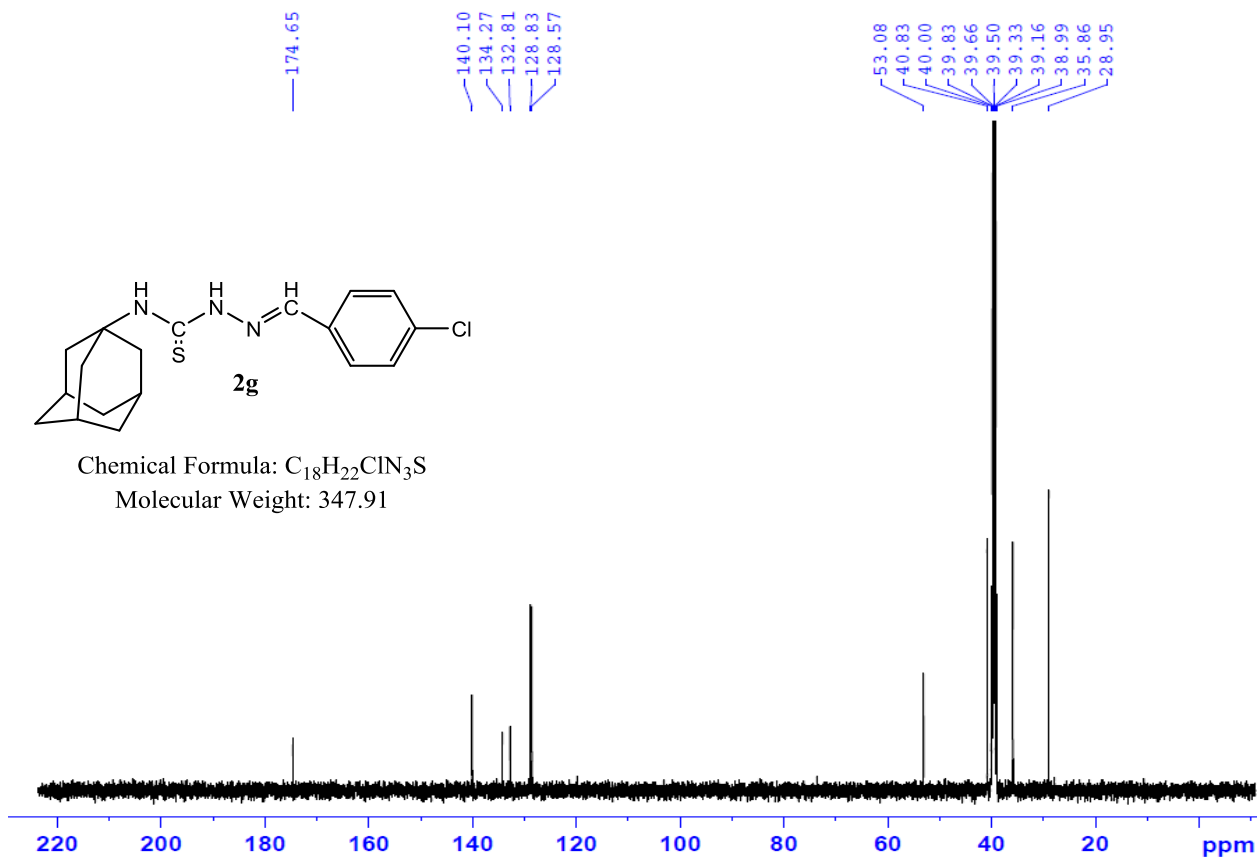

Chemical Formula: C<sub>18</sub>H<sub>22</sub>ClN<sub>3</sub>S  
Molecular Weight: 347.91

ESI-MS spectrum of compound **2g** (negative)

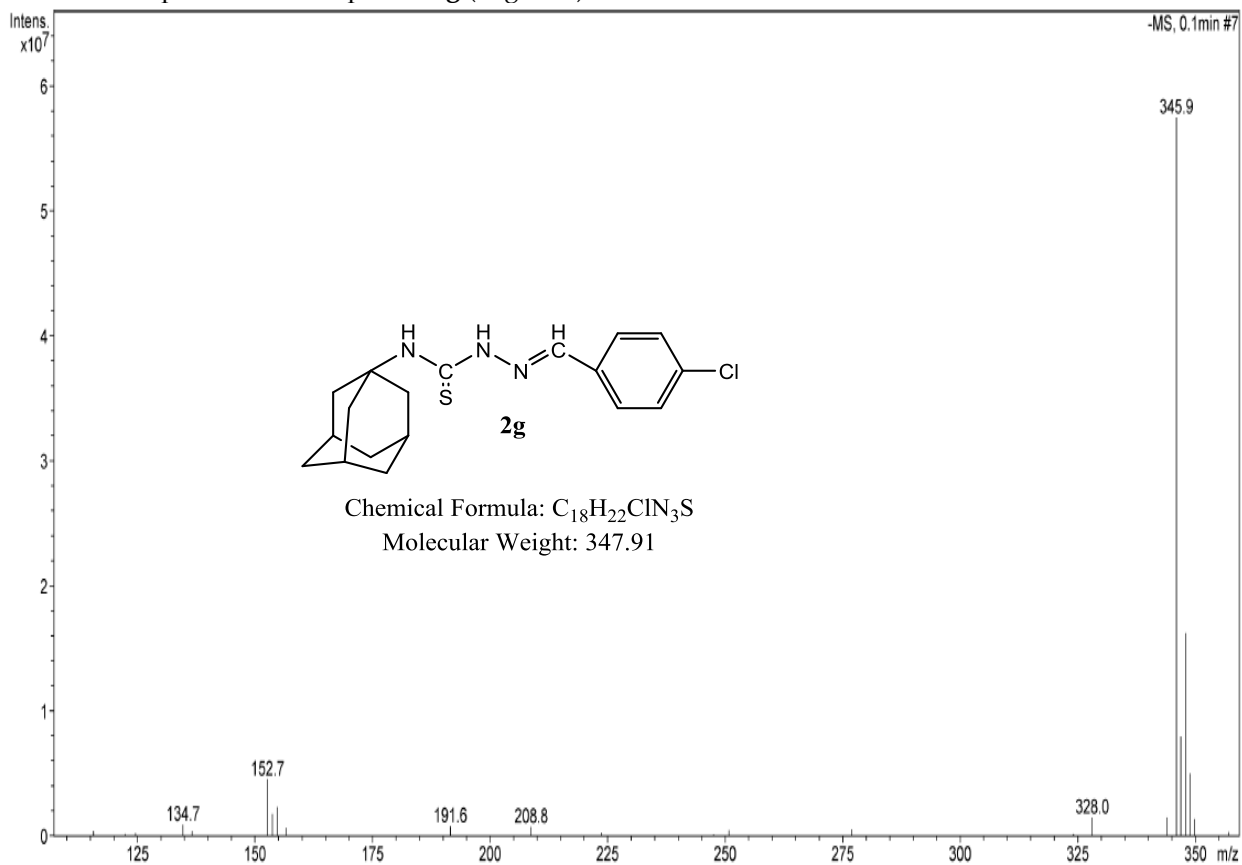

ESI-MS spectrum of compound **2g** (positive)

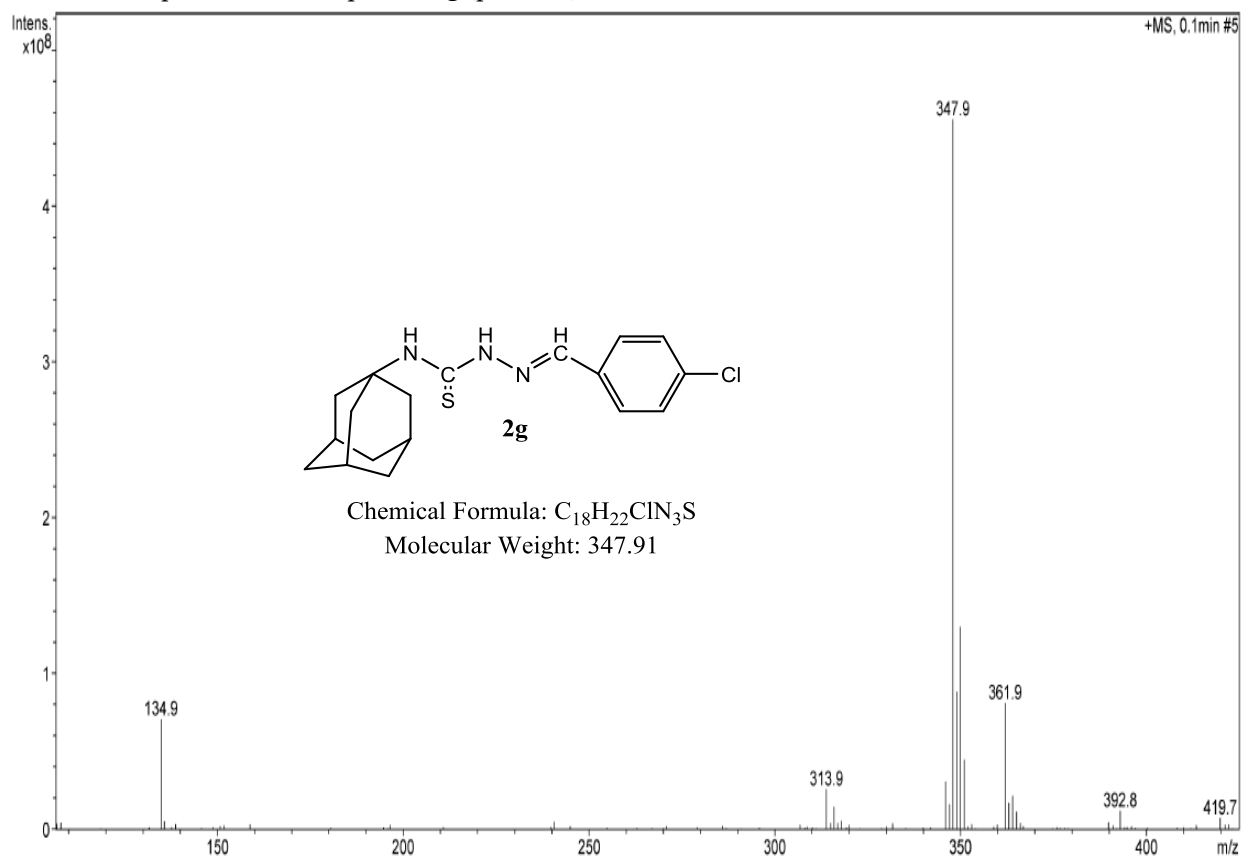

<sup>1</sup>H-NMR spectrum of compound **2h**

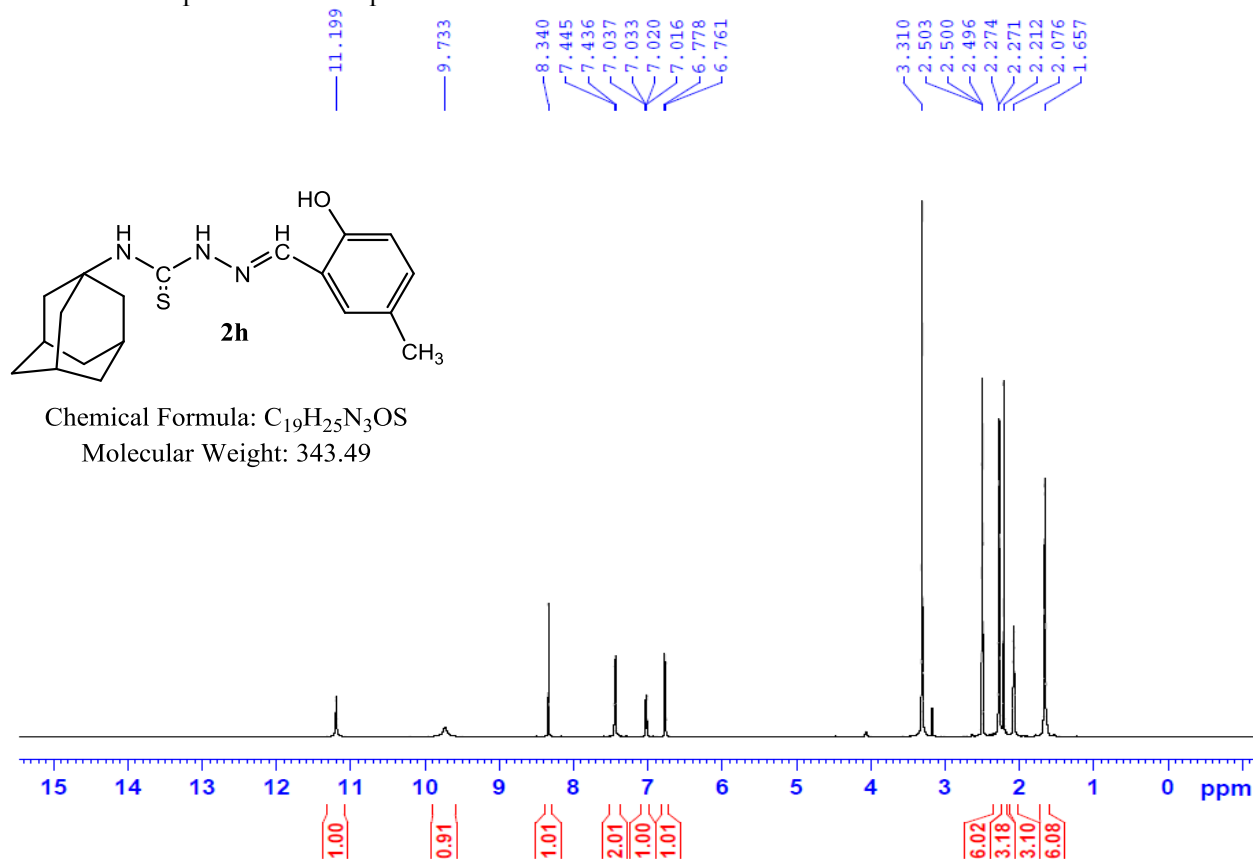

<sup>13</sup>C-NMR spectrum of compound **2h**

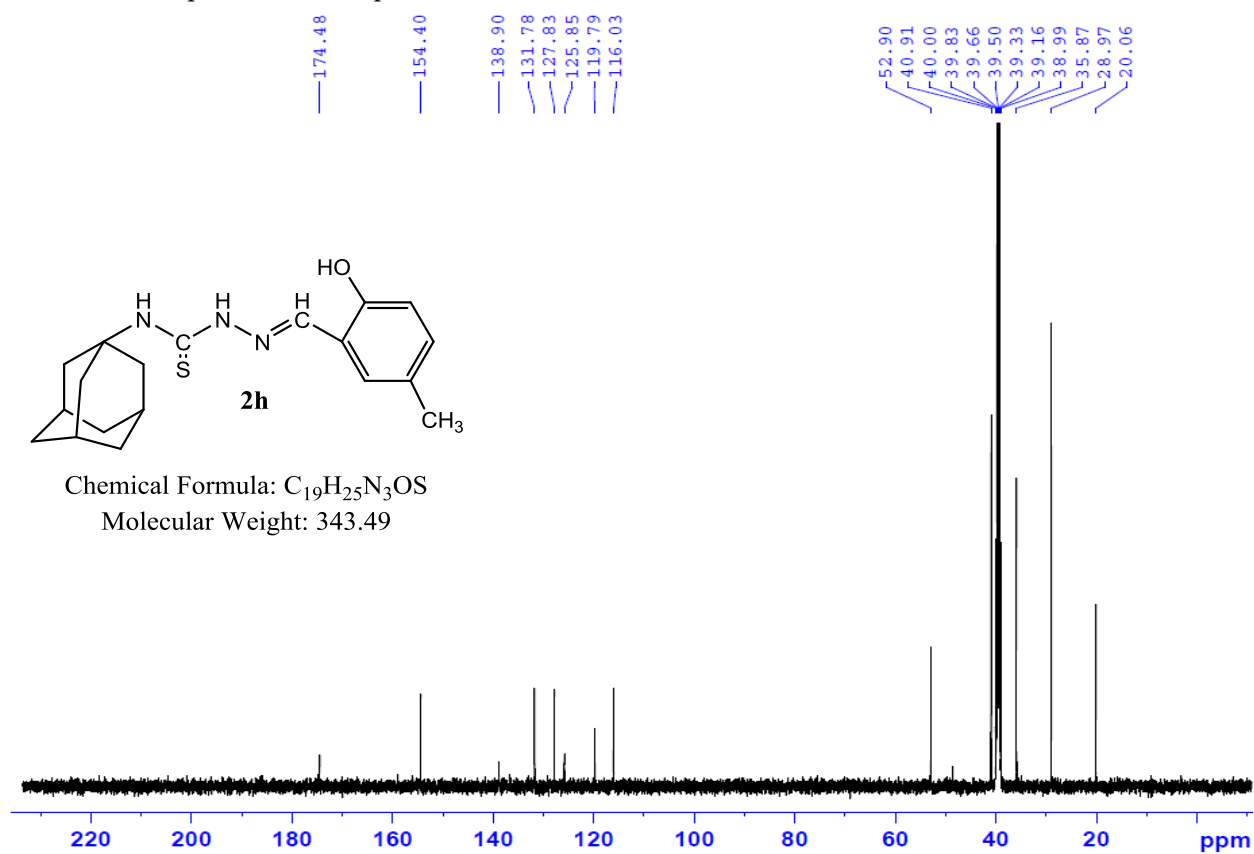



ESI-MS spectrum of compound **2h** (negative)

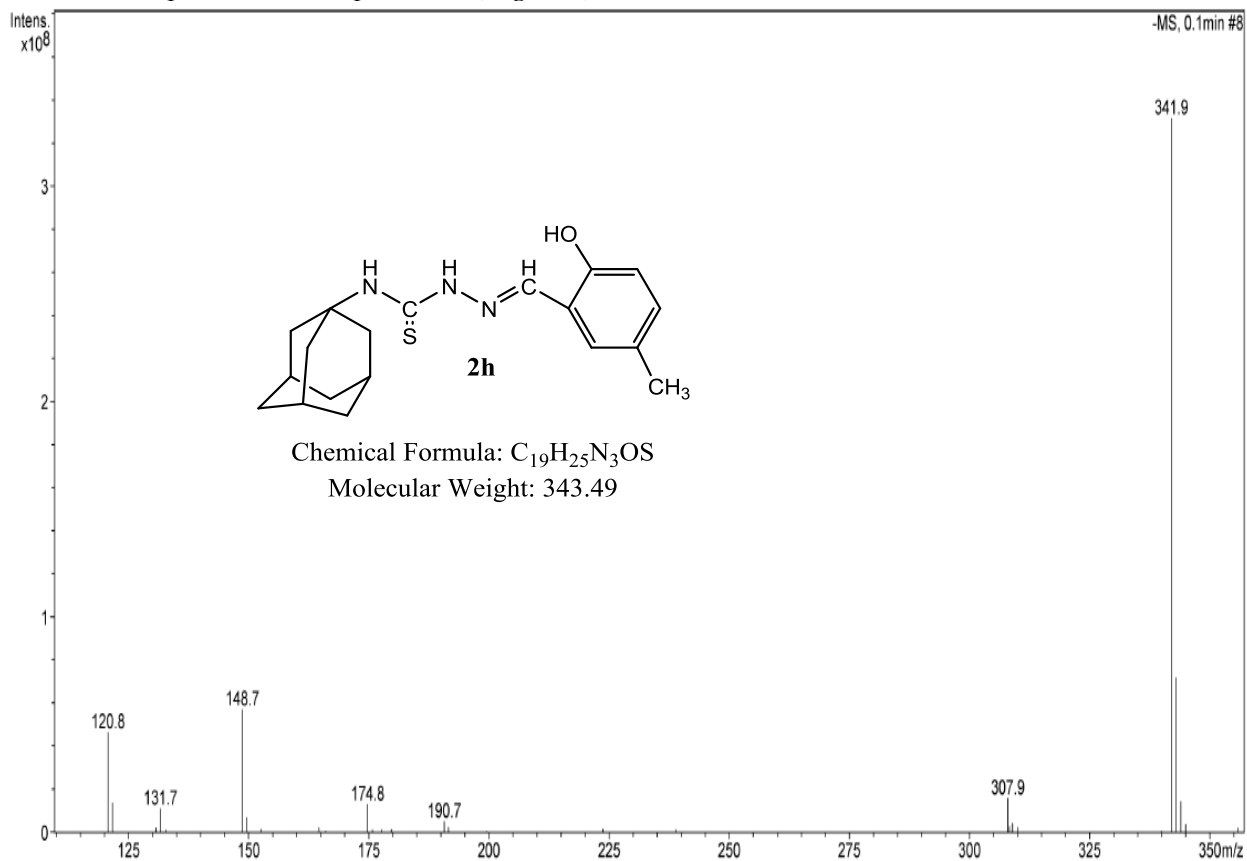

ESI-MS spectrum of compound **2h** (positive)

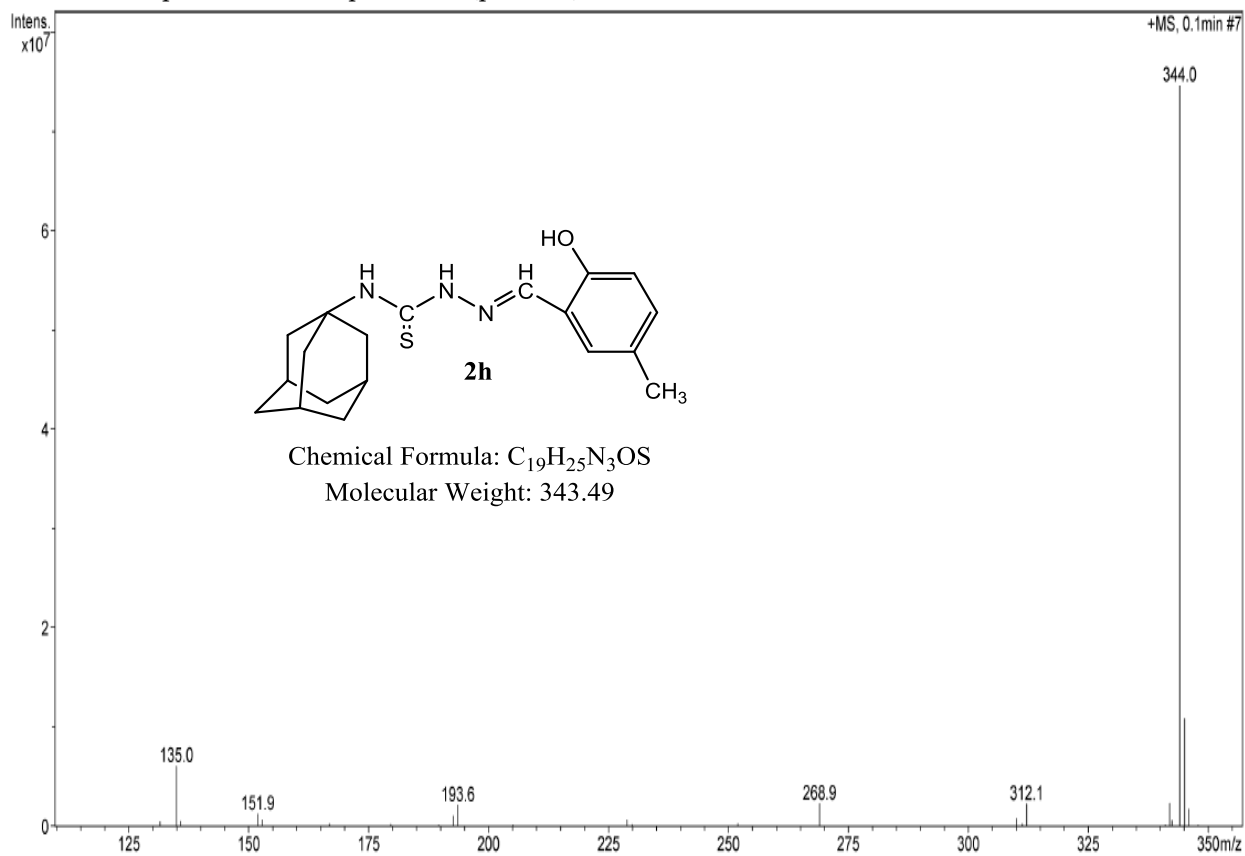

<sup>1</sup>H-NMR spectrum of compound **2i**

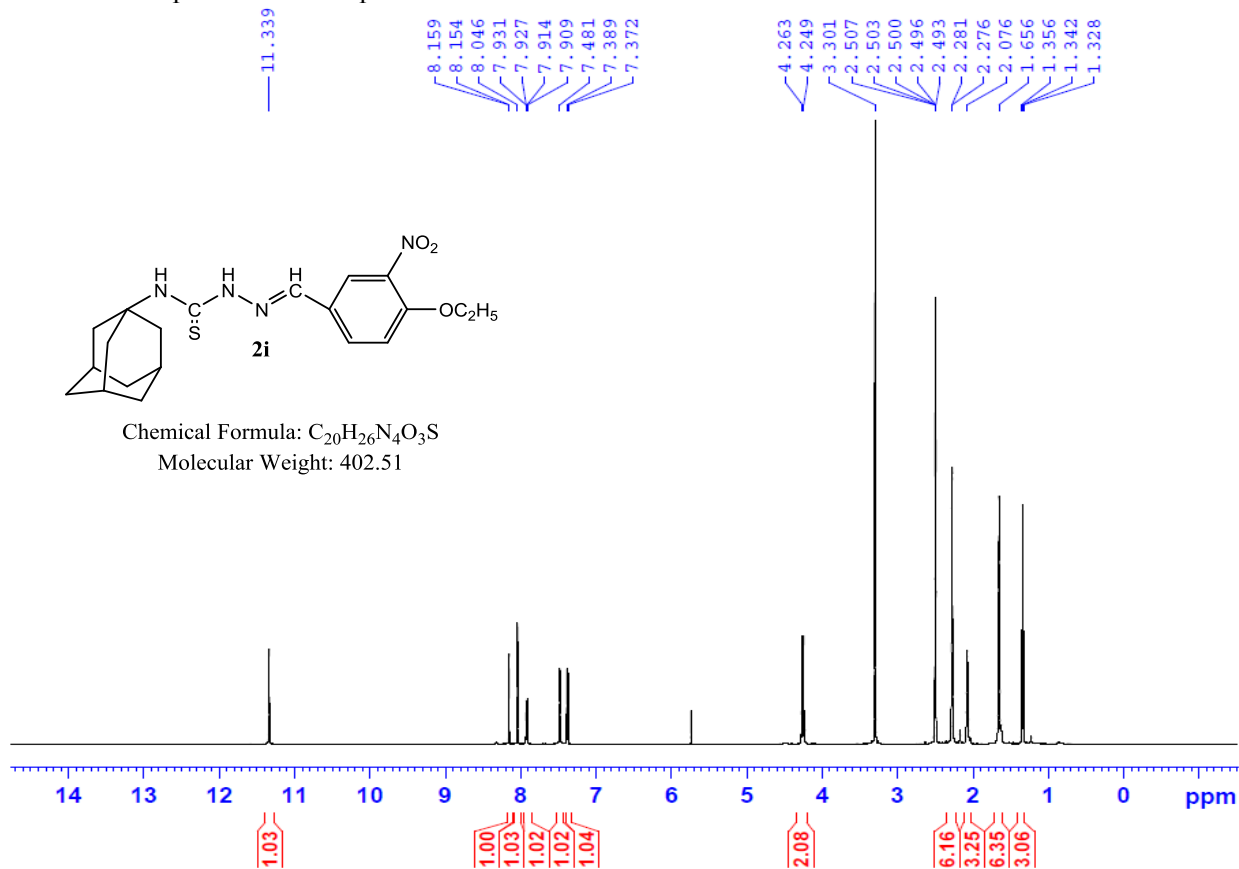

<sup>13</sup>C-NMR spectrum of compound **2i**

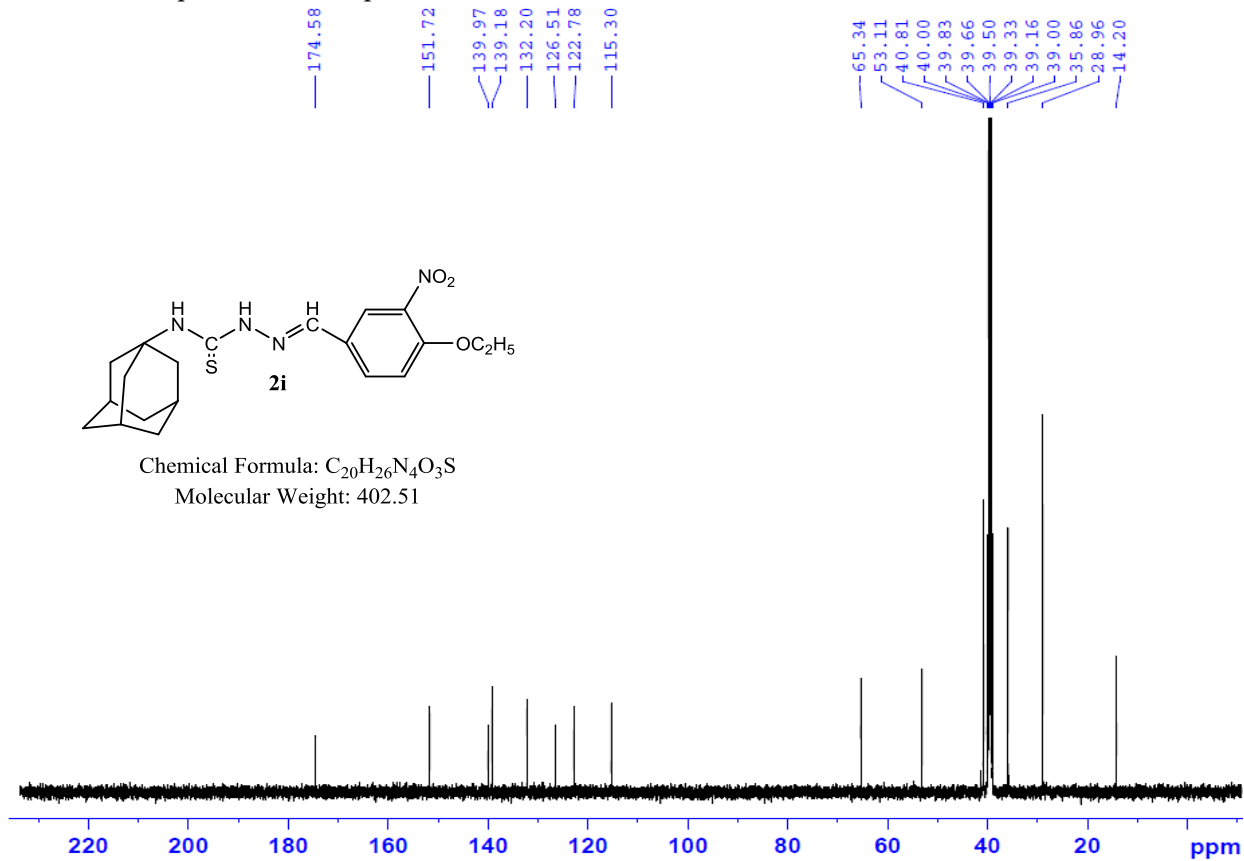

ESI-MS spectrum of compound **2i** (negative)

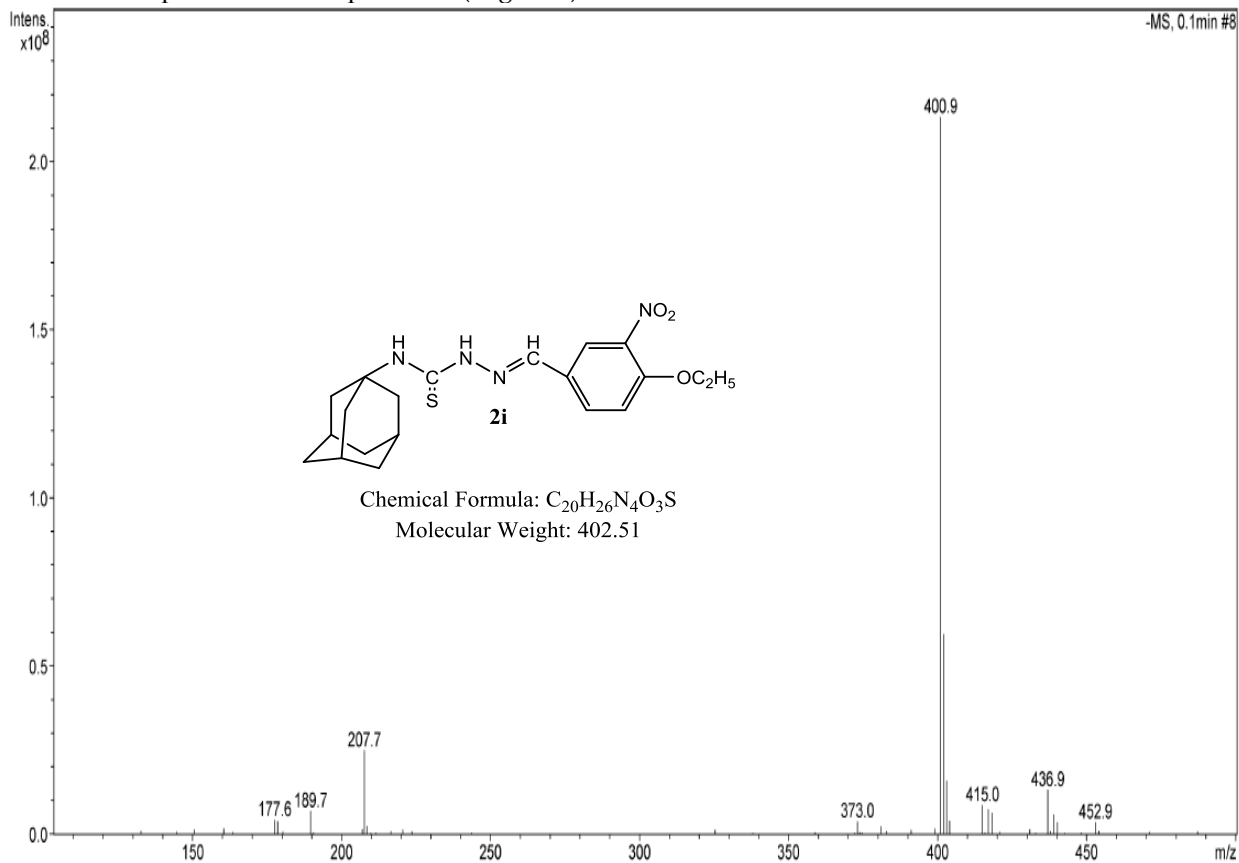

ESI-MS spectrum of compound **2i** (positive)

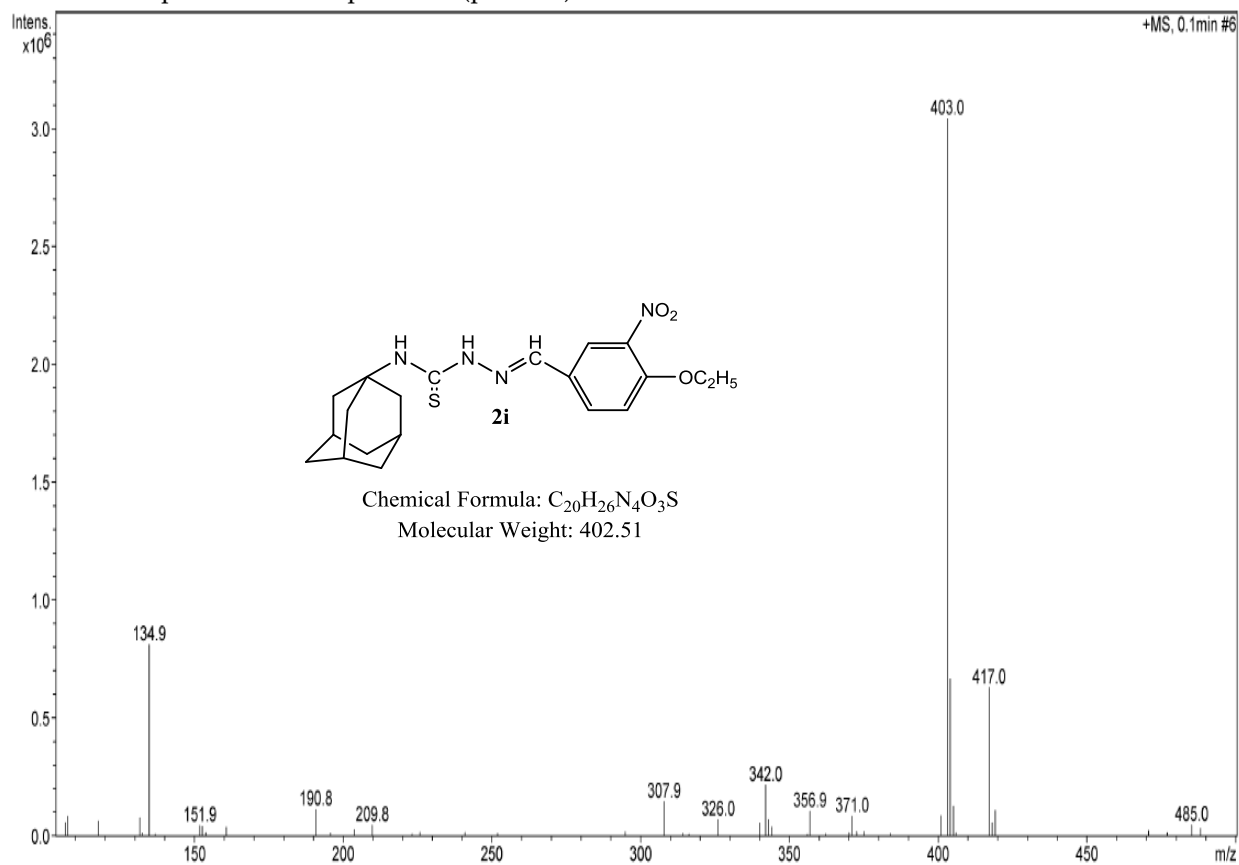

<sup>1</sup>H-NMR spectrum of compound **2j**

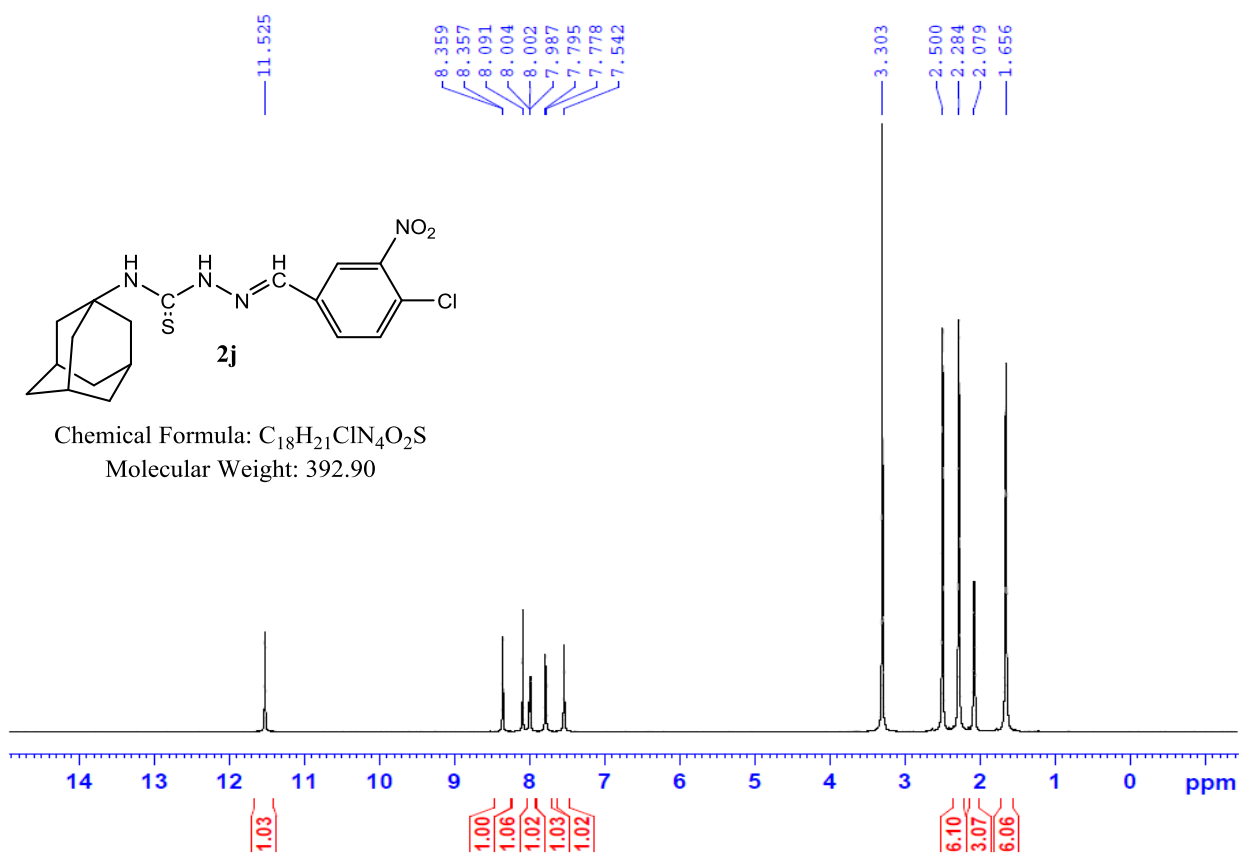

<sup>13</sup>C-NMR spectrum of compound **2j**

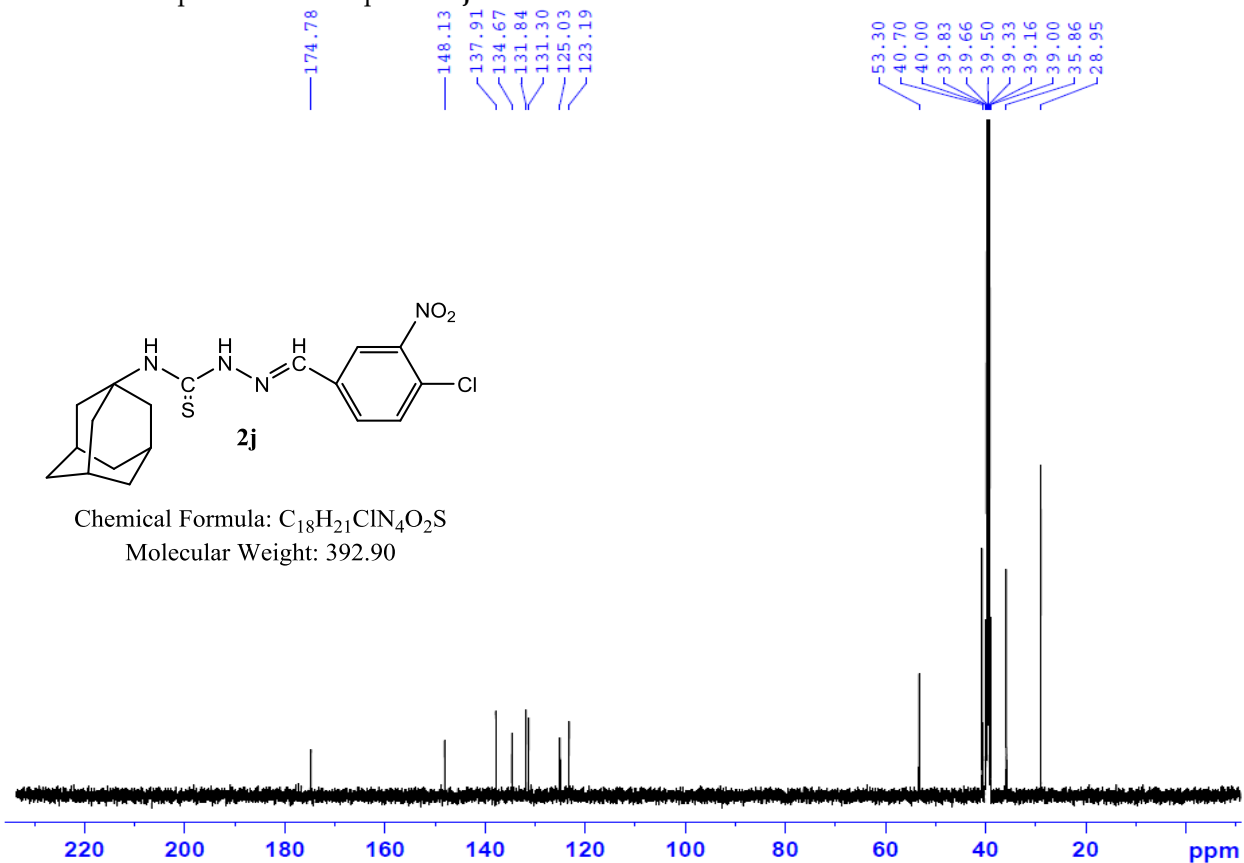

ESI-MS spectrum of compound **2j** (negative)

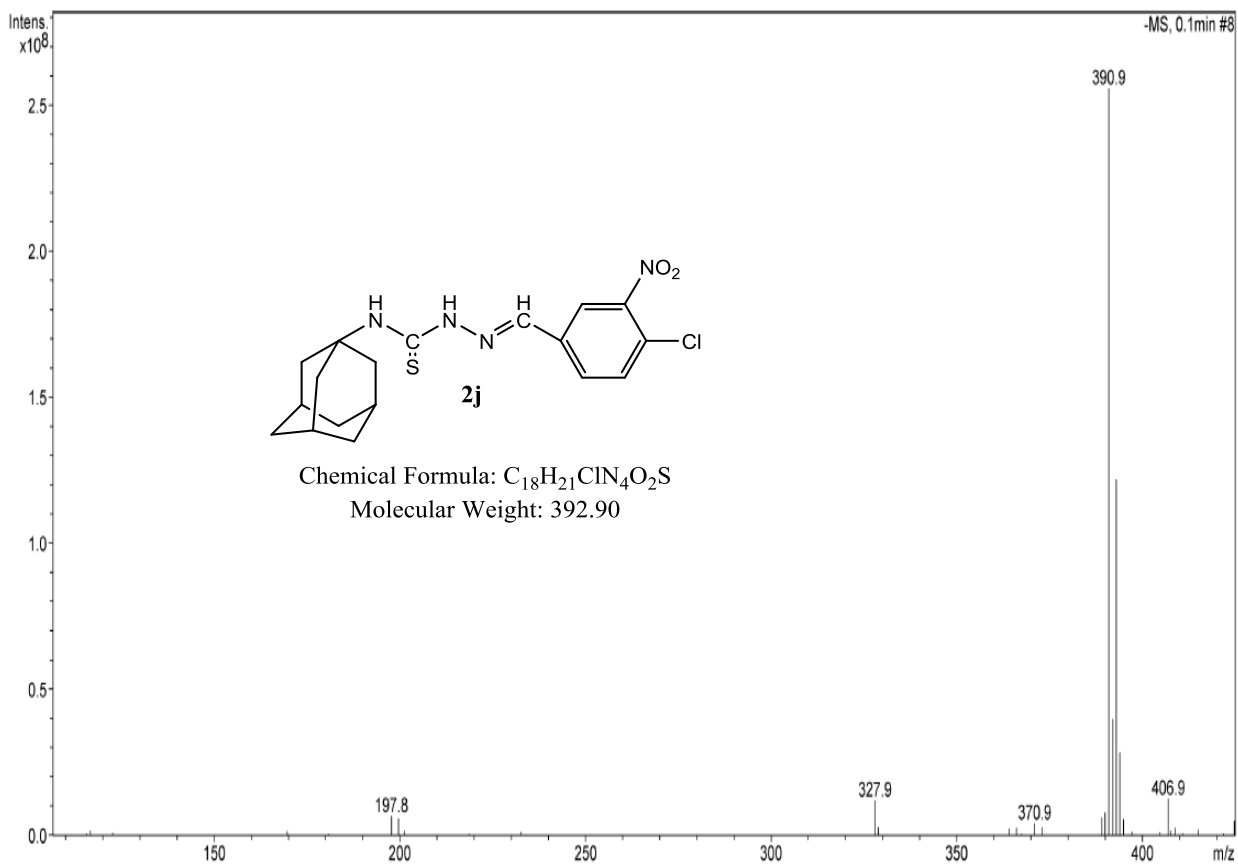

ESI-MS spectrum of compound **2j** (positive)

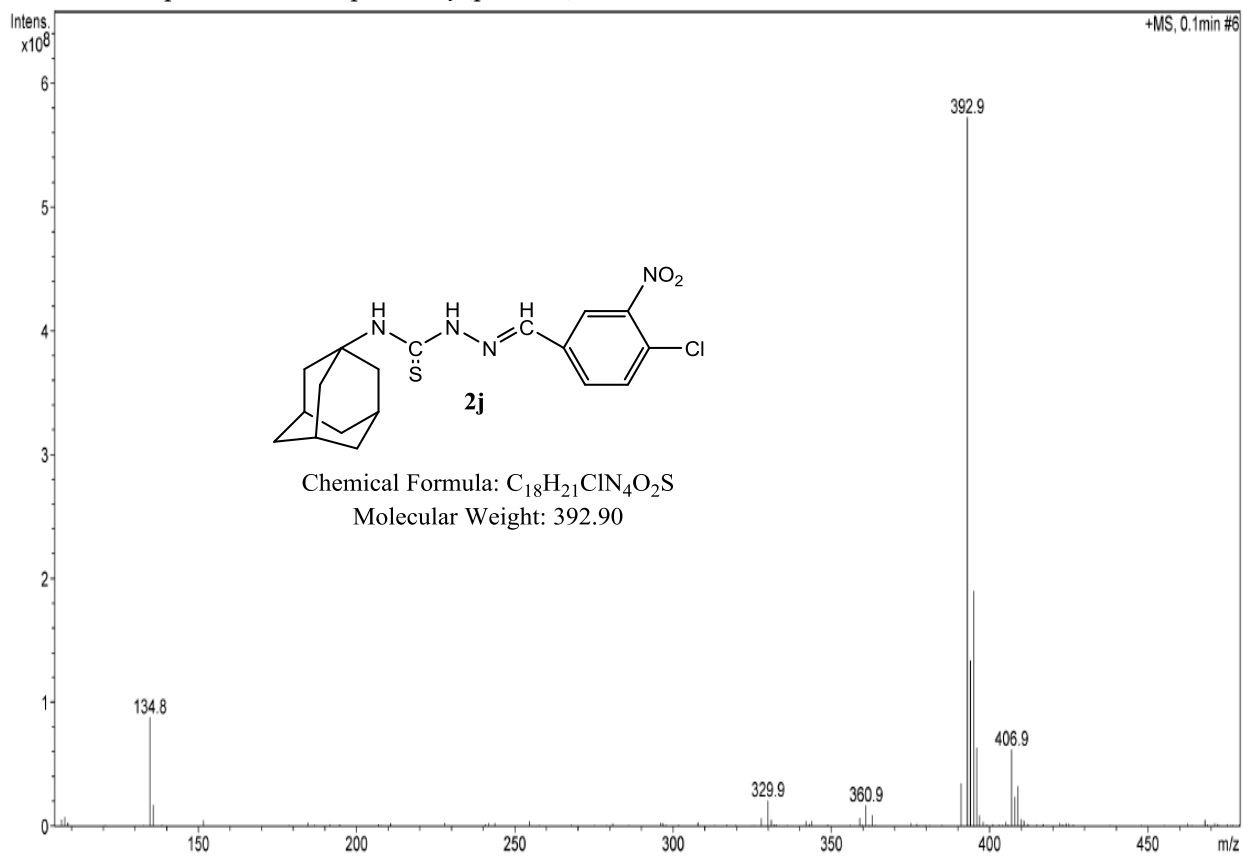

<sup>1</sup>H-NMR spectrum of compound **2k**

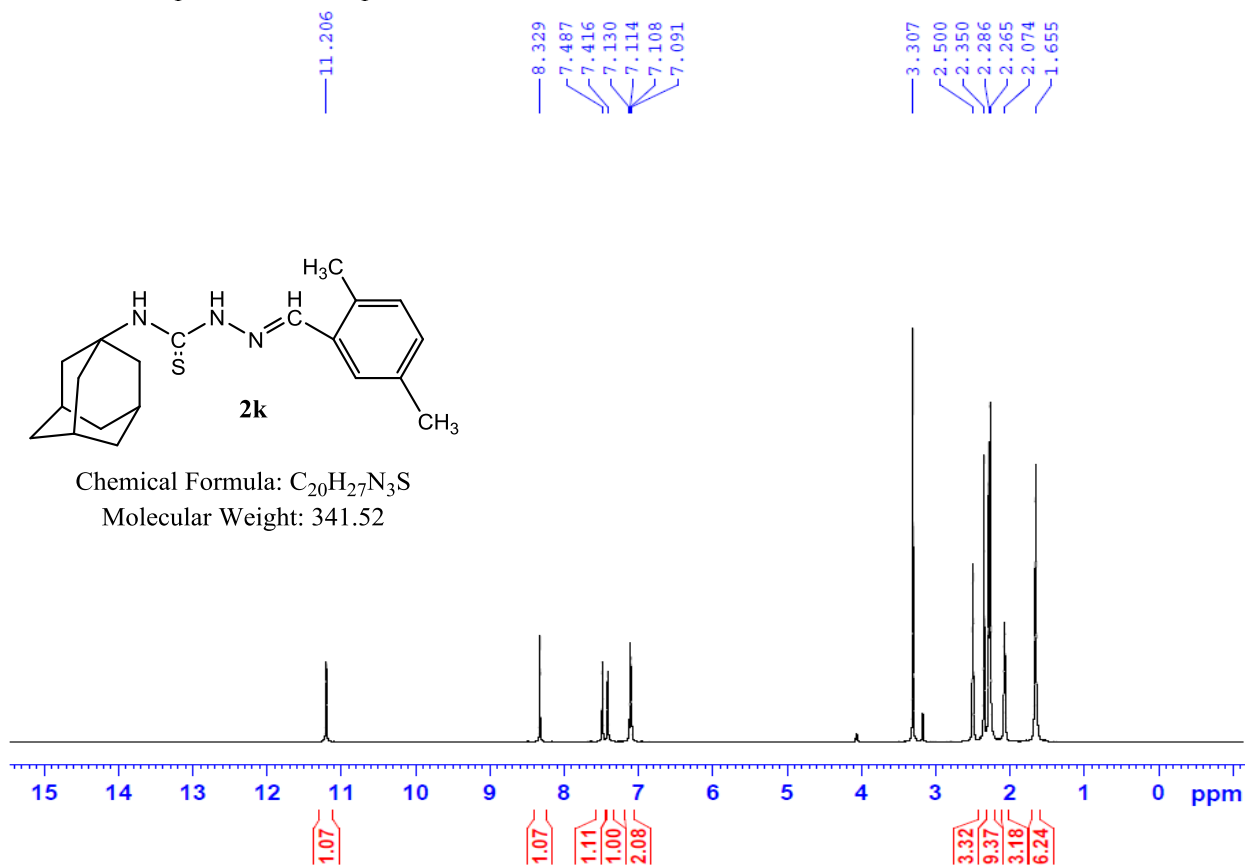

<sup>13</sup>C-NMR spectrum of compound **2k**

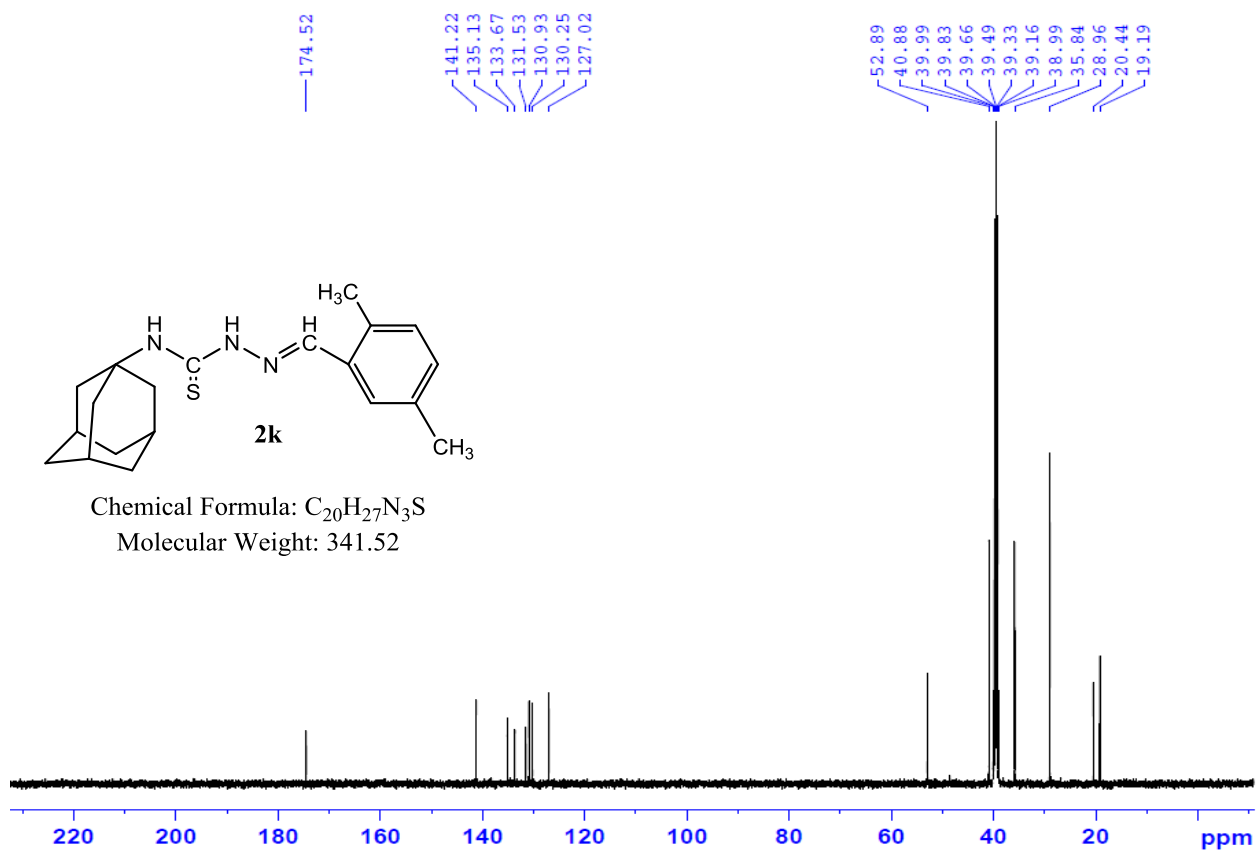

ESI-MS spectrum of compound **2k** (negative)

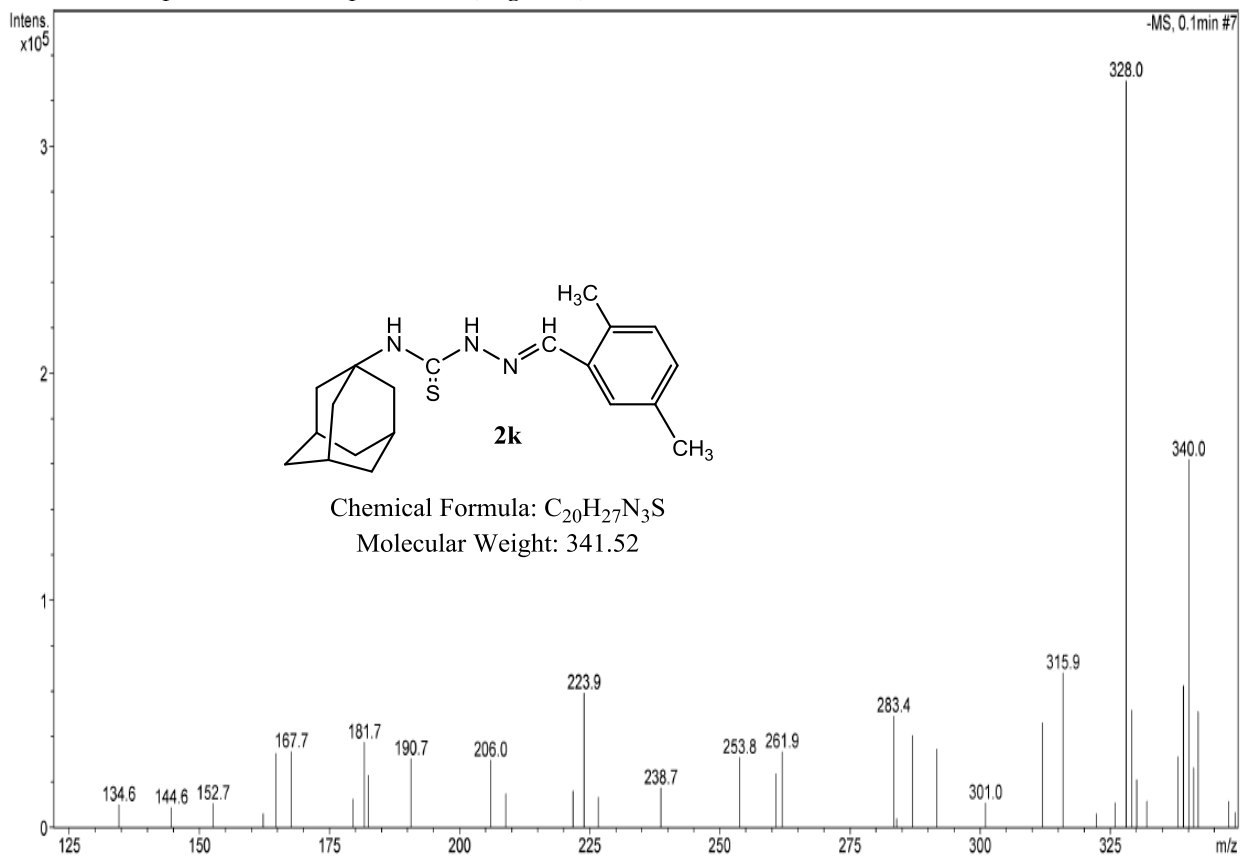

ESI-MS spectrum of compound **2k** (positive)

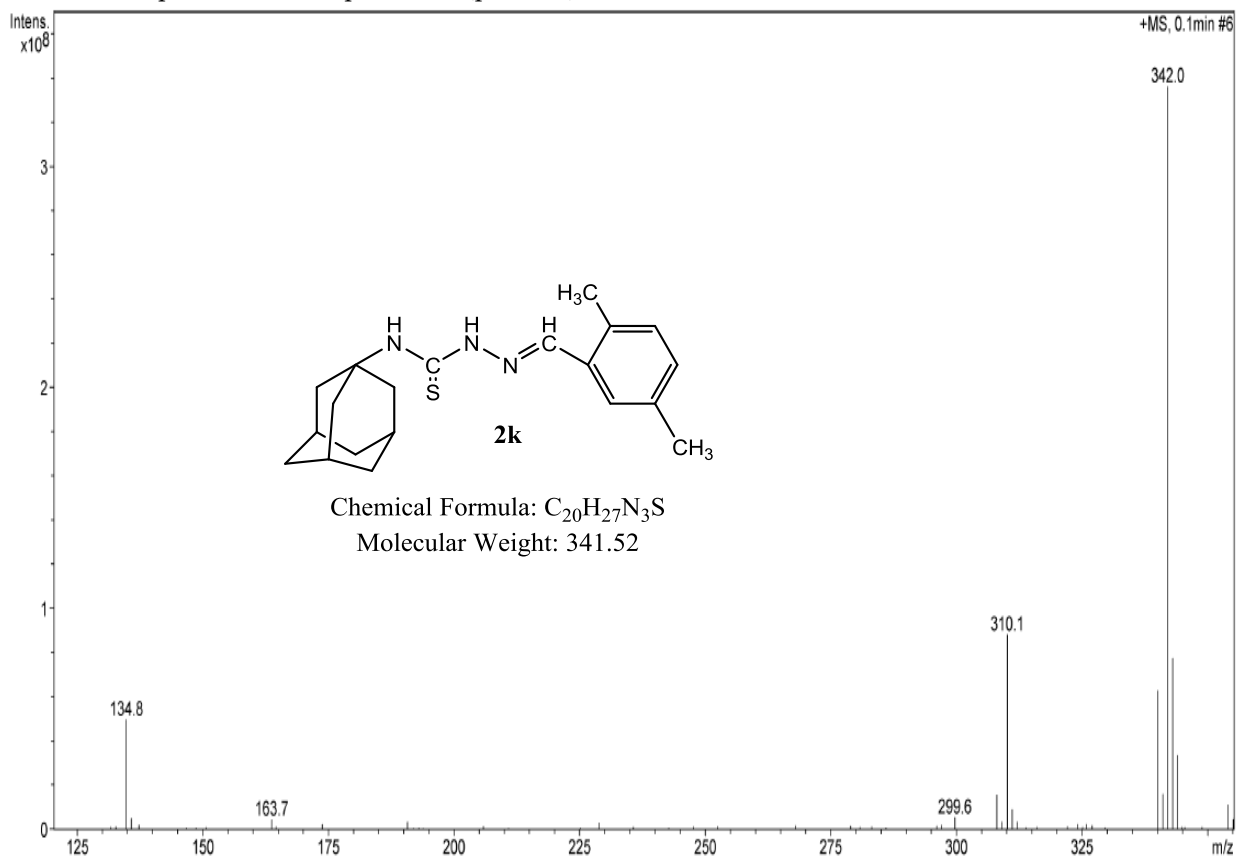

<sup>1</sup>H-NMR spectrum of compound 3a

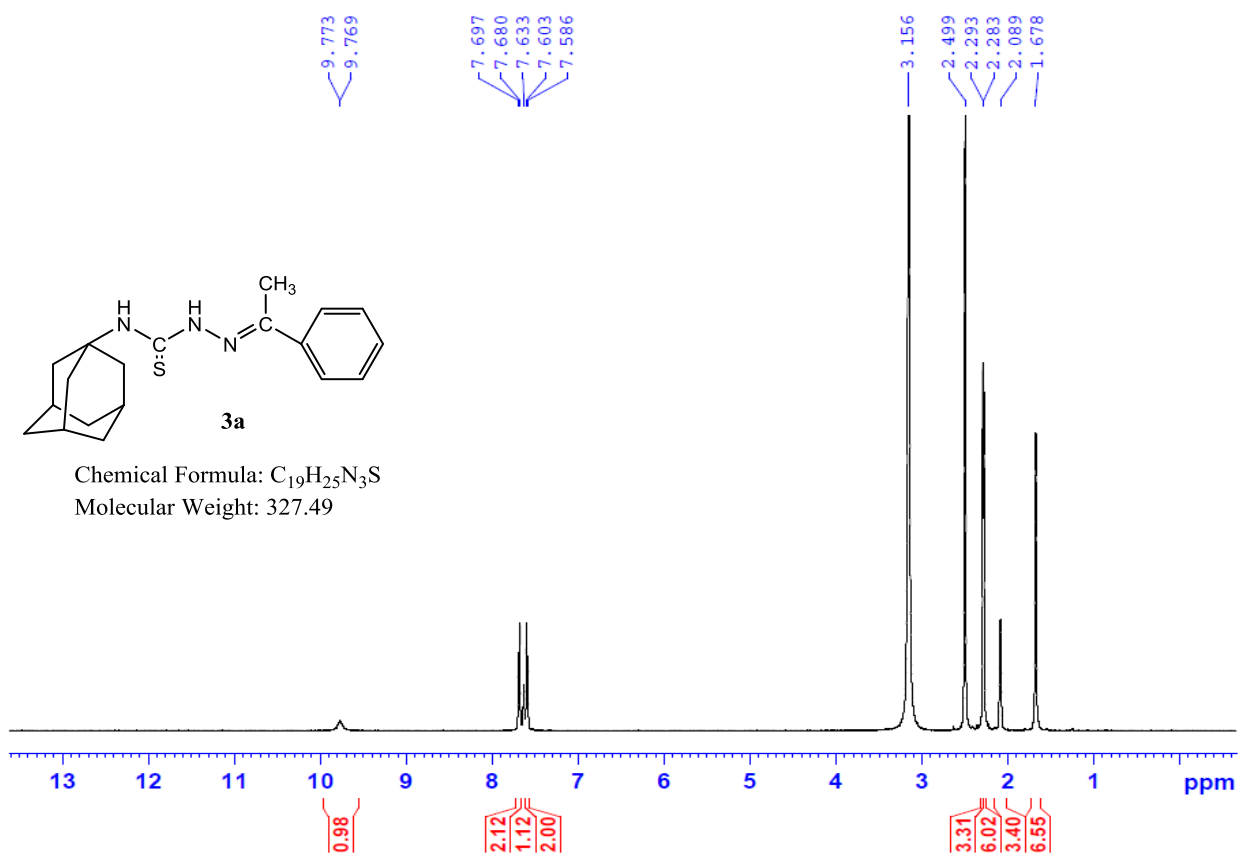

<sup>13</sup>C-NMR spectrum of compound 3a

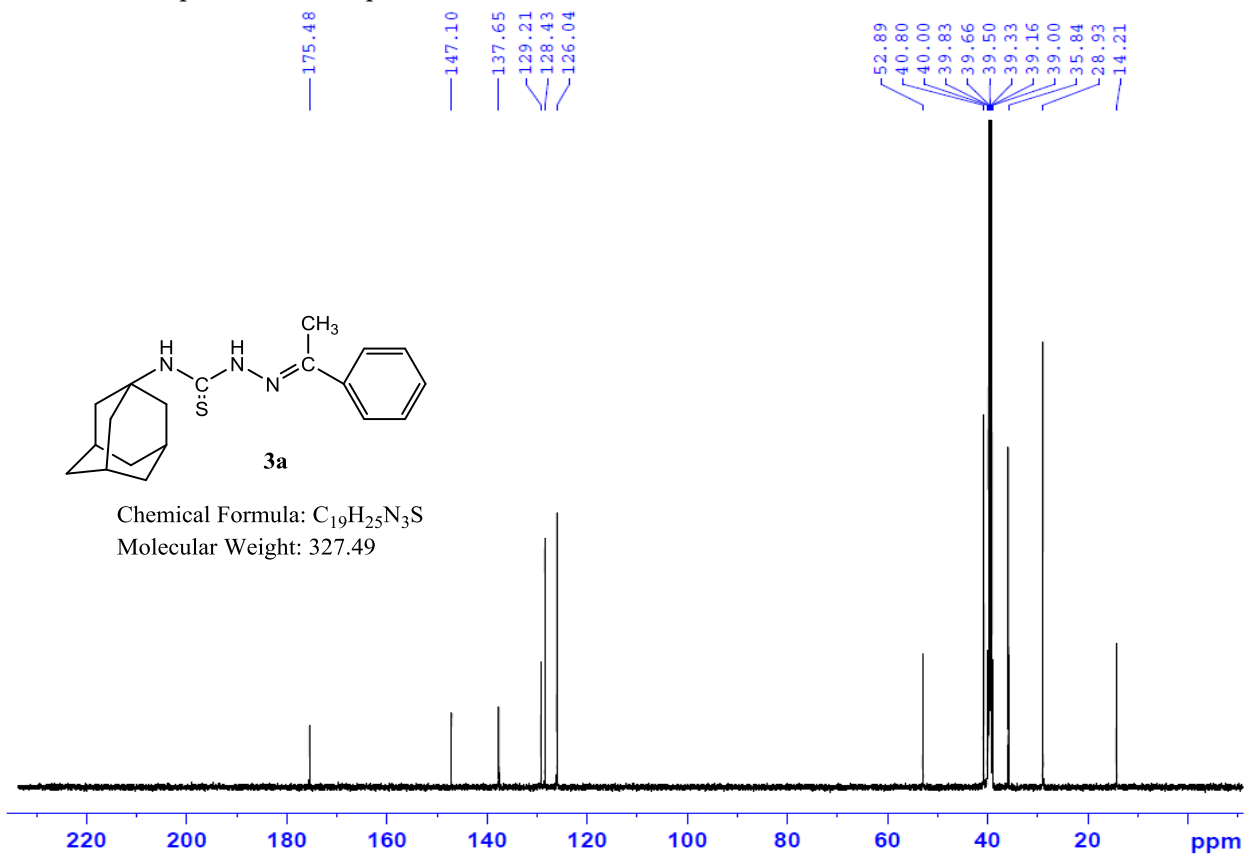



ESI-MS spectrum of compound **3a** (negative)

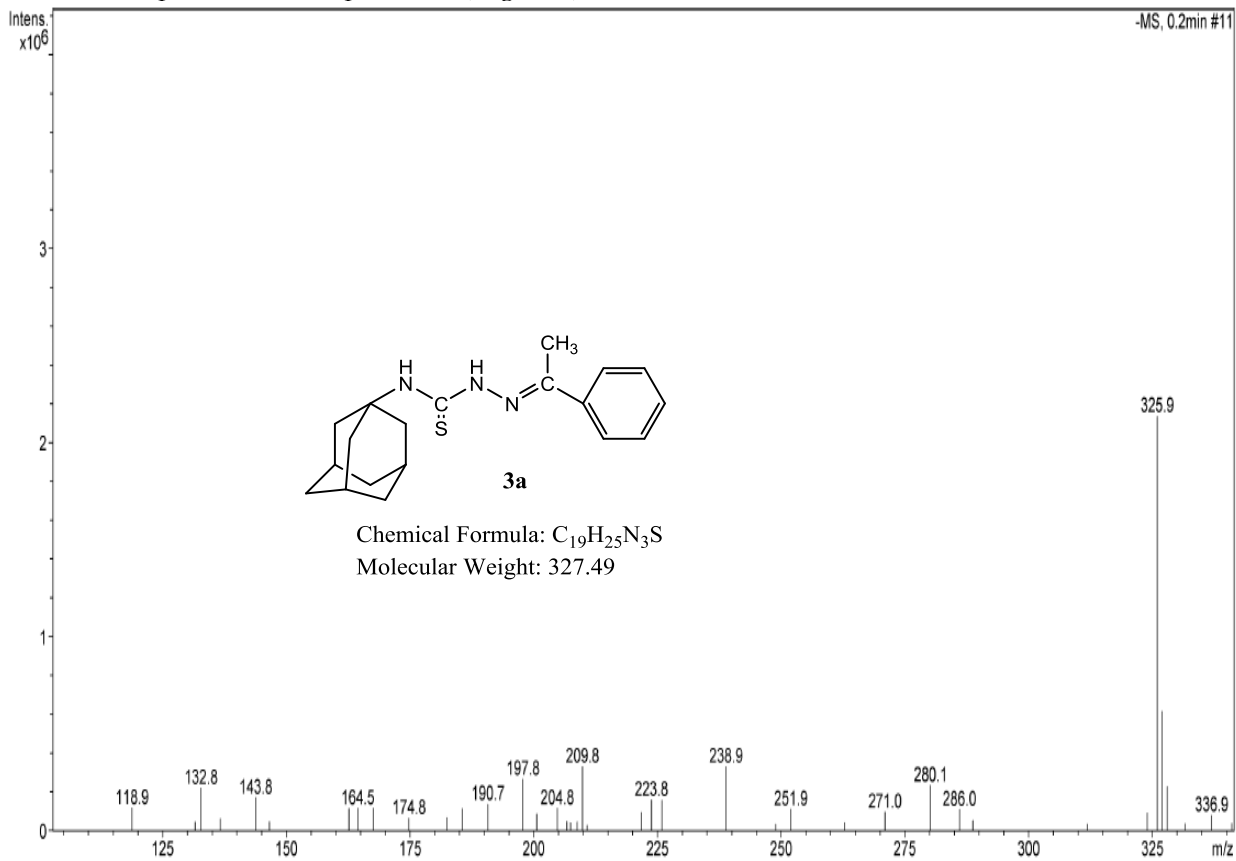

ESI-MS spectrum of compound **3a** (positive)

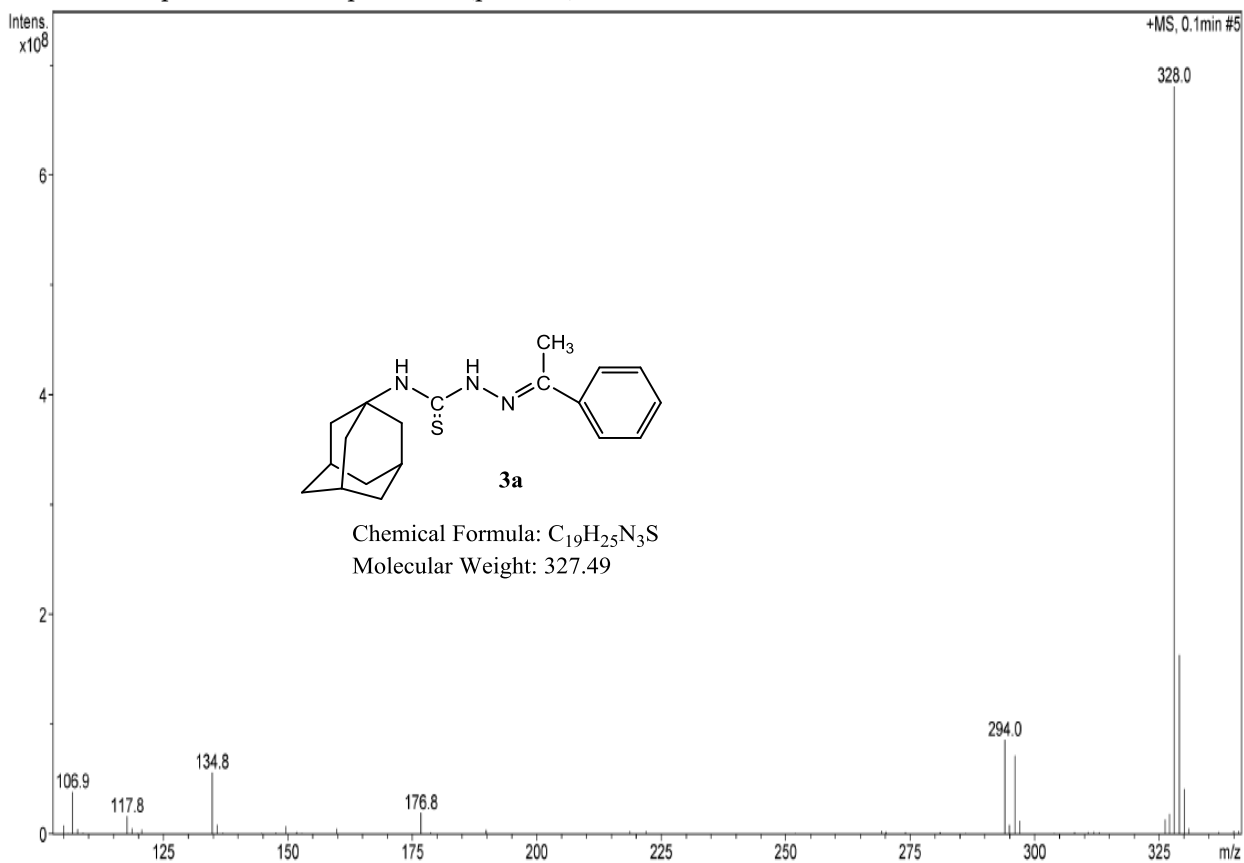

<sup>1</sup>H-NMR spectrum of compound **3b**

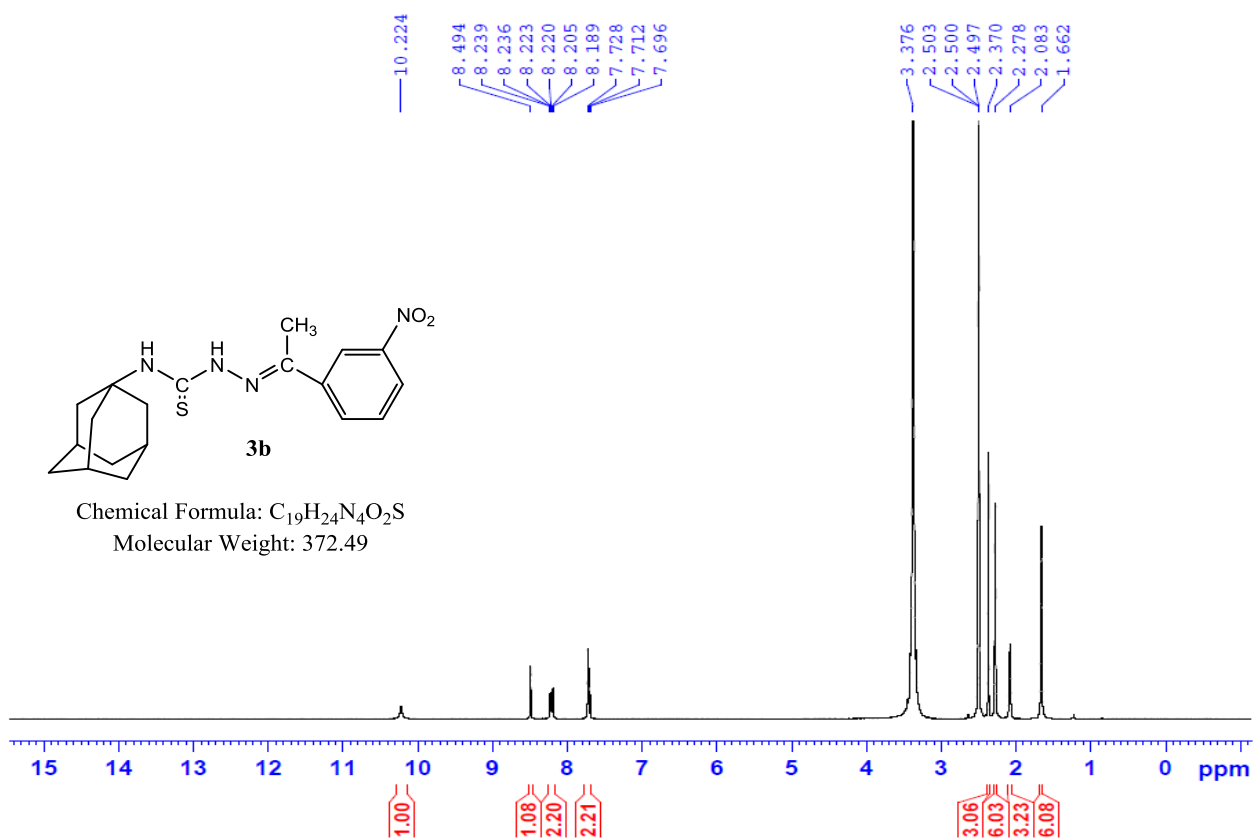

<sup>13</sup>C-NMR spectrum of compound **3b**

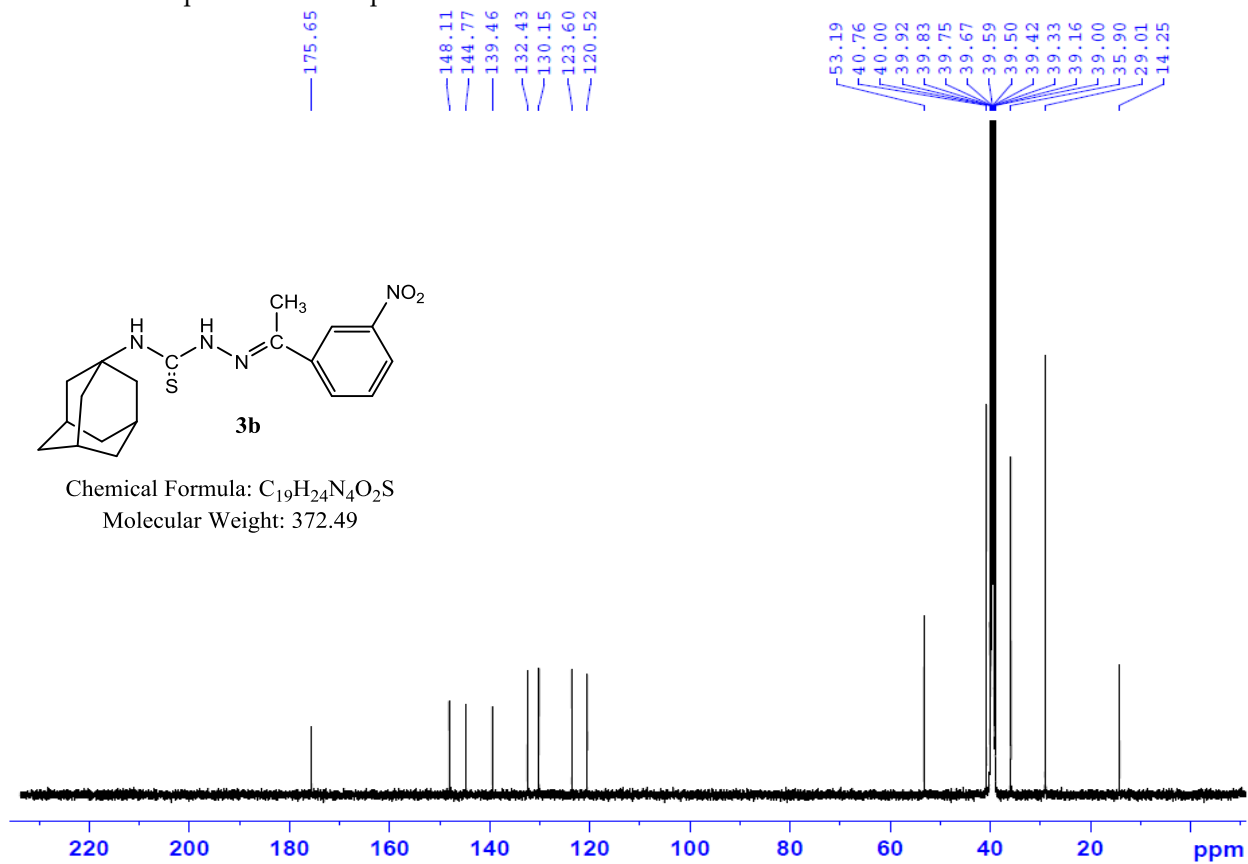

ESI-MS spectrum of compound **3b** (negative)

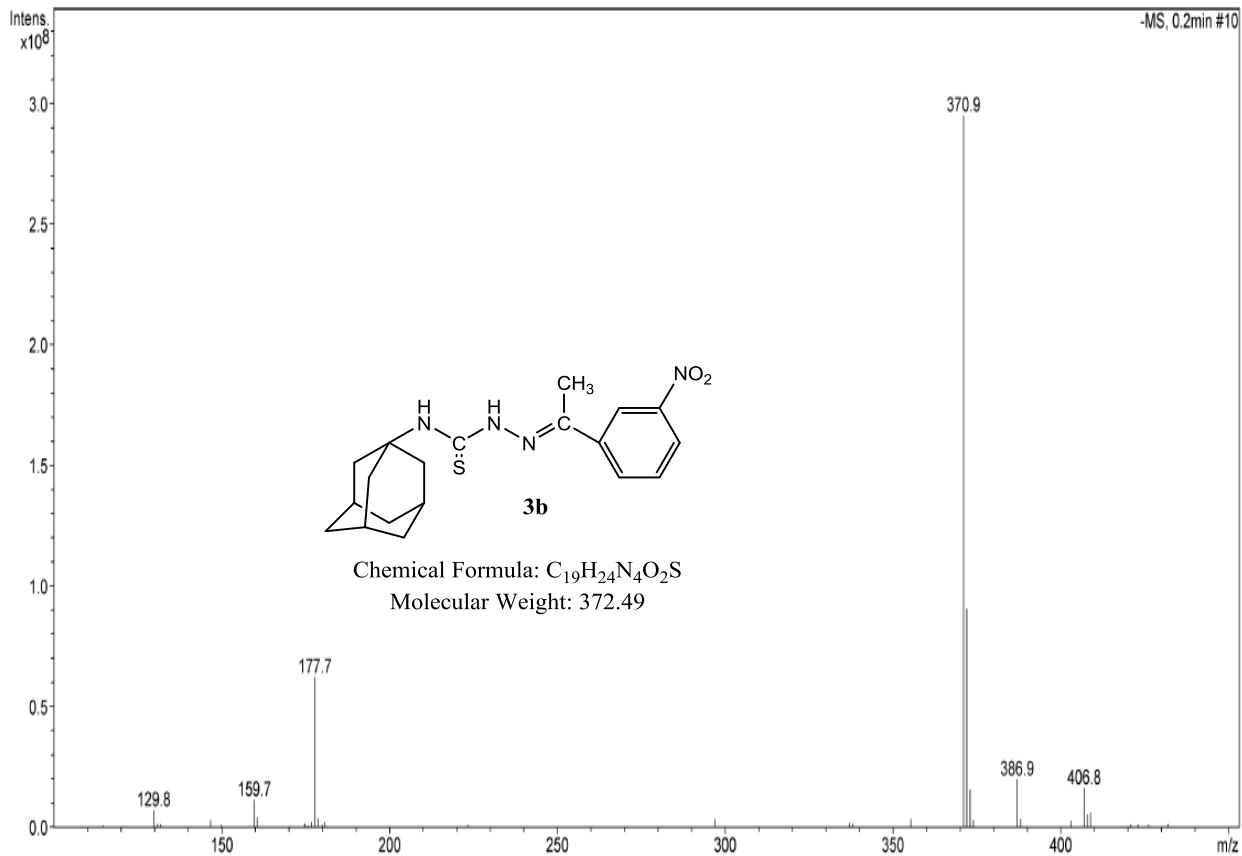

ESI-MS spectrum of compound **3b** (positive)

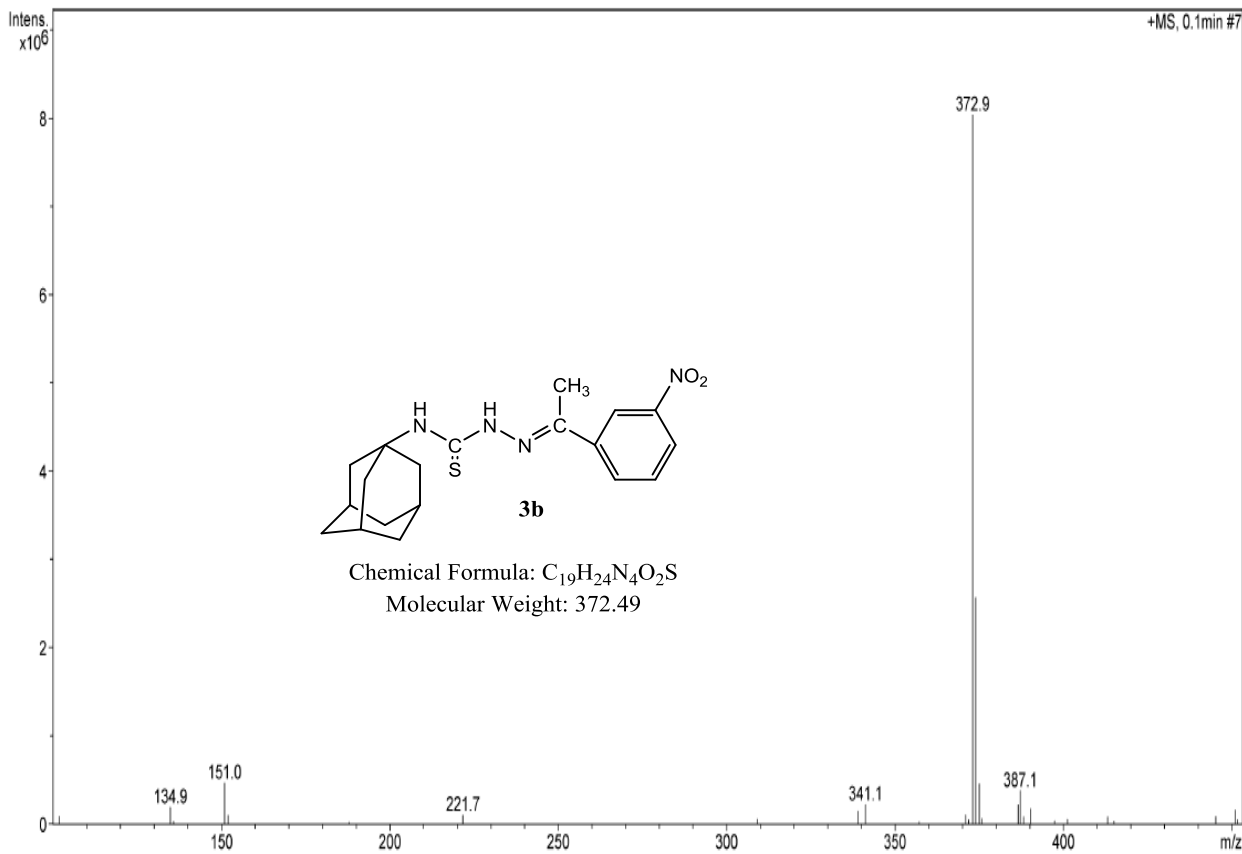

<sup>1</sup>H-NMR spectrum of compound 3c

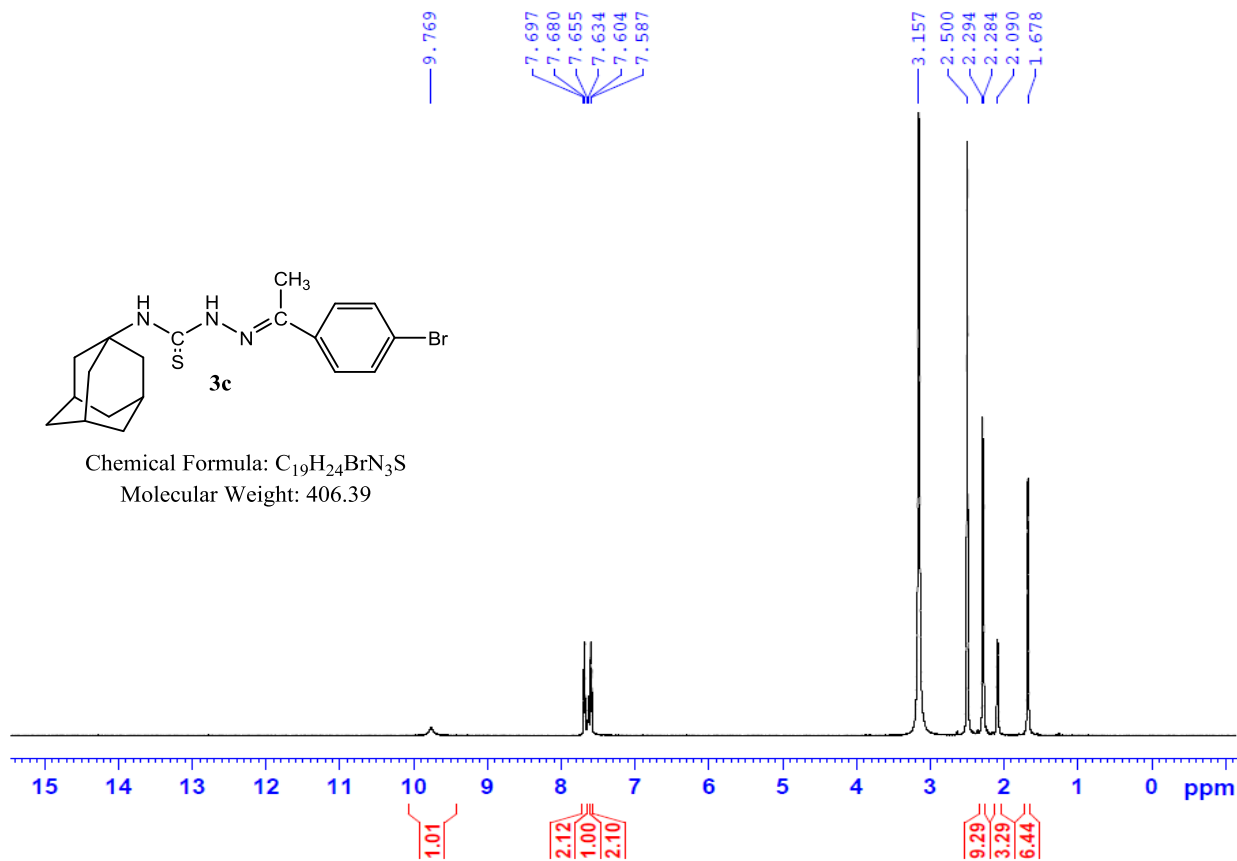

<sup>13</sup>C-NMR spectrum of compound 3c

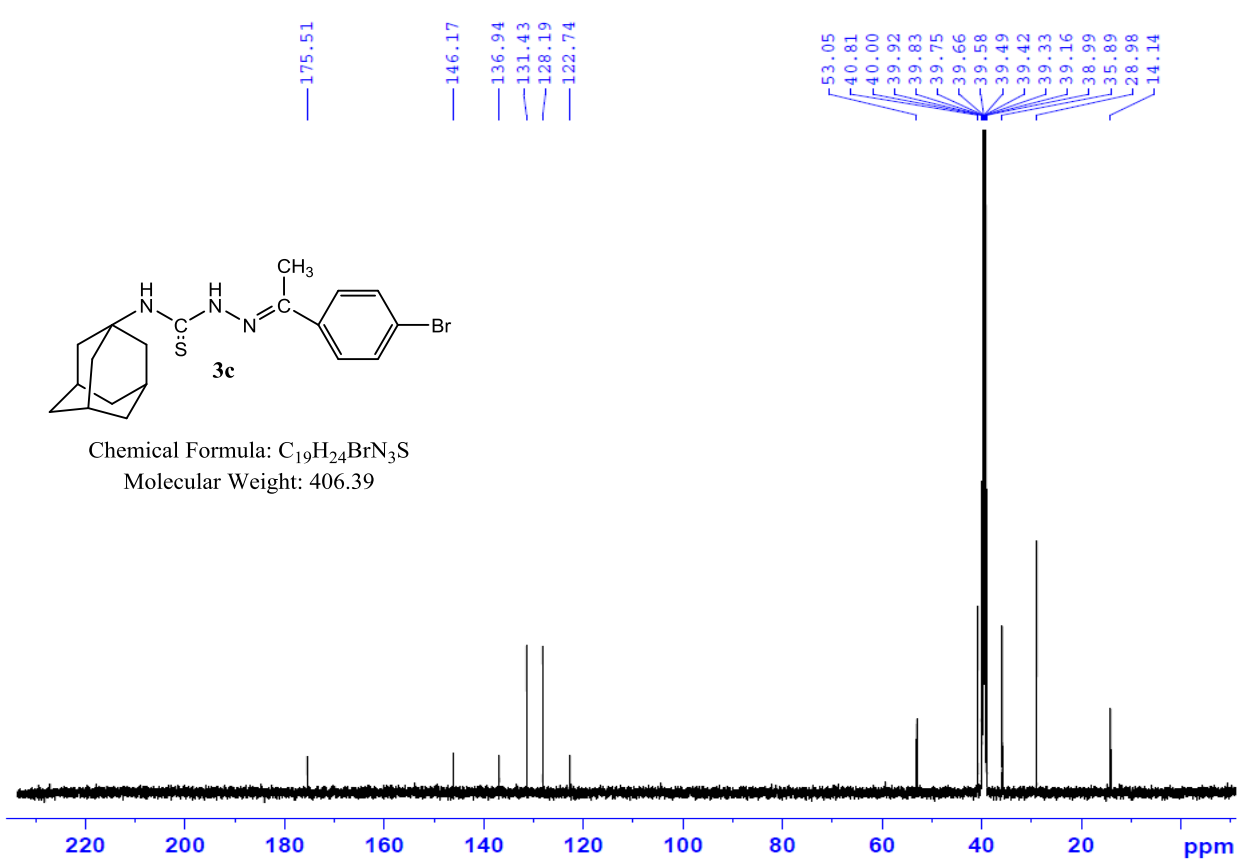

ESI-MS spectrum of compound **3c** (negative)

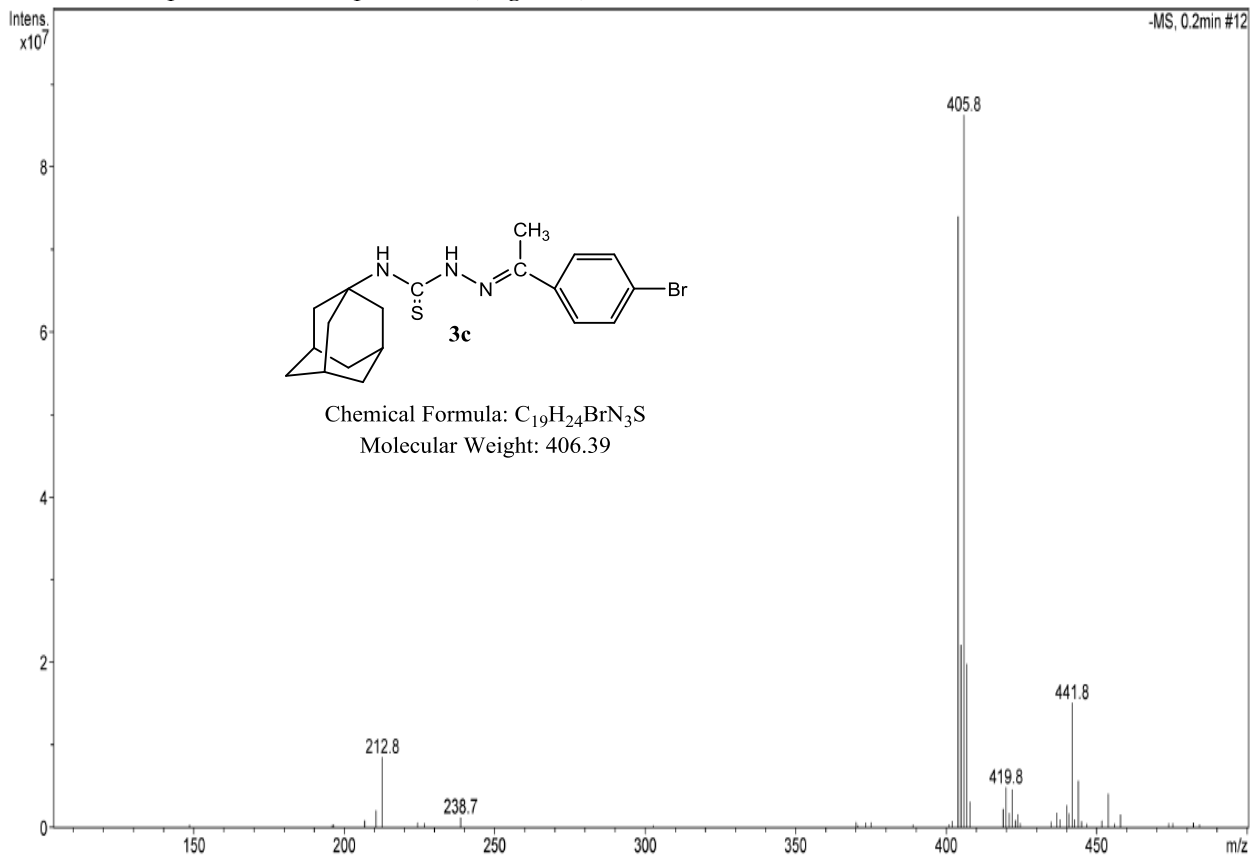

ESI-MS spectrum of compound **3c** (positive)

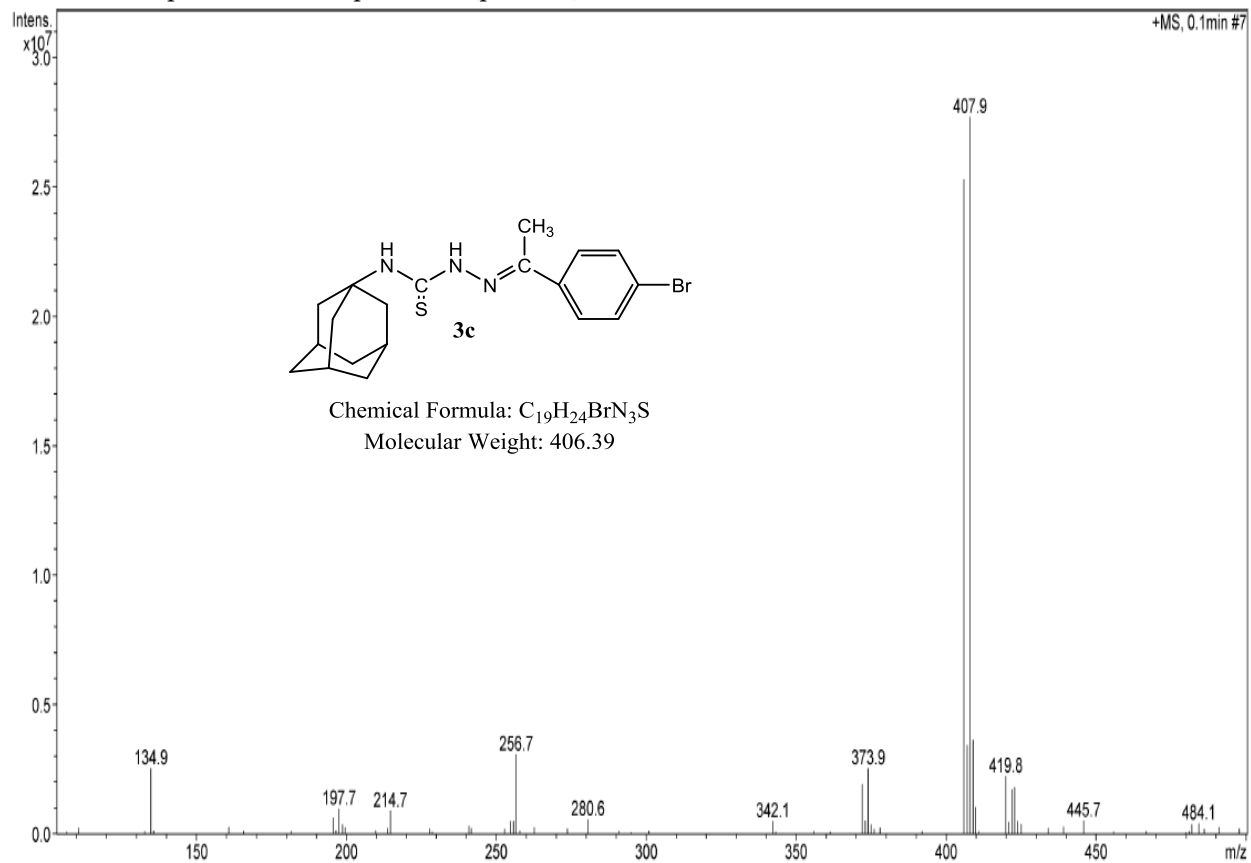

<sup>1</sup>H-NMR spectrum of compound **3d**

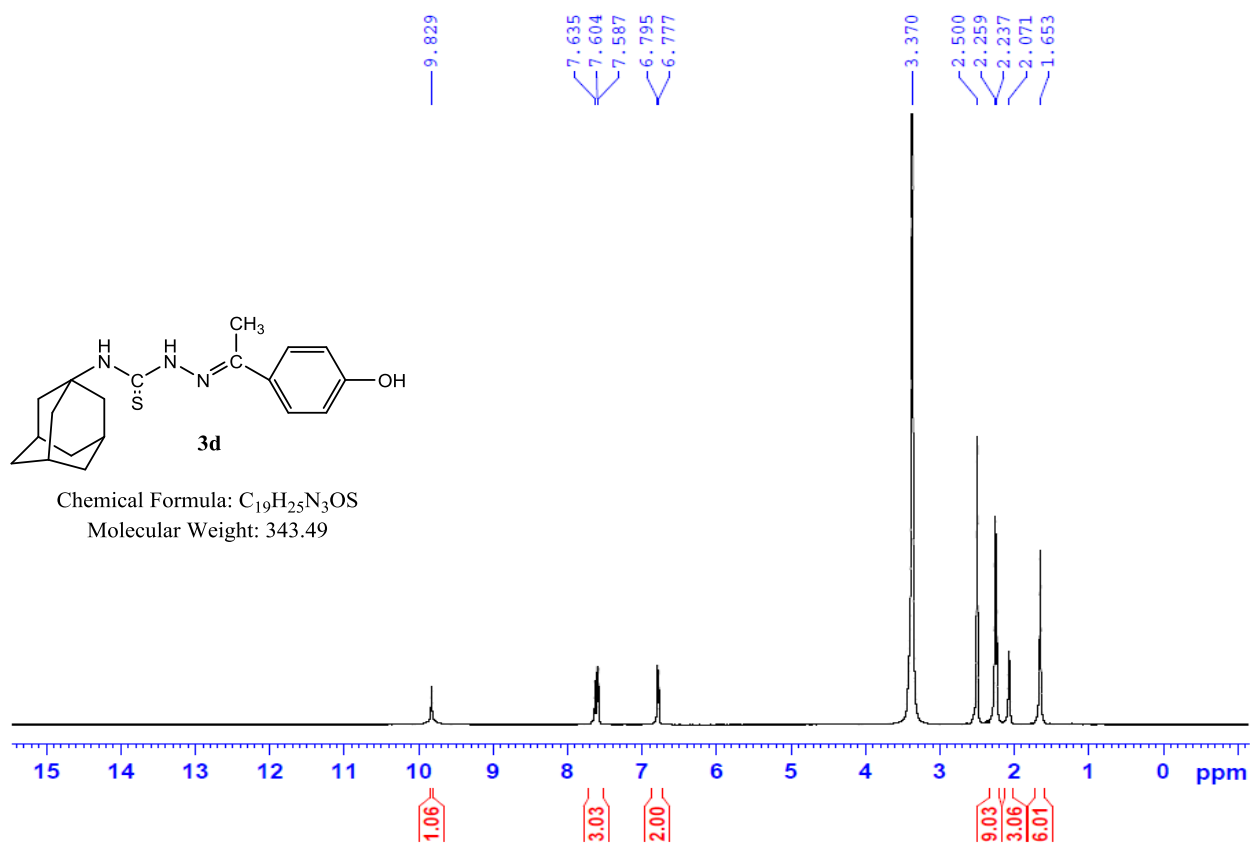

<sup>13</sup>C-NMR spectrum of compound **3d**

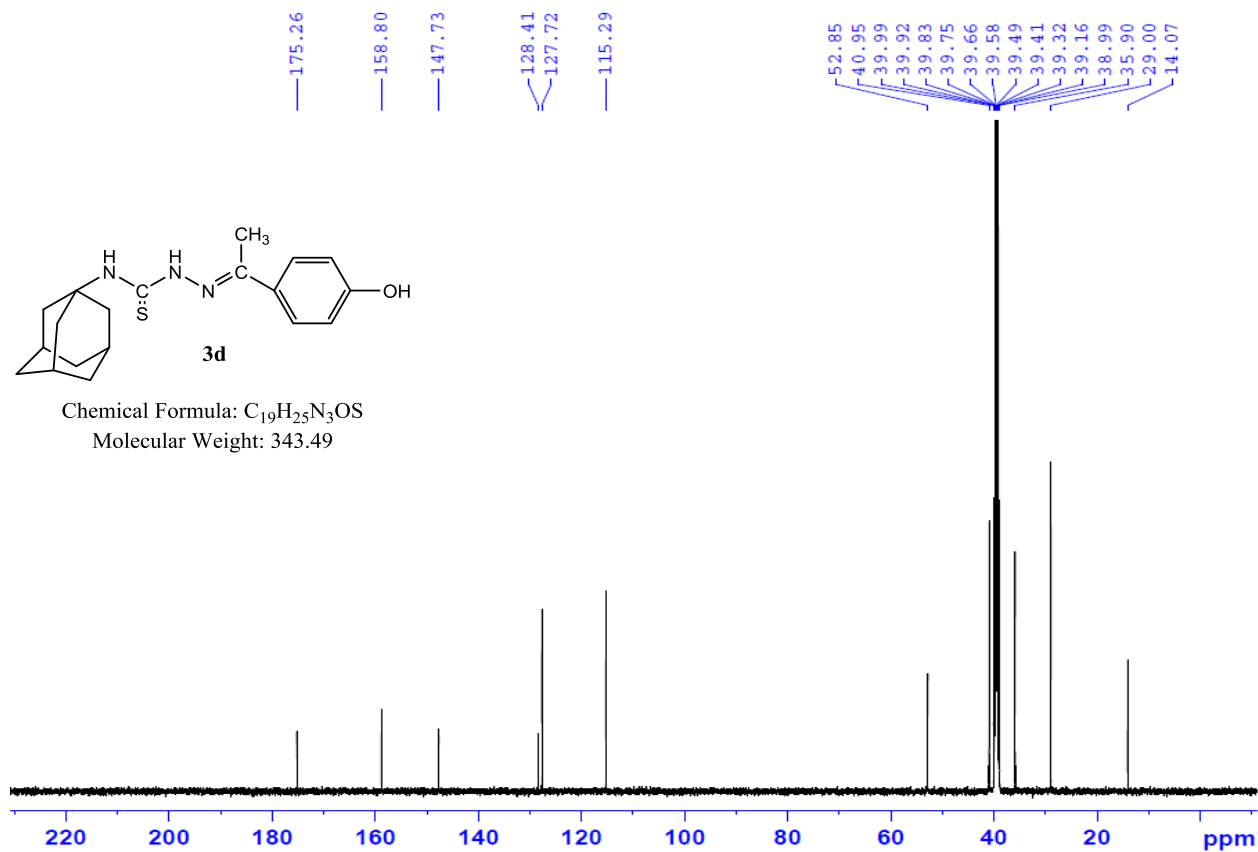

ESI-MS spectrum of compound **3d** (negative)

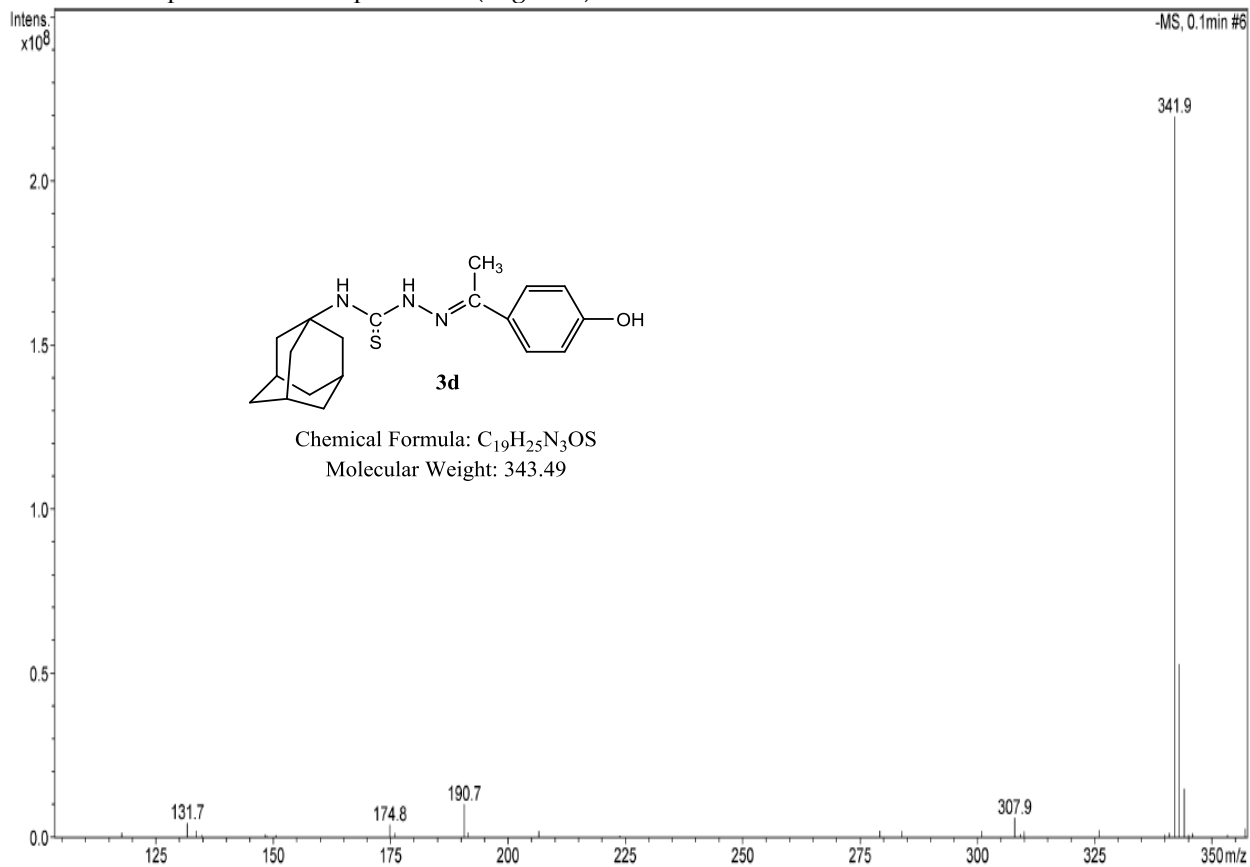

ESI-MS spectrum of compound **3d** (positive)

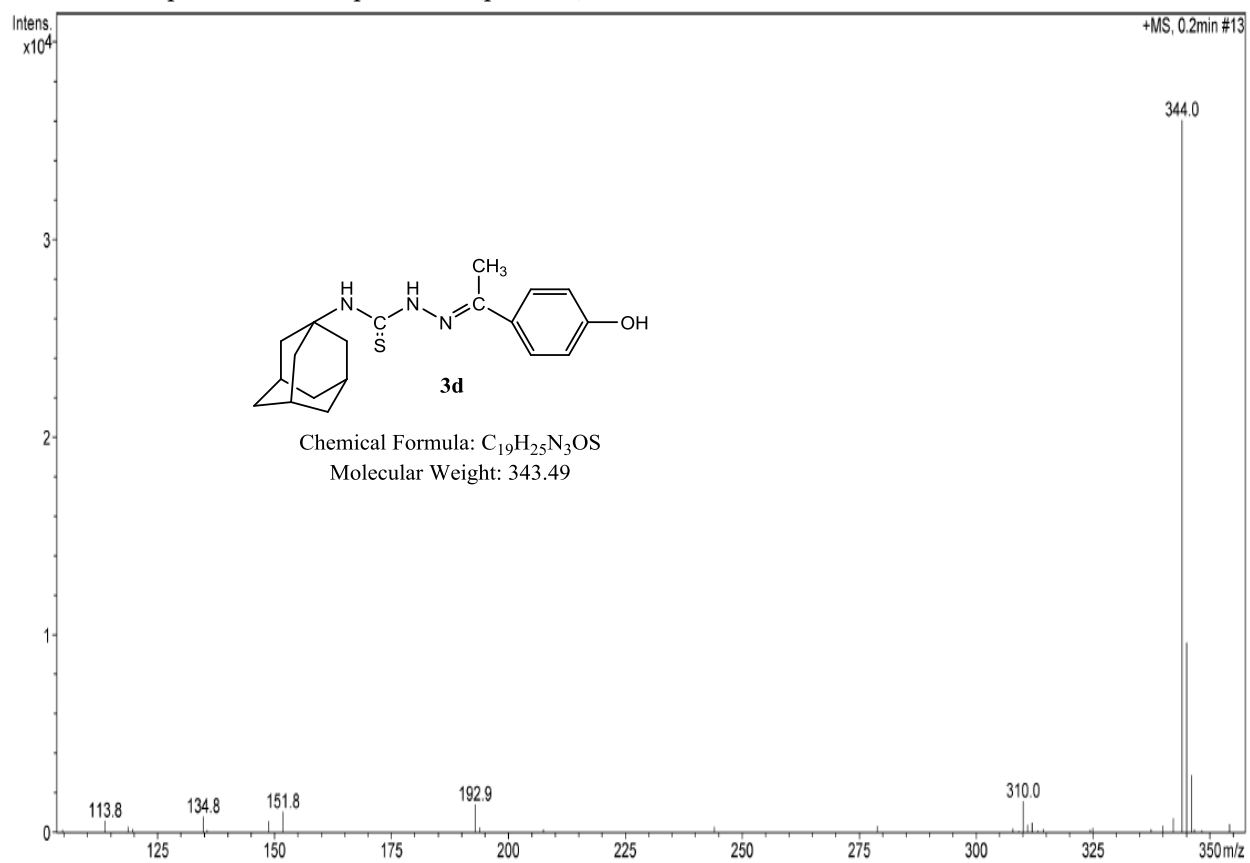

<sup>1</sup>H-NMR spectrum of compound 3e

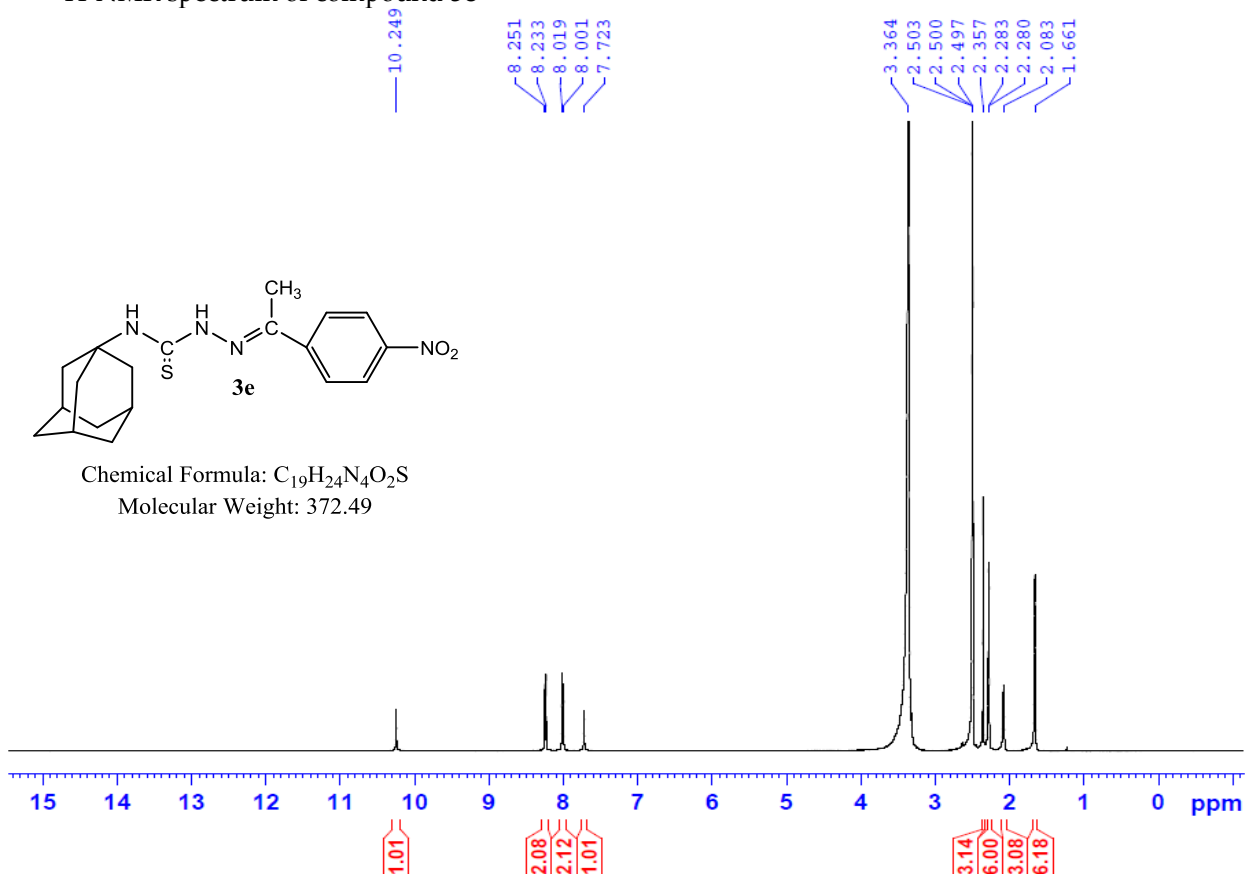

<sup>13</sup>C-NMR spectrum of compound 3e

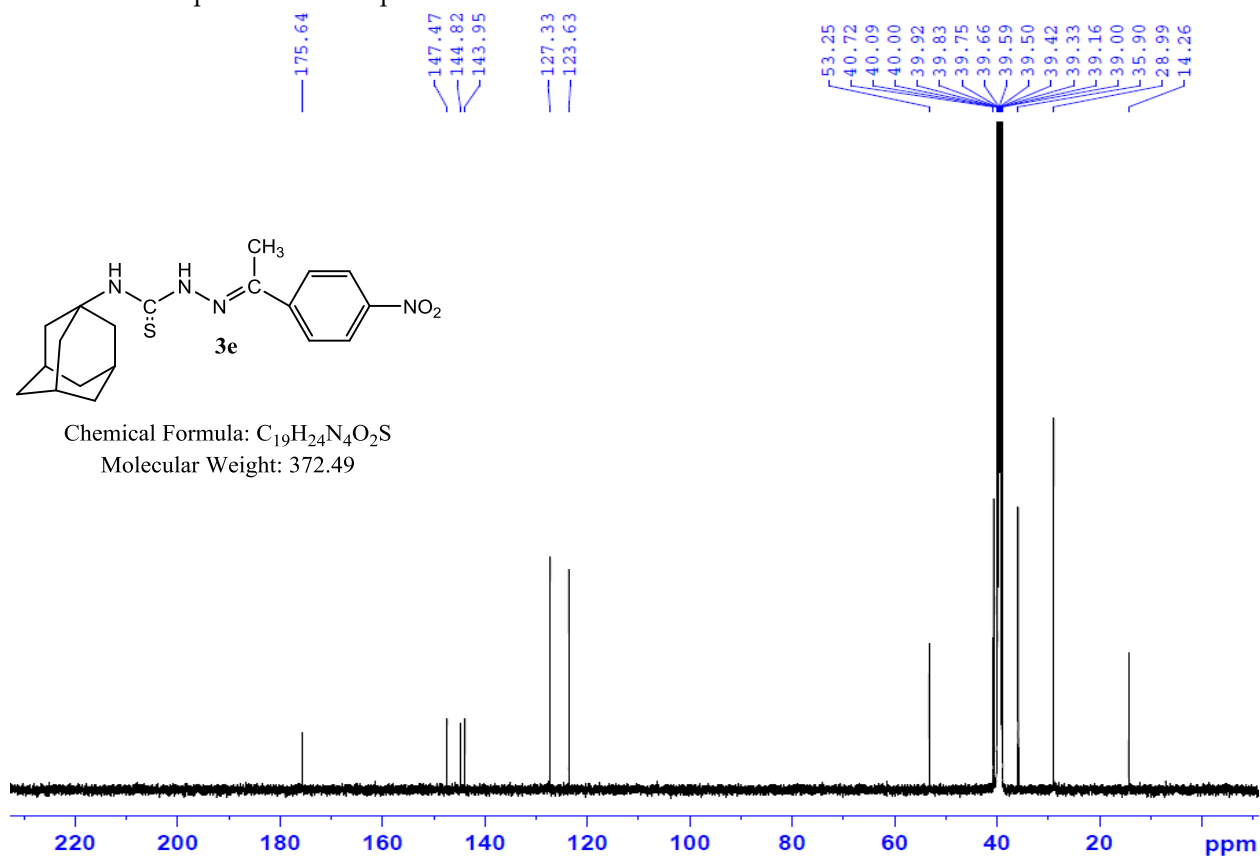



ESI-MS spectrum of compound **3e** (negative)

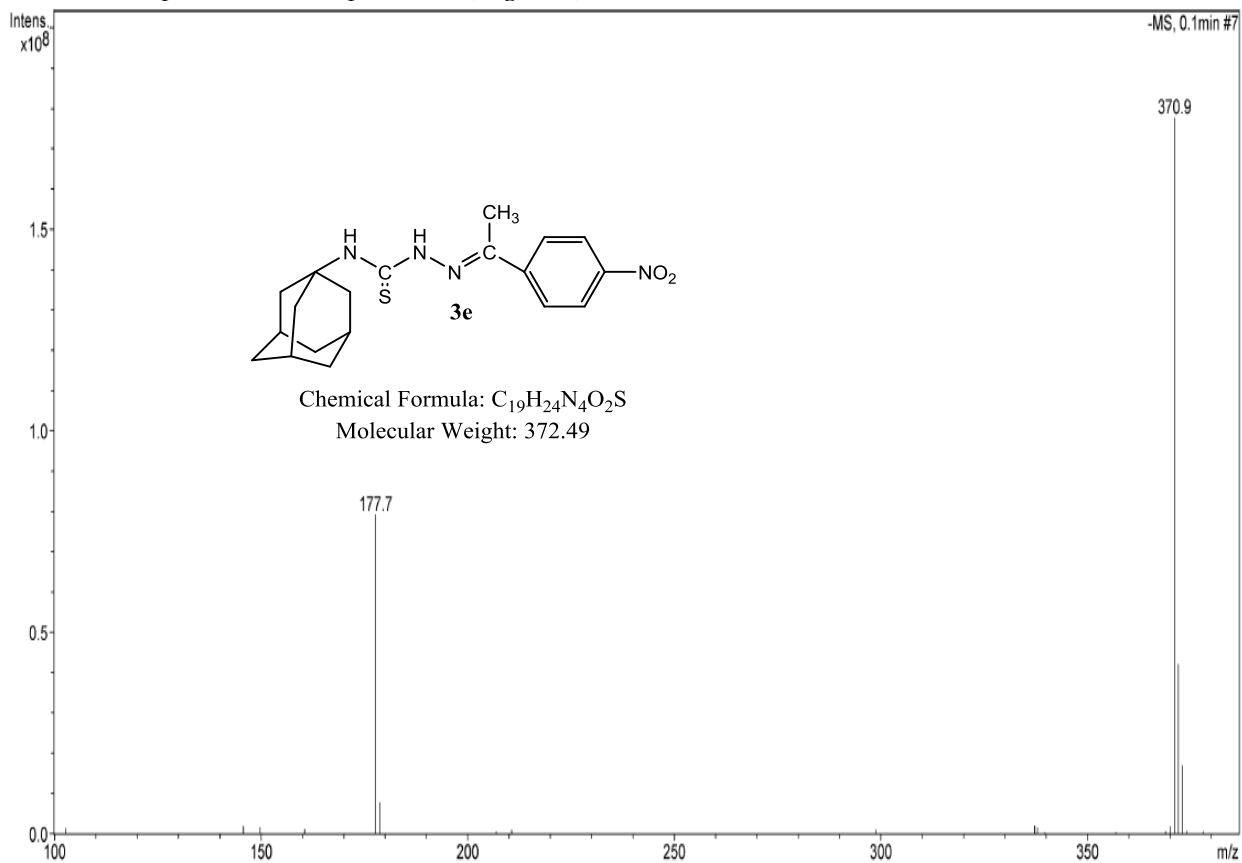

ESI-MS spectrum of compound **3e** (positive)

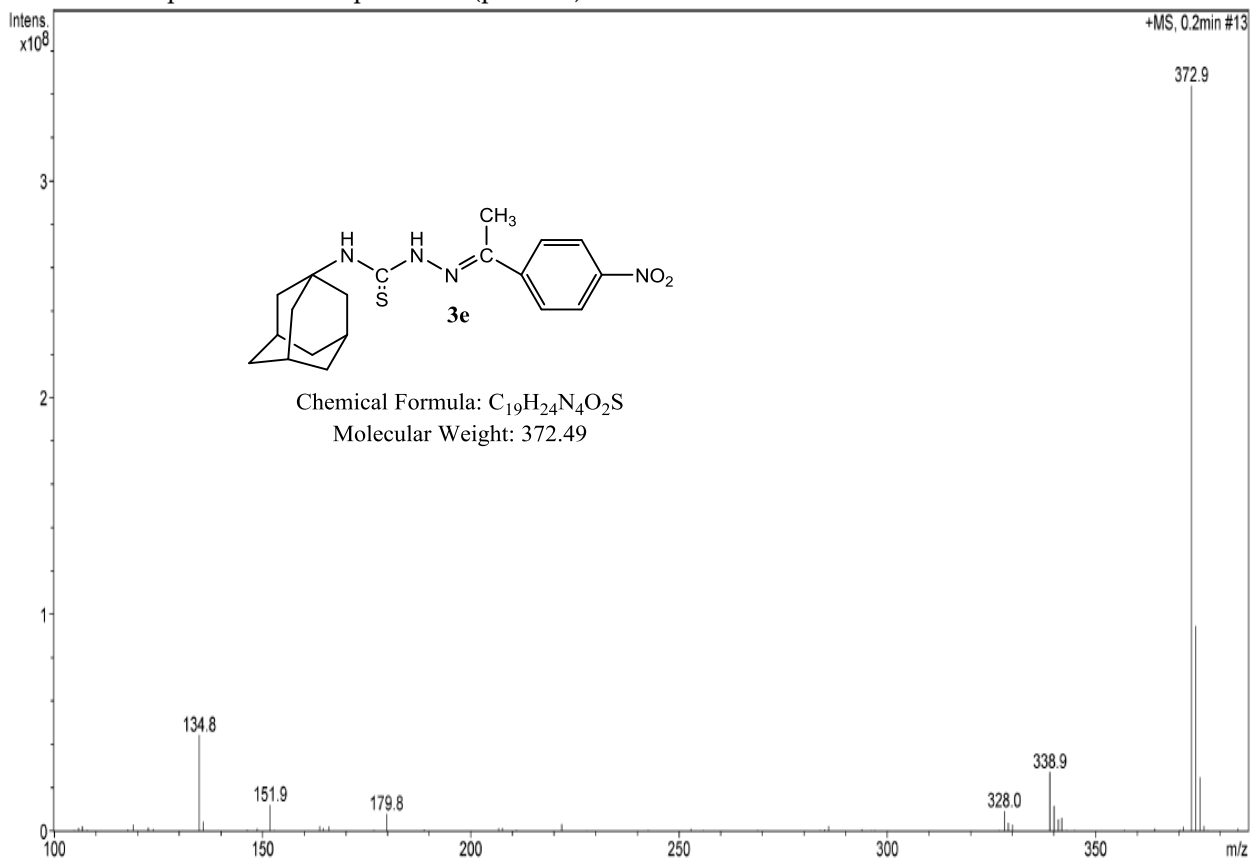

<sup>1</sup>H-NMR spectrum of compound 3f

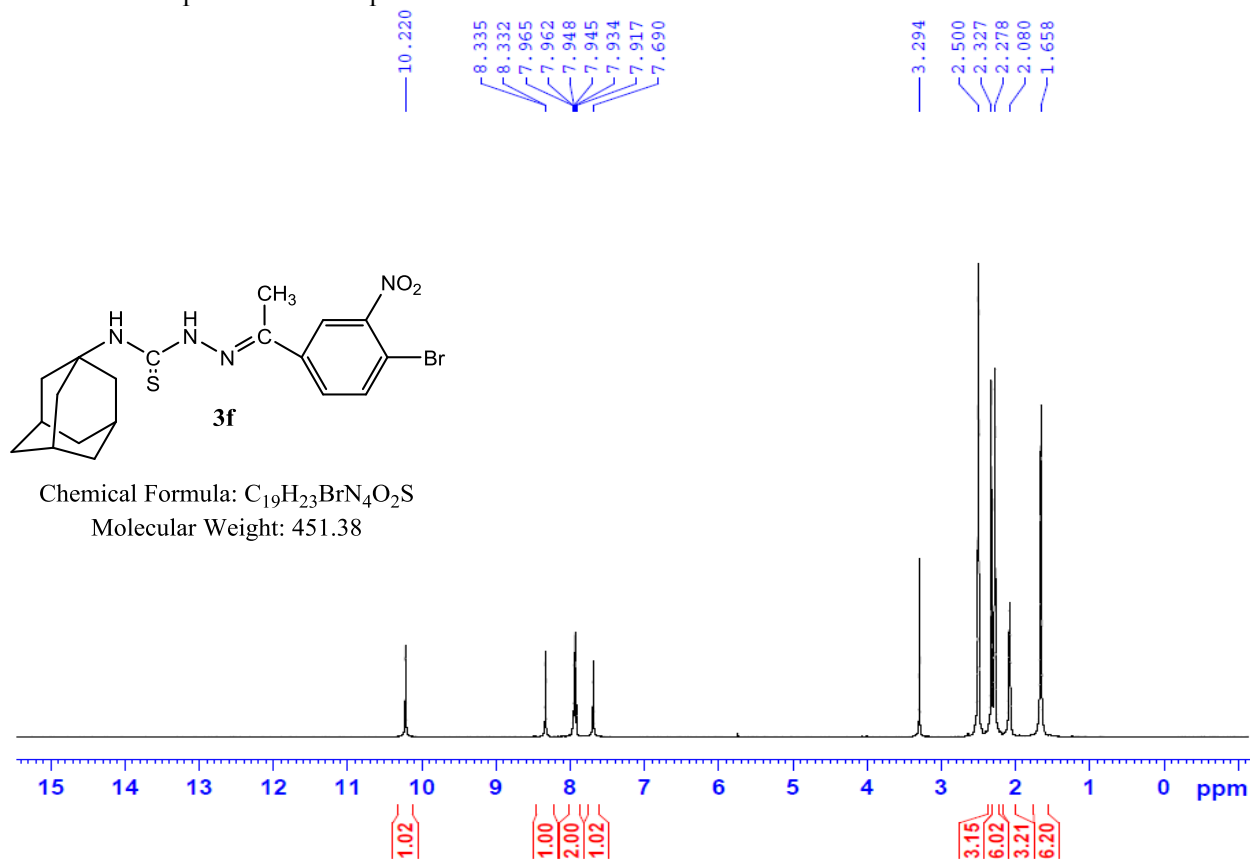

<sup>13</sup>C-NMR spectrum of compound 3f

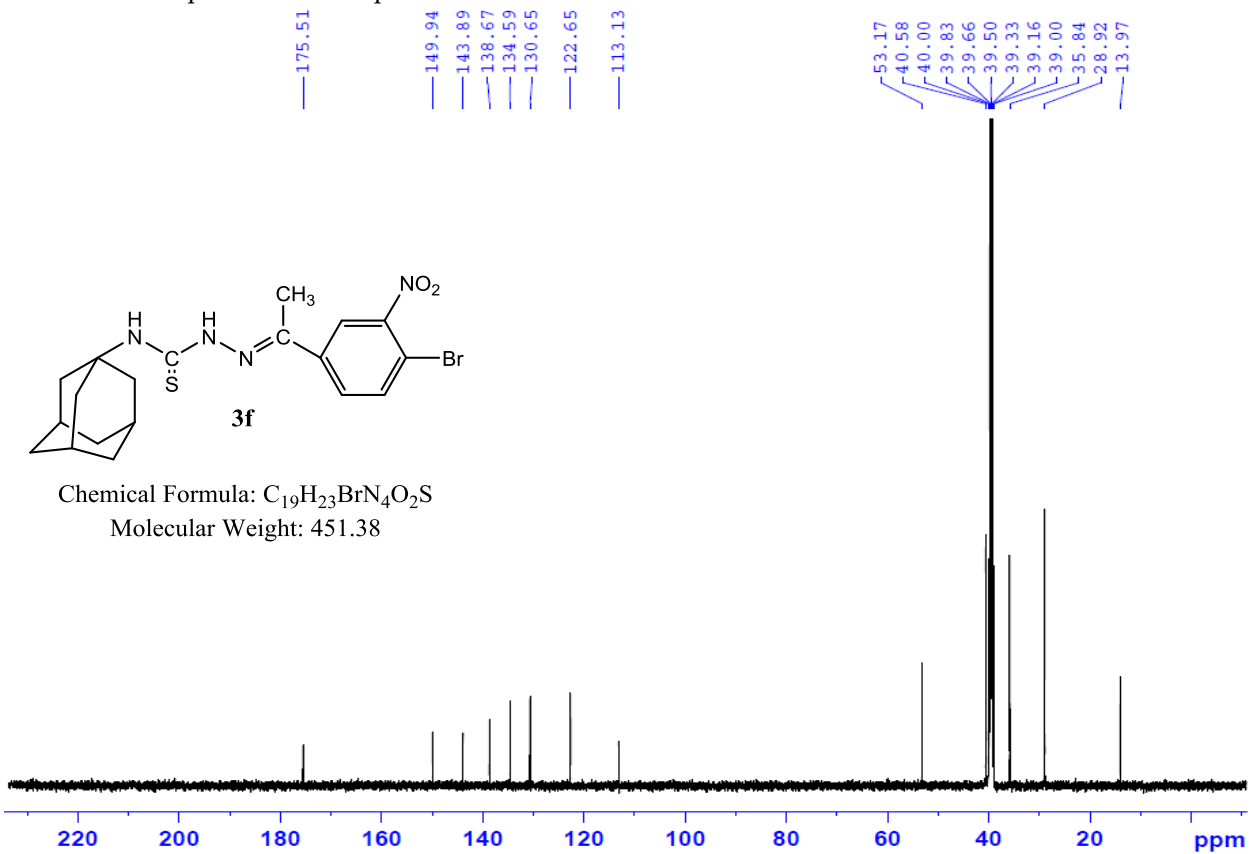

ESI-MS spectrum of compound **3f** (negative)

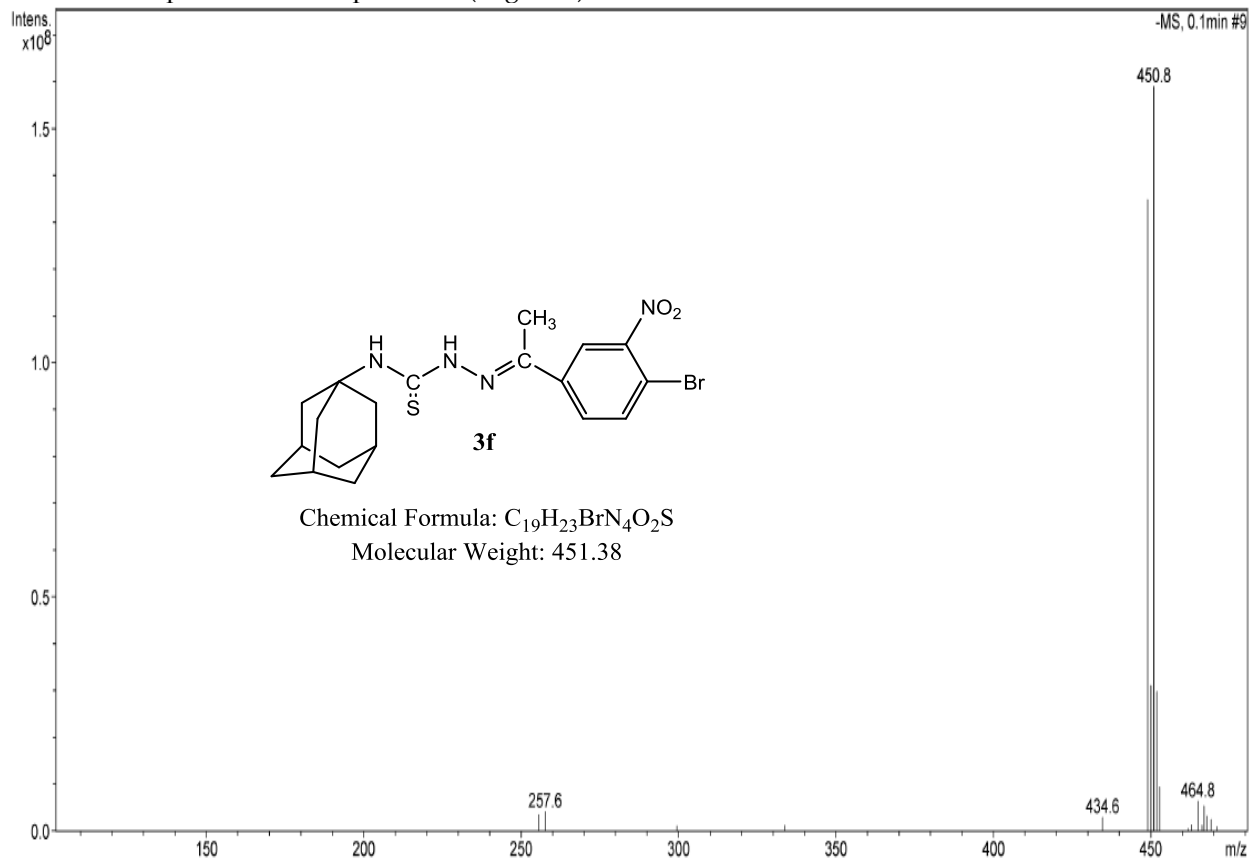

ESI-MS spectrum of compound **3f** (positive)

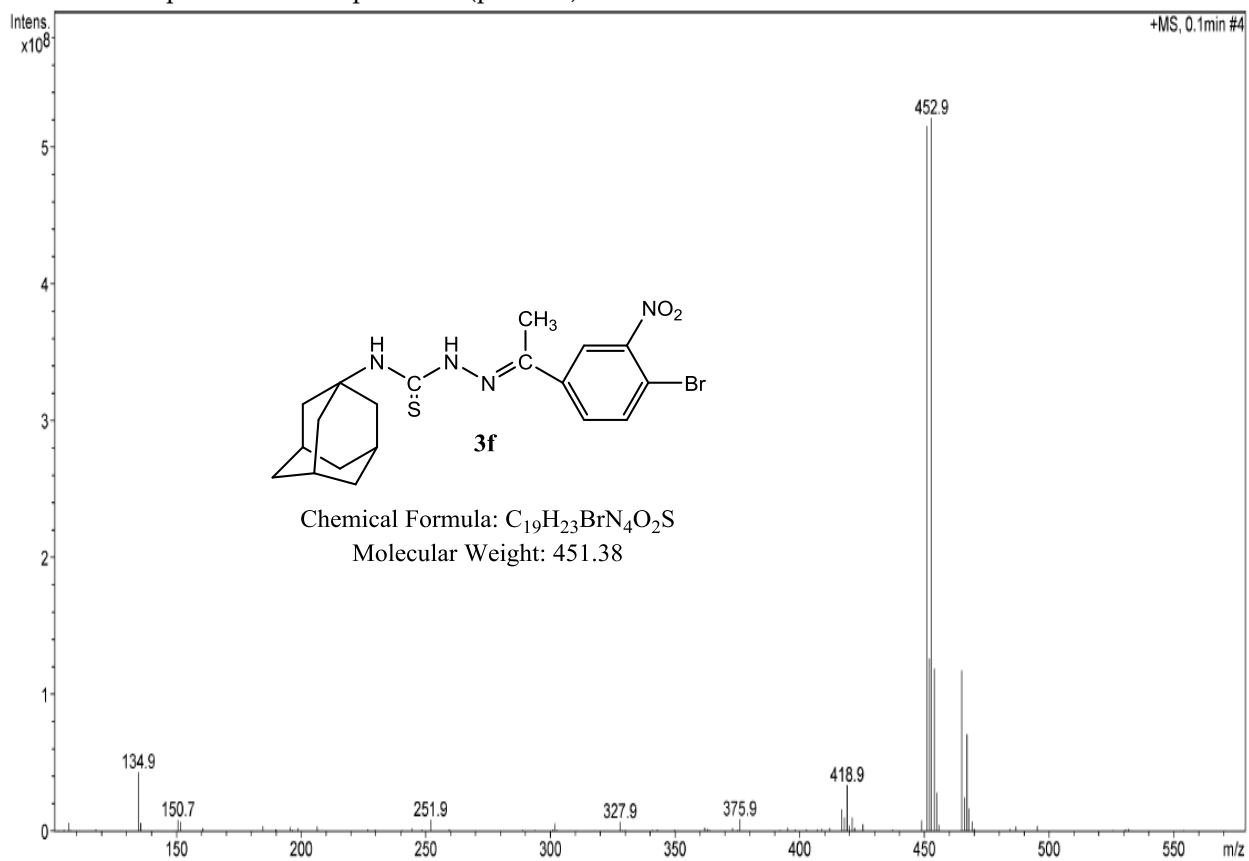

<sup>1</sup>H-NMR spectrum of compound **3g**

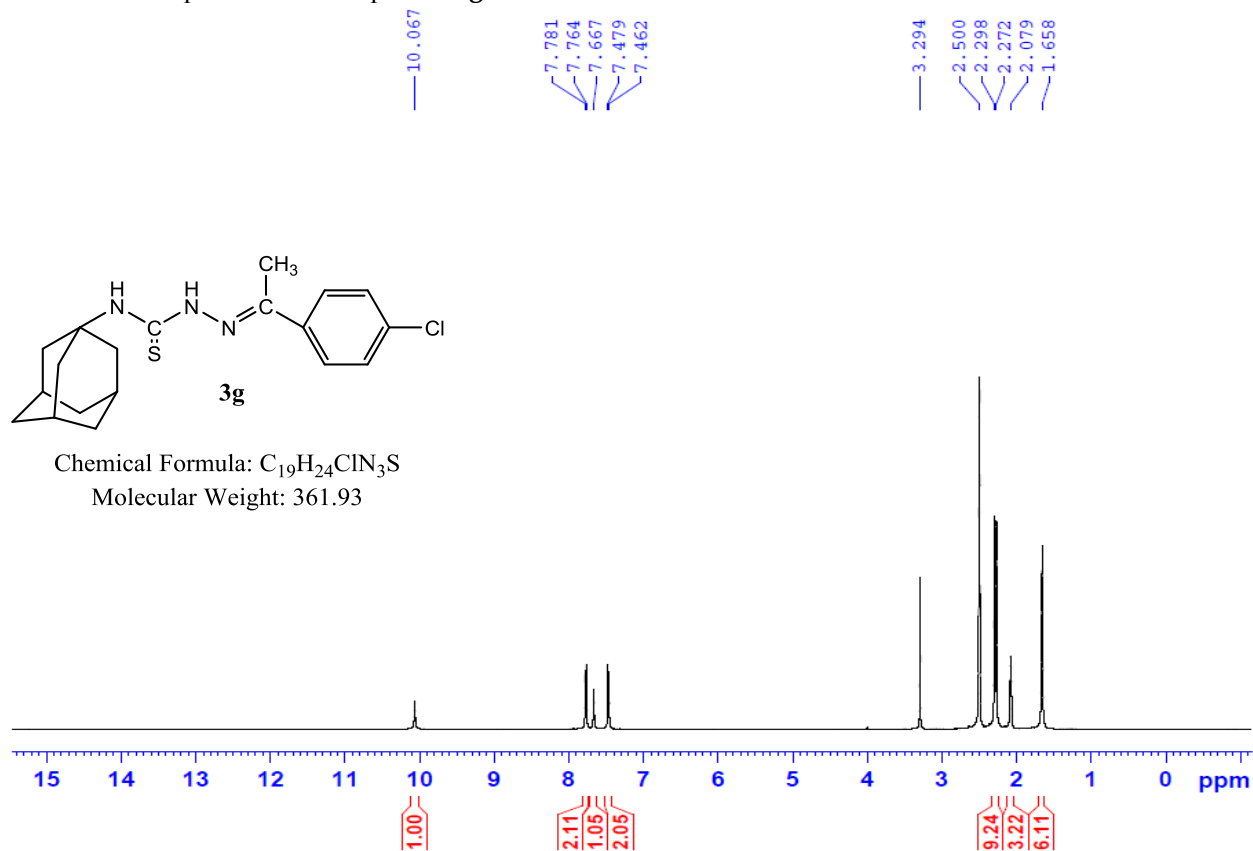

<sup>13</sup>C-NMR spectrum of compound **3g**

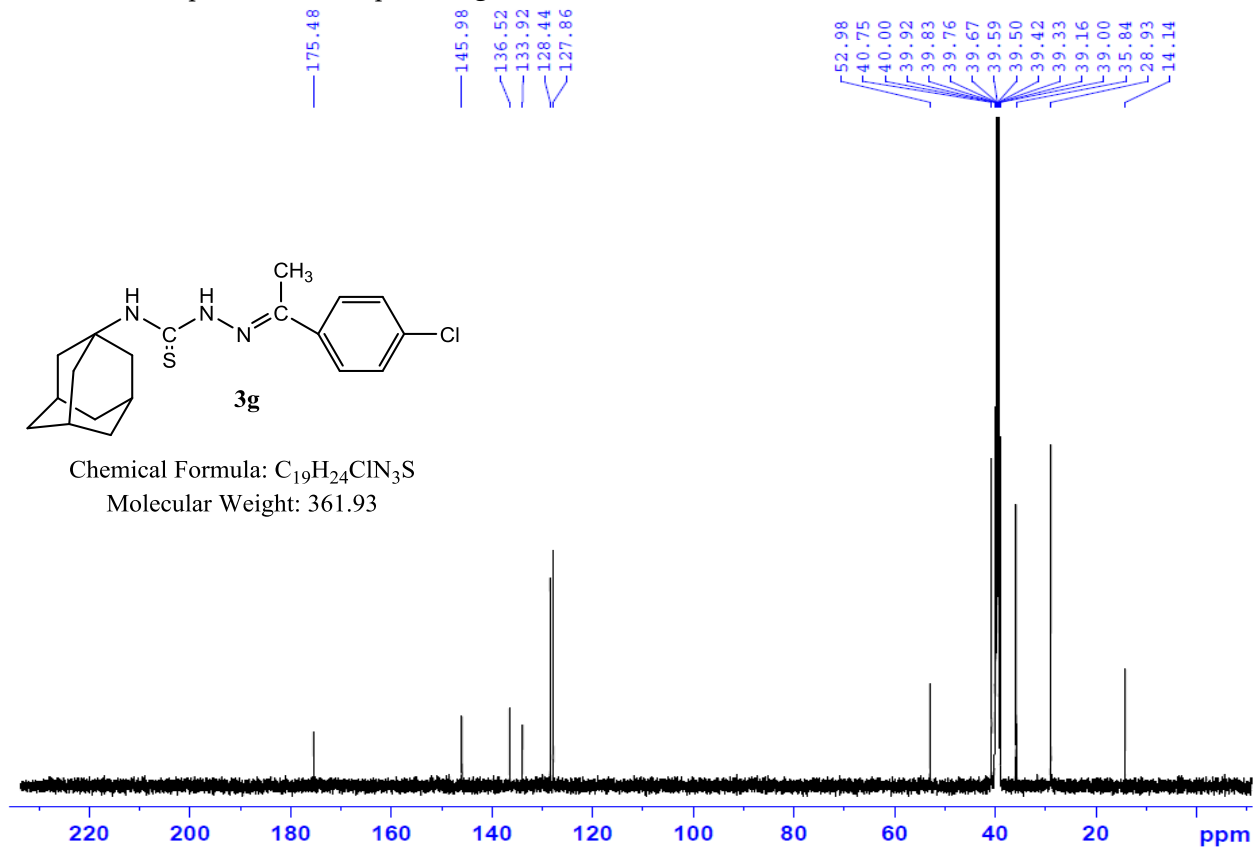

ESI-MS spectrum of compound **3g** (negative)

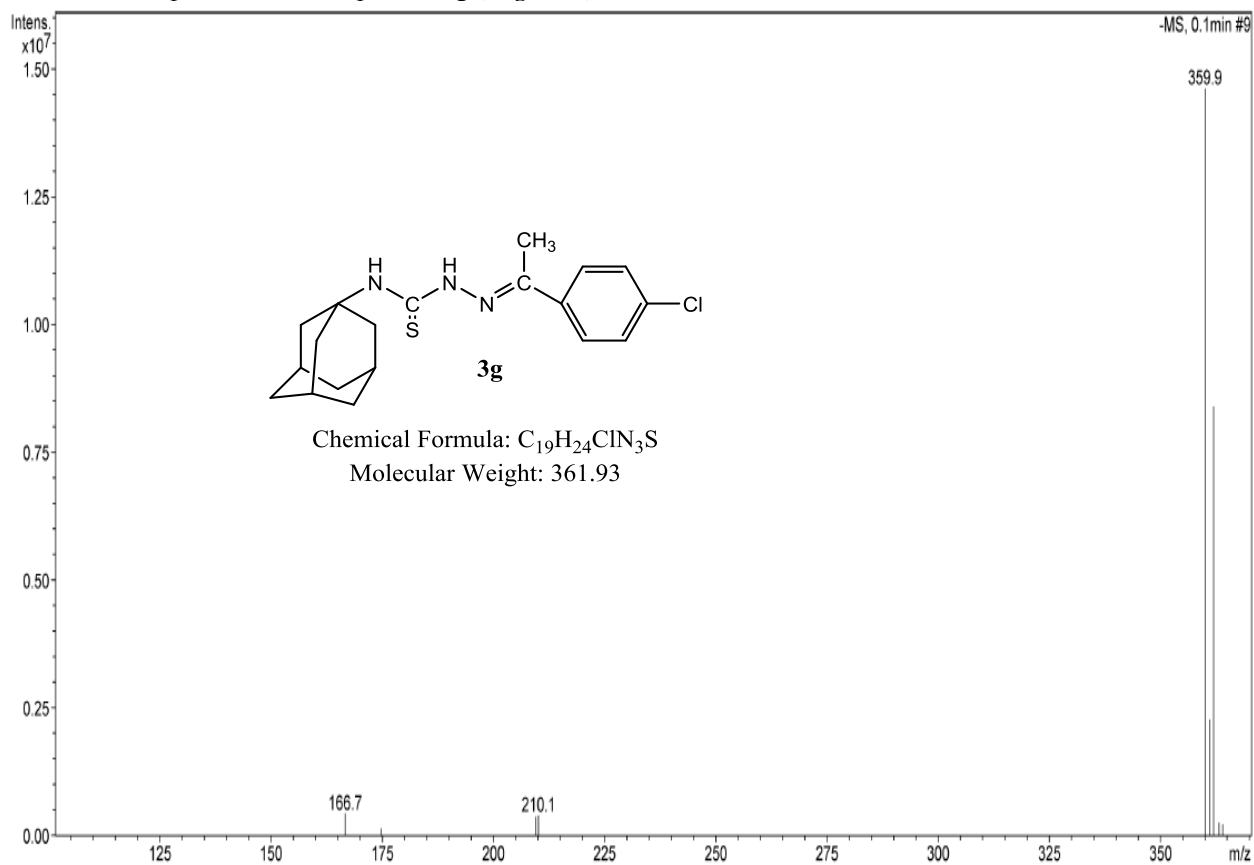

ESI-MS spectrum of compound **3g** (positive)

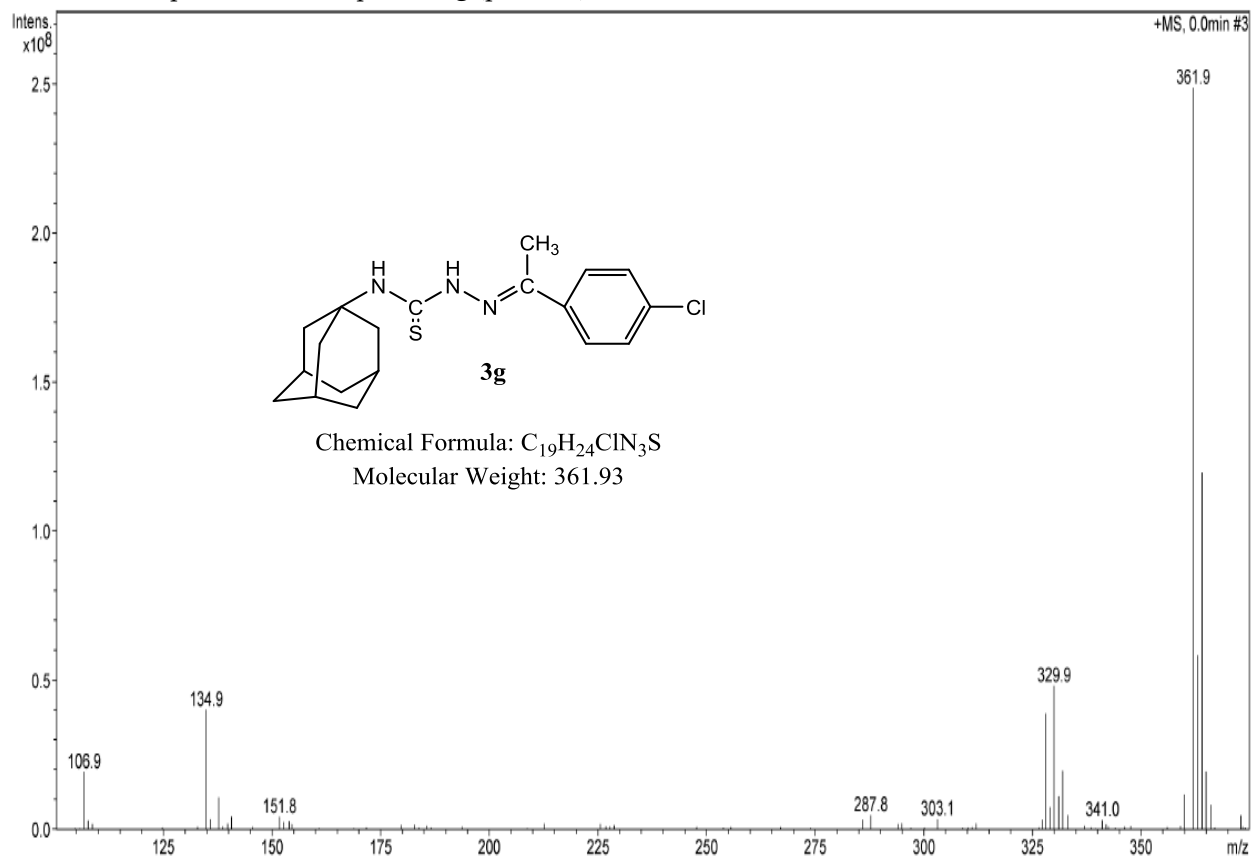

<sup>1</sup>H-NMR spectrum of compound **3h**

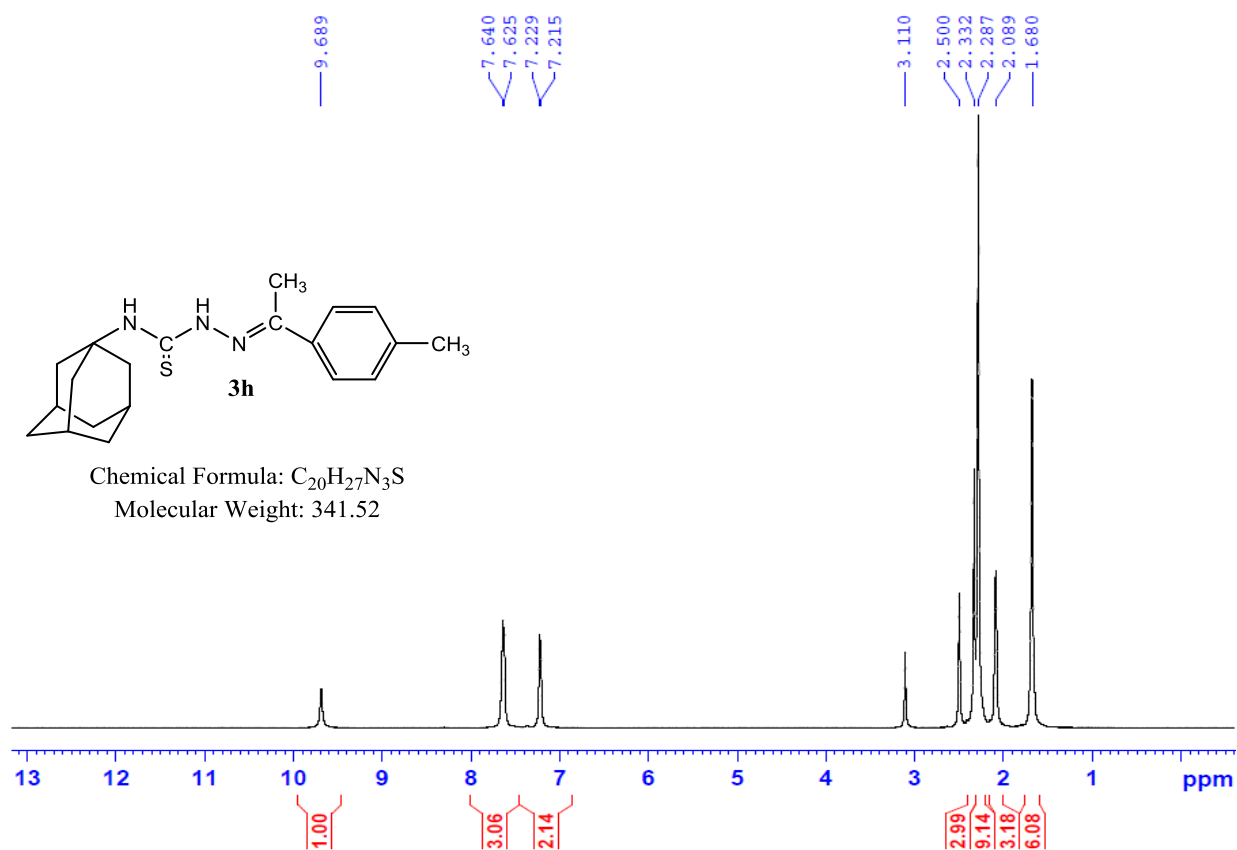

<sup>13</sup>C-NMR spectrum of compound **3h**

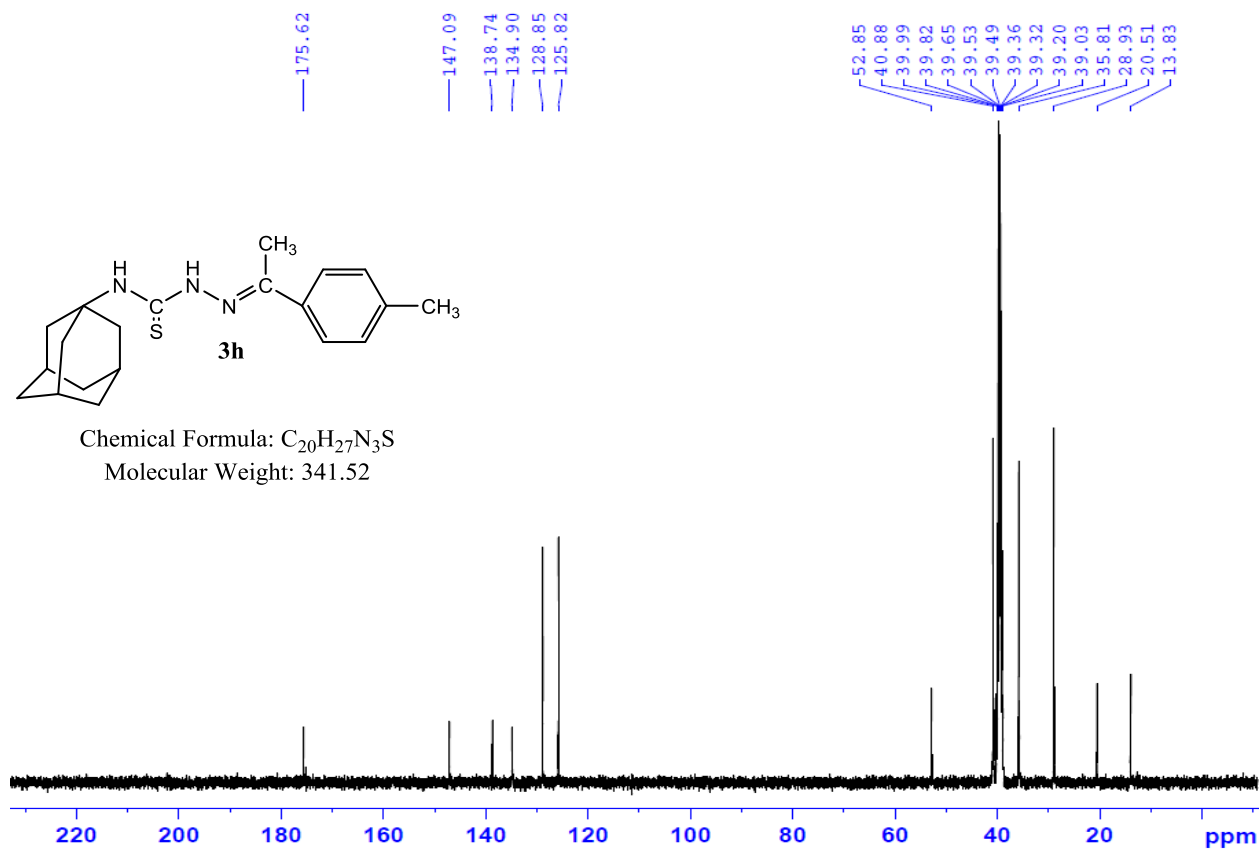

ESI-MS spectrum of compound **3h** (positive)

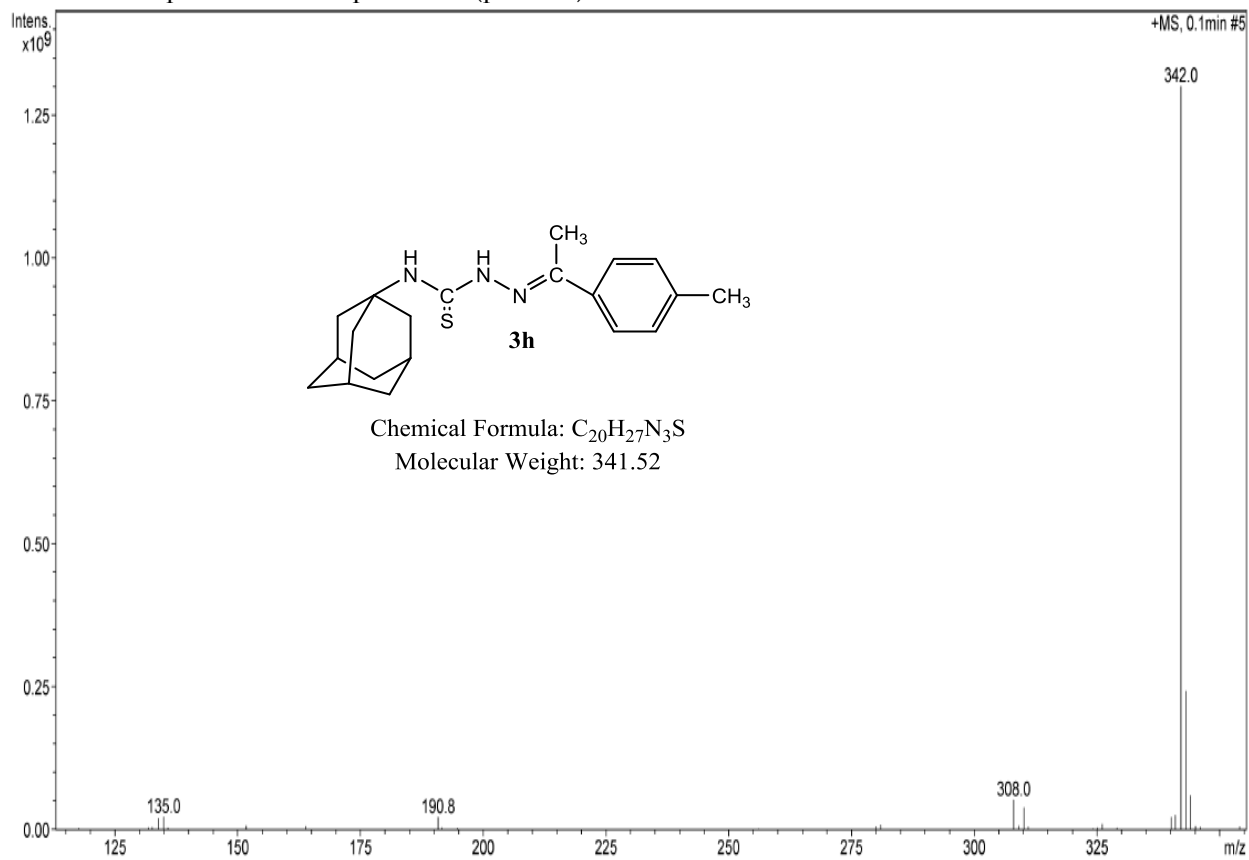

<sup>1</sup>H-NMR spectrum of compound **3i**

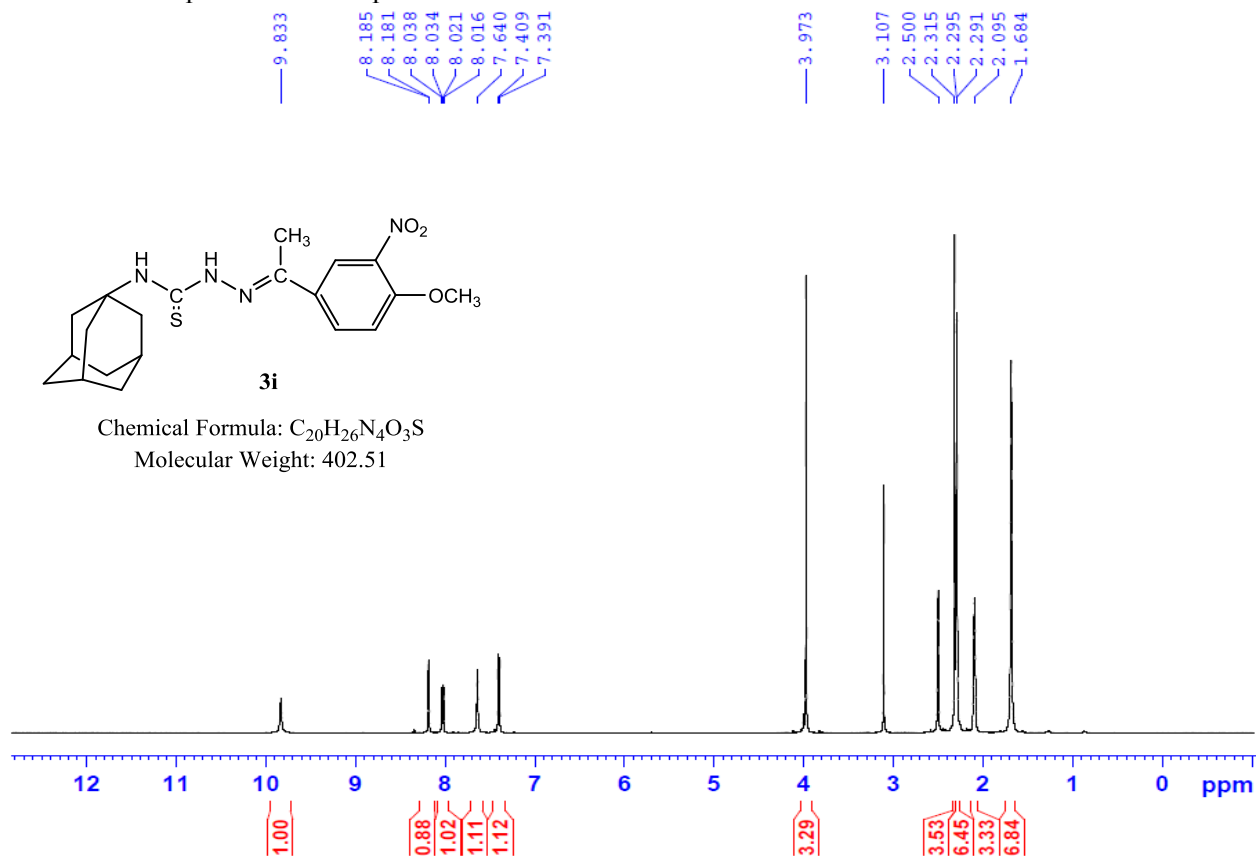

<sup>13</sup>C-NMR spectrum of compound **3i**

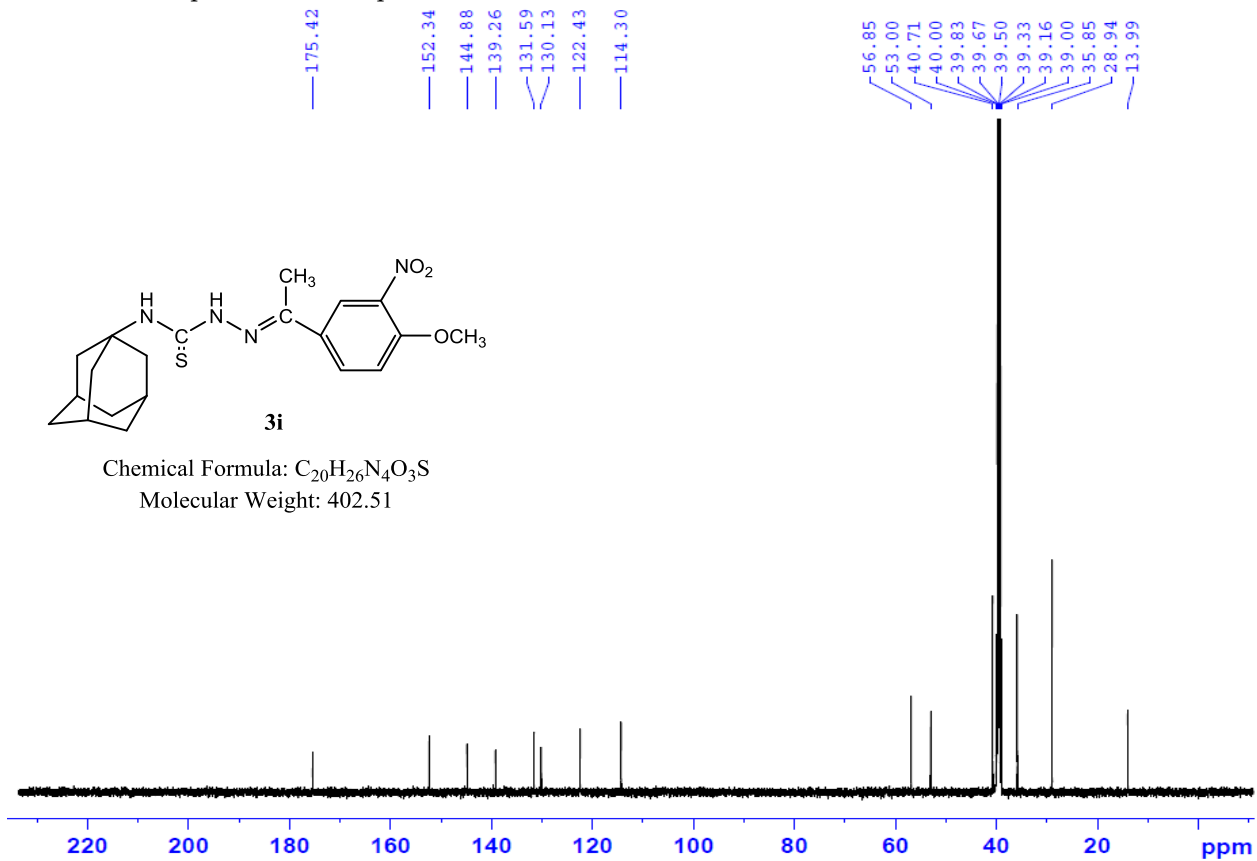



ESI-MS spectrum of compound **3i** (negative)

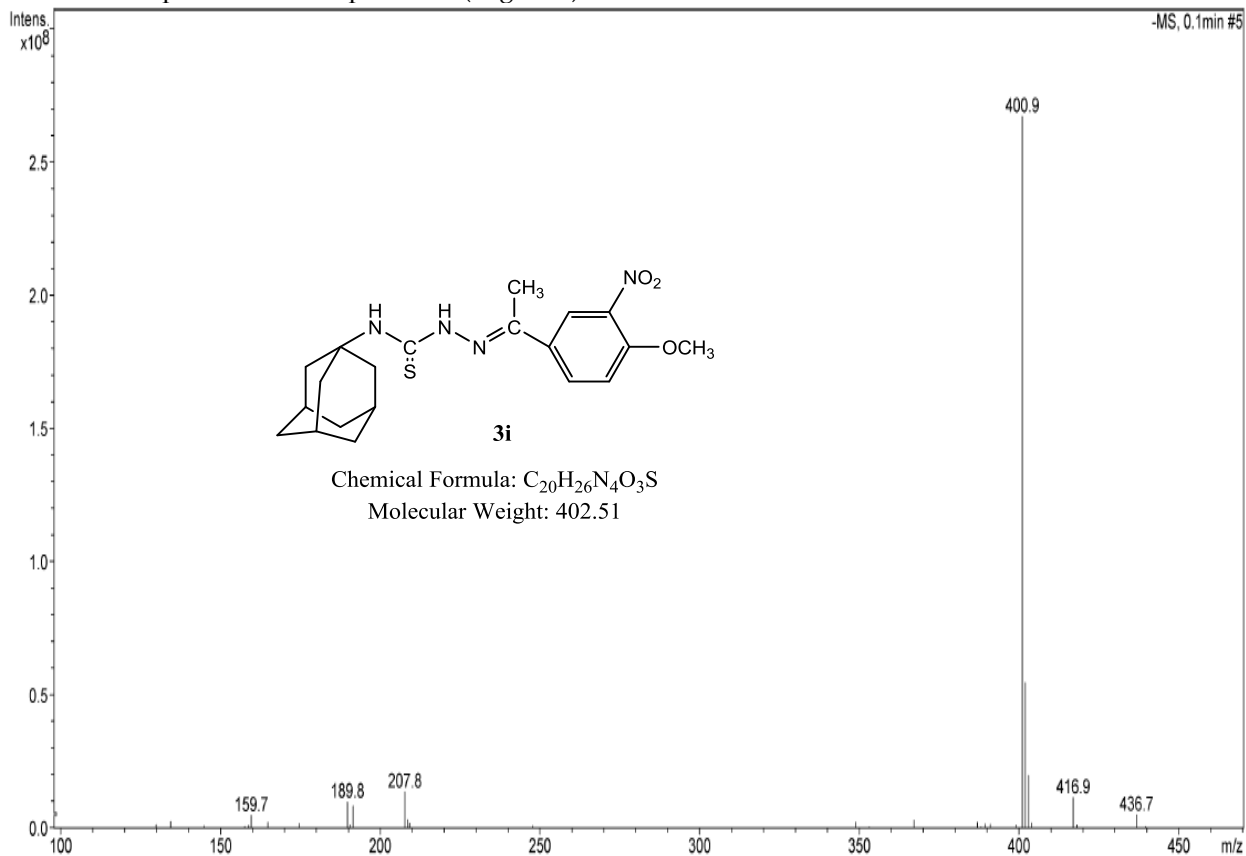

ESI-MS spectrum of compound **3i** (positive)

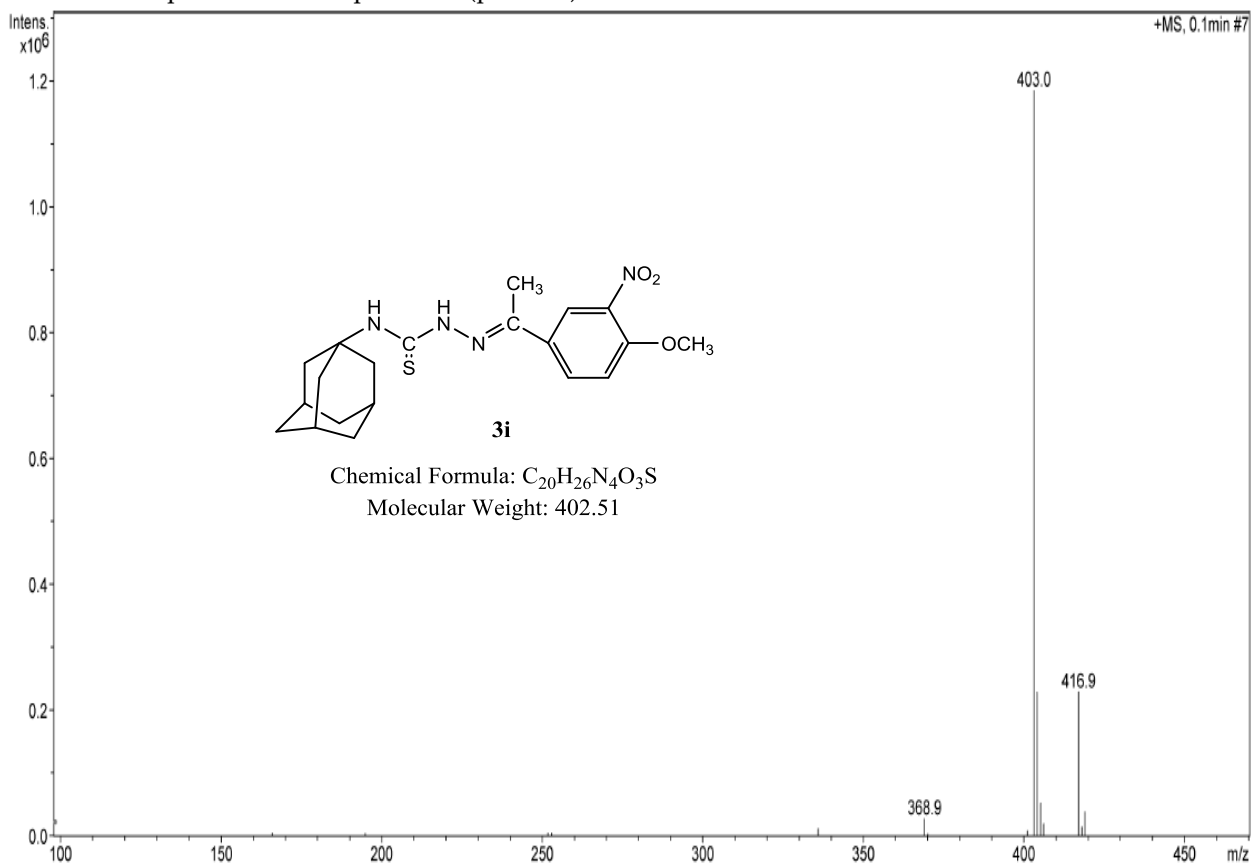

<sup>1</sup>H-NMR spectrum of compound **3j**

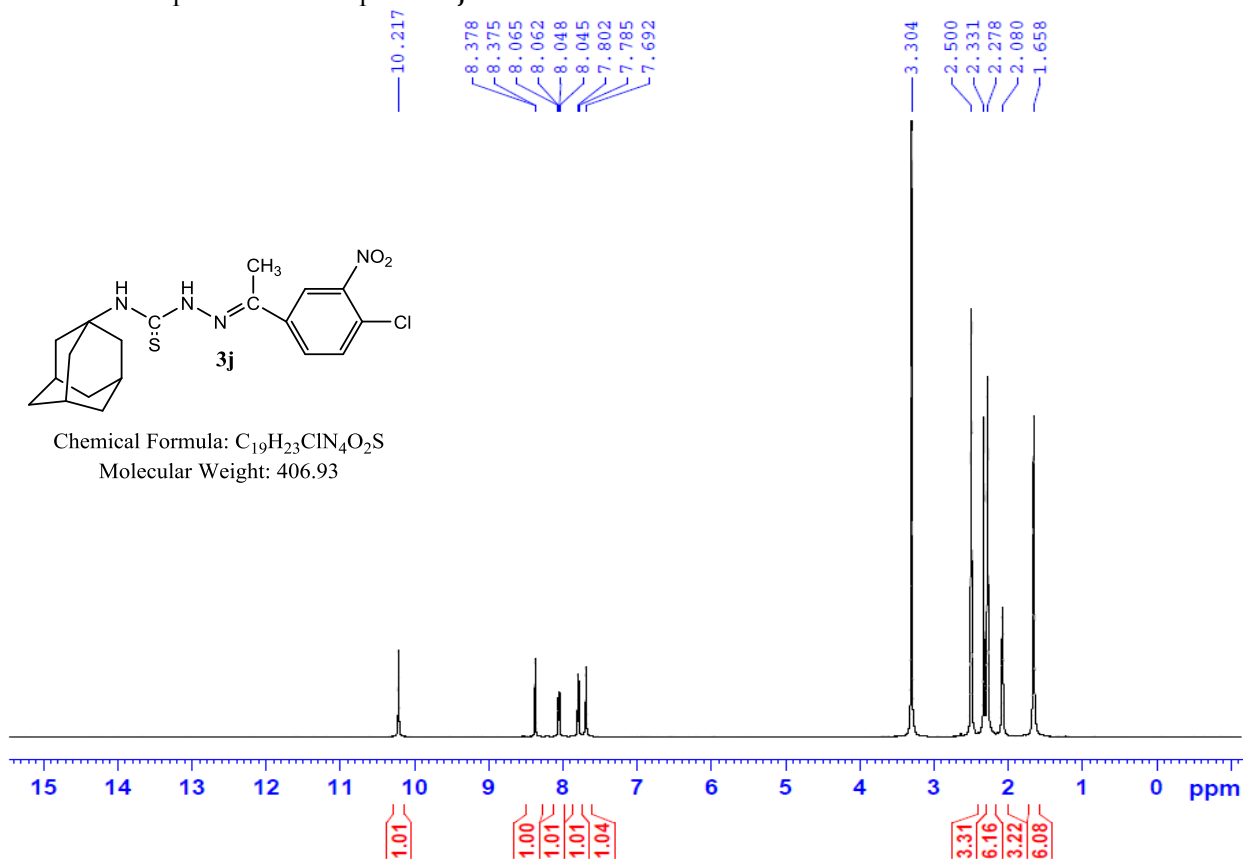

<sup>13</sup>C-NMR spectrum of compound **3j**

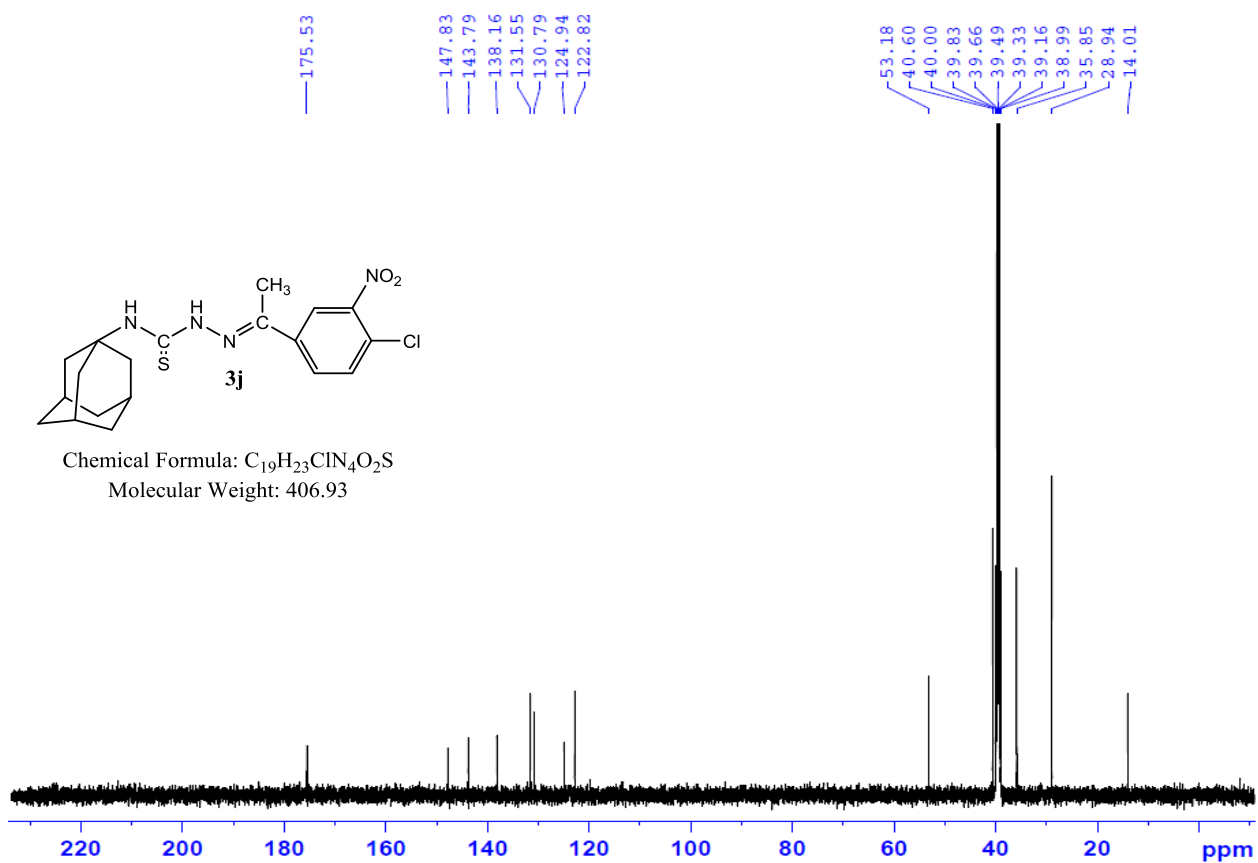

ESI-MS spectrum of compound **3j** (negative)

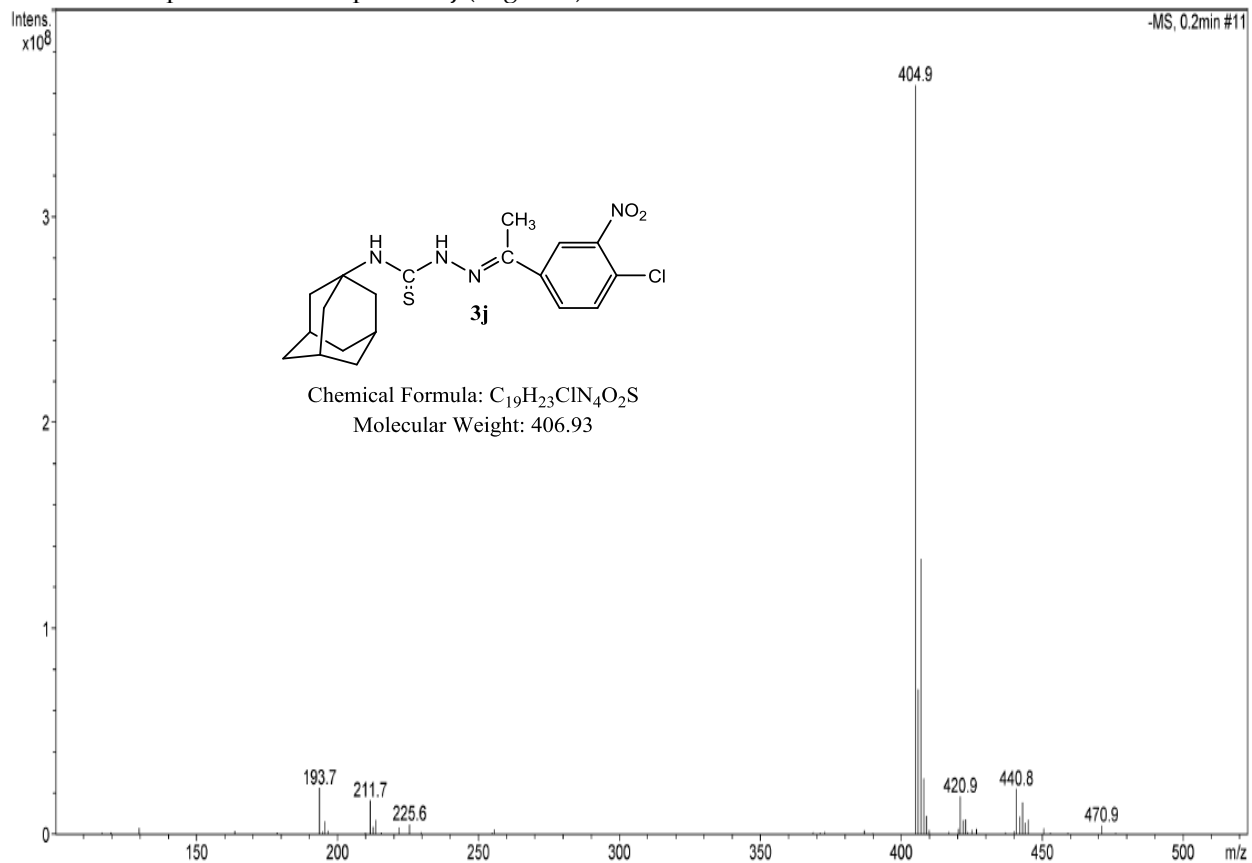

ESI-MS spectrum of compound **3j** (positive)

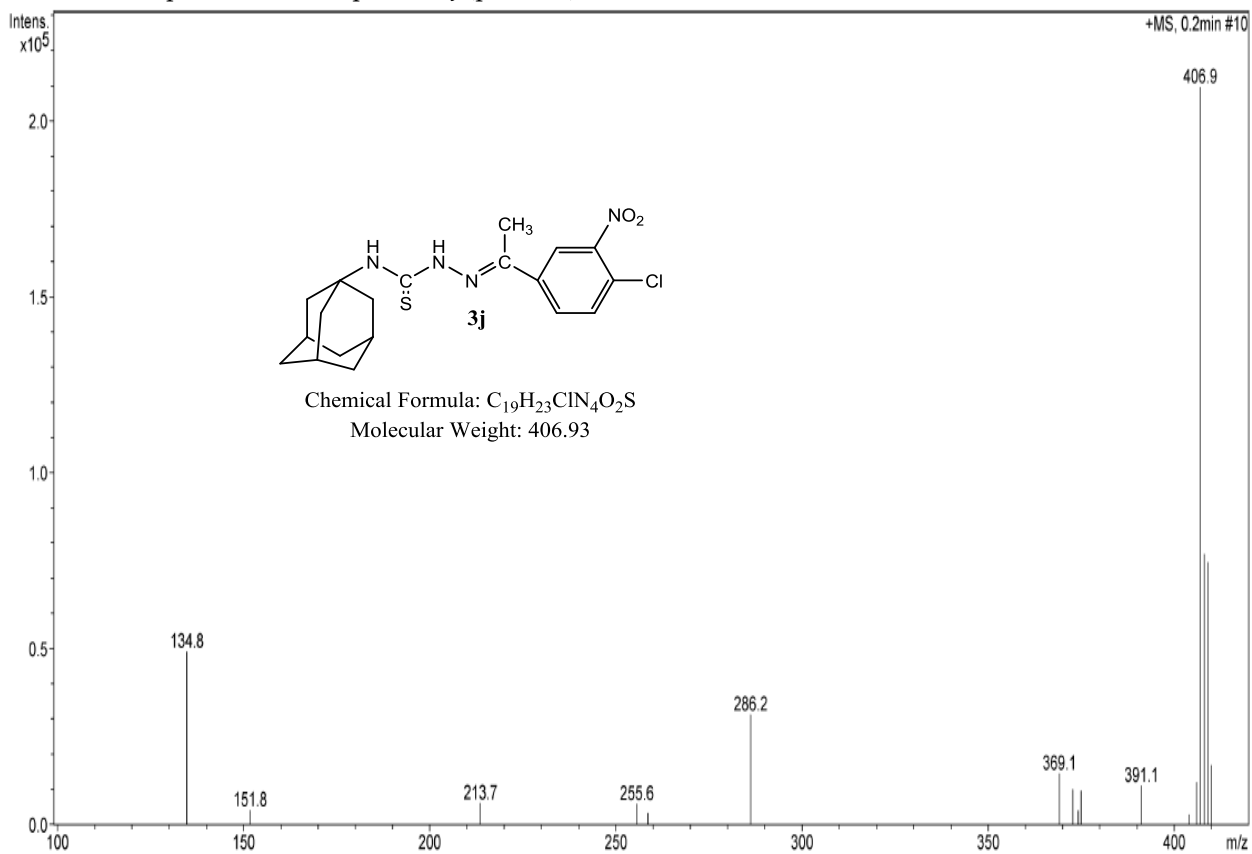

Supplement: molecules-25-00324-s001.pdf [file molecules-25-00324-s001.pdf]
